# Supplementary material for: Biochemical analysis of collagens from the bone of lizardfish (Saurida tumbil Bloch, 1795) extracted with different acids
Source: PeerJ. 2022 Mar 15;10:e13103. doi: 10.7717/peerj.13103 (PMC8932308; doi:10.7717/peerj.13103)
Supplement: Figure S1 [file peerj-10-13103-s002.xlsx]

## Sheet: Hyp+Collagen
Slope	0.1637
Intercept	0.0643
Table 1B. Hydroxyproline and collagen content of lizardfish bone collagen
Samples	T1	T2	T3	Mean	SD	Hyp (µg/mL)	Dilution factor	Hyp (µg/mL)	Initial sample (10 mg/mL)	Hyp (µg/mg)	or Hyp (mg/g)	Factor Conversion	Collagen content
CoFC	3.2464	3.2826	3.2225	3.2505	0.0247064	19.4637	100	973.183	97.3183	97.3183	97.3183	7.7	749.351
AaEC	3.315	3.2874	3.2845	3.29563	0.0137454	19.7394	100	986.968	98.6968	98.6968	98.6968	7.7	759.965
LaEC	3.288	3.2394	3.2039	3.24377	0.0344722	19.4225	100	971.126	97.1126	97.1126	97.1126	7.7	747.767
CaEC	3.2291	3.2985	3.298	3.2752	0.0325983	19.6145	100	980.727	98.0727	98.0727	98.0727	7.7	755.16

## Sheet: Sheet3
Table 1C. Yield, hydroxyproline (Hyp) and collagen content of lizardfish bone collagen extracted with different acids.
Samples	Hyp (mg/g)	Collagen (mg/g)	Yield (% dry wt.)
CoFC	97.3 ± 0.75a	749.4 ± 5.81a	-
AaEC	98.7 ± 0.42a	760.0 ± 3.23a	1.73 ± 0.08a
LaEC	97.1 ± 1.05a	747.8 ± 8.11a	1.88 ± 0.03a
CaEC	98.1 ± 1.00a	755.2 ± 7.67a	2.59 ± 0.42b
Samples	Hyp (mg/g)	SD	Collagen (mg/g)	SD
CoFC	97.3	0.75	749.4	5.81
AaEC	98.7	0.42	760	3.23
LaEC	97.1	1.05	747.8	8.11
CaEC	98.1	1	755.2	7.67
