# Supplementary material for: Biochemical analysis of collagens from the bone of lizardfish (Saurida tumbil Bloch, 1795) extracted with different acids
Source: PeerJ. 2022 Mar 15;10:e13103. doi: 10.7717/peerj.13103 (PMC8932308; doi:10.7717/peerj.13103)
Supplement: Figure S2 [file peerj-10-13103-s003.xlsx]

## Sheet: Commercial fish collagen
	Commrcial collagen
	Wavelength (nm)	Abs
	399.998	0.00548116
	399.494	0.0101463
	398.99	0.00960462
	397.983	0.00959017
	393.989	0.00542299
	392.981	0.0053119
	392.011	0.0178106
	391.507	0.0502075
	391.002	0.0366456
	389.993	0.00957995
	389.489	0.0353577
	388.984	0.0253789
	388.519	0.0198499
	388.014	0.0193605
	387.509	0.0255722
	385.49	0.0253896
	384.985	0.0469881
	384.519	0.025543
	384.014	0.0184097
	383.509	0.0176365
	383.004	0.0222874
	382.499	0.00303017
	381.994	0.000403594
	381.489	0.0151767
	380.984	0.00716886
	380.518	0.0032765
	380.012	0.00919693
	379.507	0.0163386
	379.002	0.00393627
	378.496	0.0312384
	377.991	0.0251388
	377.485	0.0106195
	377.019	0.0905241
	376.513	0.0300556
	376.008	0.0546145
	375.502	0.0527762
	374.997	0.0942241
	374.491	0.0652145
	373.985	0.0604588
	373.518	0.101503
	373.013	0.0746498
	372.507	0.0693182
	372.001	0.015337
	371.495	0.0276318
	370.989	0.0386198
	370.483	0.040255
	370.016	0.0588913
	369.51	0.0266782
	369.004	0.0216969
	368.498	0.0340849
	367.992	0.0467187
	367.486	0.0140863
	367.018	0.051683
	366.512	0.032695
	365.499	0.00577434
	364.993	0.0063977
	364.487	0.0488086
	364.019	0.0473558
	363.513	0.0252991
	363.006	0.0638253
	362.499	0.0141074
	361.993	0.0335116
	361.486	0.00863674
	360.512	0.0152883
	358.992	0.0017672
	358.485	0.010291
	356.496	0.0033835
	355.989	0.0217216
	355.482	0.0215773
	354.507	0.00334077
	353.999	0.0202138
	353.492	0.0443214
	352.985	0.0144802
	352.517	0.0176401
	351.502	0.0210008
	350.995	0.0253162
	350.487	0.0179793
	350.019	0.0159074
	349.511	0.00208415
	349.004	0.0124885
	348.496	0.00478941
	347.989	0.0266034
	347.481	0.00729889
	347.012	0.00301333
	346.505	0.0197234
	345.997	0.02899
	345.489	0.0308701
	344.981	0.0134931
	344.513	0.00197388
	344.005	0.00551265
	343.497	0.00607208
	342.989	0.0302672
	342.481	0.018618
	342.012	0.0183131
	341.504	0.0123398
	340.996	0.0445243
	340.488	0.0393515
	340.019	0.0507097
	339.511	0.0408742
	339.002	0.0390398
	338.494	0.0850756
	337.986	0.0458006
	337.517	0.0315646
	337.008	0.00312973
	335.014	0.0113347
	328.988	0.00905252
	327.5	0.0198159
	326.991	0.0105206
	325.503	0.000377659
	324.484	0.0387369
	324.014	0.00842135
	323.505	0.0344565
	322.996	0.0168716
	322.487	0.00697498
	322.016	0.0295461
	321.507	0.0140372
	320.998	0.0398261
	320.488	0.0469267
	320.018	0.00791235
	319.508	0.0412688
	318.999	0.027178
	318.489	0.0532116
	318.019	0.0416218
	317.509	0.0231487
	317	0.0352373
	316.49	0.0611698
	316.02	0.0544015
	315.51	0.0429151
	315	0.0276132
	314.49	0.00479956
	314.02	0.0315901
	313.51	0.0355749
	313	0.0291911
	312.49	0.0255456
	312.019	0.0260742
	311.509	0.0154252
	310.999	0.0258056
	310.489	0.0253239
	310.018	0.0480236
	309.508	0.0479338
	308.998	0.130863
	308.488	0.0470577
	308.017	0.0891244
	307.506	0.0981991
	306.996	0.0729201
	306.486	0.0547509
	306.015	0.0608386
	305.504	0.0637485
	304.994	0.0416004
	304.484	0.0994627
	304.012	0.110856
	303.502	0.0559674
	302.991	0.0626707
	302.481	0.0673548
	302.009	0.0478913
	301.499	0.117363
	300.988	0.0801979
	300.517	0.0731853
	300.006	0.0529775
	299.495	0.0749156
	298.985	0.069526
	298.513	0.122587
	298.002	0.113176
	297.491	0.0766655
	296.981	0.0775277
	296.509	0.0441414
	295.998	0.0658439
	295.487	0.0815783
	295.015	0.0364198
	294.504	0.0900512
	293.993	0.0678544
	293.482	0.124045
	293.01	0.07478
	292.499	0.0389018
	291.988	0.0702435
	291.516	0.0646086
	291.005	0.0503355
	290.494	0.105375
	289.982	0.0730555
	289.51	0.0630589
	288.999	0.0633482
	288.488	0.0665763
	288.016	0.0347978
	287.504	0.0697397
	286.993	0.109373
	286.481	0.0733481
	286.009	0.0818783
	285.497	0.0689242
	284.986	0.10994
	284.514	0.107861
	284.002	0.0917508
	283.49	0.0901394
	283.018	0.140324
	282.506	0.127742
	281.995	0.0833607
	281.483	0.112676
	281.01	0.0532187
	280.499	0.110504
	279.987	0.145533
	279.514	0.130626
	279.002	0.105612
	278.49	0.146653
	278.018	0.127373
	277.506	0.15604
	276.994	0.101051
	276.482	0.0998774
	276.009	0.148961
	275.497	0.0837176
	274.985	0.109414
	274.512	0.0681648
	274	0.0770843
	273.488	0.085501
	273.015	0.116804
	272.502	0.111051
	271.99	0.0853757
	271.517	0.0334231
	271.005	0.0740967
	270.492	0.0430097
	270.02	0.0475209
	269.507	0.0878728
	268.995	0.0846496
	268.482	0.0628482
	268.009	0.100802
	267.496	0.0677666
	266.984	0.0865637
	266.511	0.0885917
	265.998	0.0867806
	265.486	0.100562
	265.012	0.0921157
	264.5	0.122111
	263.987	0.0980322
	263.514	0.0974553
	263.001	0.13462
	262.488	0.141008
	262.015	0.112005
	261.502	0.149269
	260.989	0.105312
	260.515	0.0974217
	260.002	0.107503
	259.49	0.0815209
	259.016	0.0928024
	258.503	0.0670487
	257.99	0.144172
	257.516	0.193401
	257.003	0.136032
	256.49	0.142601
	256.016	0.115436
	255.503	0.106854
	254.99	0.0652059
	254.516	0.0725114
	254.003	0.0734449
	253.49	0.0601066
	253.016	0.0631816
	252.503	0.0685259
	251.989	0.0596963
	251.516	0.0637019
	251.002	0.0548522
	250.489	0.0772774
	250.015	0.0882414
	249.501	0.046051
	248.988	0.0837388
	248.514	0.0876981
	248	0.0792549
	247.487	0.0527529
	247.013	0.0901119
	246.499	0.0740879
	245.985	0.0781481
	245.511	0.0880289
	244.998	0.0522947
	244.484	0.110252
	244.01	0.084893
	243.496	0.120429
	242.982	0.126253
	242.508	0.145845
	241.994	0.142296
	241.52	0.13544
	241.006	0.097501
	240.492	0.184839
	240.018	0.180456
	239.504	0.185719
	238.99	0.237794
	238.515	0.270311
	238.001	0.307916
	237.487	0.303663
	237.013	0.360859
	236.498	0.396959
	235.984	0.410205
	235.51	0.459958
	234.996	0.487142
	234.481	0.595517
	234.007	0.652968
	233.493	0.644788
	233.018	0.74823
	232.504	0.764083
	231.989	0.918055
	231.514	0.899195
	231	0.877649
	230.011	0.706149
	227.993	0.60656
	227.518	0.352183
	227.003	0.260194
	226.489	0.22419
	226.014	0.208884
	225.499	0.227798
	224.51	0.0564813
	223.995	0.131672
	222.49	0.217484
	222.015	0.176091
	221.5	0.0289637
	220.986	0.100115
	219.996	-0.155888
	219.481	0.00860017
	219.005	0.0286452
	218.491	0.0421977
	218.015	0.059314
	217.5	0.0725507
	216.985	0.0850108
	216.51	0.0314085
	215.995	-0.00954534
	215.52	0.101027
	215.004	0.0511525
	214.489	0.0338583
	214.014	0.0881361
	213.499	-0.0434657
	212.984	0.0908074
	212.508	0.224642
	211.993	0.0910805
	211.517	0.104735
	211.002	0.0483047
	210.487	0.0652667
	210.011	-0.0234811
	209.496	0.264818
	208.981	0.0993846
	208.505	0.0612697
	207.99	-0.0579919
	207.514	-0.0115819
	206.999	-0.0564813
	206.483	0.0700379
	206.007	0.0850108
	205.492	0.158363
	205.016	-0.0347621
	204.501	0.0791813
	203.985	-0.115795
	203.509	-0.0228629
	202.994	-0.0791813
	202.518	-0.0280287
	202.002	-0.166331
	201.487	-0.0122345
	201.011	0.16481
	200.495	0.0347621
	200.019	0.0813049

## Sheet: AaEC
AA1
Wavelength (nm)	Abs
399.998	0.325278
399.494	0.325045
398.99	0.32333
398.487	0.31277
397.983	0.334016
397.518	0.29485
397.014	0.287538
396.51	0.277232
396.006	0.312809
395.502	0.322558
394.998	0.335122
394.493	0.295309
393.989	0.338934
393.485	0.28149
392.981	0.297131
392.515	0.302104
392.011	0.353378
391.507	0.363985
391.002	0.337802
390.498	0.346492
389.993	0.336761
389.489	0.341966
388.984	0.348208
388.519	0.341627
388.014	0.337561
387.509	0.34613
387.005	0.304981
386.5	0.333201
385.995	0.313531
385.49	0.308137
384.985	0.316804
384.519	0.312788
384.014	0.330209
383.509	0.274334
383.004	0.277678
382.499	0.314025
381.994	0.318162
381.489	0.326176
380.984	0.300887
380.518	0.316513
380.012	0.35028
379.507	0.350354
379.002	0.327631
378.496	0.342068
377.991	0.364131
377.485	0.3599
377.019	0.432839
376.513	0.378027
376.008	0.407918
375.502	0.411462
374.997	0.429133
374.491	0.41929
373.985	0.428563
373.518	0.450974
373.013	0.425277
372.507	0.428969
372.001	0.377916
371.495	0.37851
370.989	0.37748
370.483	0.370871
370.016	0.418312
369.51	0.384423
369.004	0.390625
368.498	0.39946
367.992	0.419882
367.486	0.389716
367.018	0.395965
366.512	0.392699
366.006	0.379165
365.499	0.397123
364.993	0.387959
364.487	0.401321
364.019	0.423519
363.513	0.409979
363.006	0.436045
362.499	0.382041
361.993	0.380286
361.486	0.367761
361.019	0.378656
360.512	0.396371
360.005	0.37914
359.498	0.36468
358.992	0.351531
358.485	0.372394
358.017	0.391688
357.51	0.378167
357.003	0.376618
356.496	0.373703
355.989	0.384904
355.482	0.427179
355.014	0.360065
354.507	0.362882
353.999	0.382282
353.492	0.402274
352.985	0.407297
352.517	0.381523
352.009	0.386588
351.502	0.401999
350.995	0.402192
350.487	0.393722
350.019	0.387794
349.511	0.389339
349.004	0.399493
348.496	0.373385
347.989	0.401648
347.481	0.398083
347.012	0.391943
346.505	0.415987
345.997	0.413732
345.489	0.408034
344.981	0.4008
344.513	0.416251
344.005	0.400687
343.497	0.403785
342.989	0.406515
342.481	0.392788
342.012	0.387877
341.504	0.421892
340.996	0.442459
340.488	0.427886
340.019	0.454946
339.511	0.446315
339.002	0.429679
338.494	0.459703
337.986	0.431097
337.517	0.446388
337.008	0.423976
336.5	0.411805
335.992	0.399828
335.483	0.418626
335.014	0.423583
334.505	0.413233
333.997	0.406229
333.488	0.438472
333.019	0.427062
332.51	0.410028
332.001	0.421134
331.492	0.410514
330.984	0.414609
330.514	0.417075
330.005	0.418377
329.496	0.416374
328.988	0.424333
328.518	0.421996
328.009	0.396887
327.5	0.423448
326.991	0.444317
326.482	0.377184
326.012	0.43296
325.503	0.41921
324.994	0.431989
324.484	0.448602
324.014	0.430503
323.505	0.430982
322.996	0.442271
322.487	0.445781
322.016	0.437383
321.507	0.442282
320.998	0.462397
320.488	0.456541
320.018	0.414753
319.508	0.444138
318.999	0.463413
318.489	0.459924
318.019	0.481067
317.509	0.453431
317	0.458726
316.49	0.477847
316.02	0.469022
315.51	0.427032
315	0.430195
314.49	0.435981
314.02	0.370191
313.51	0.437882
313	0.40023
312.49	0.41217
312.019	0.450194
311.509	0.441739
310.999	0.437093
310.489	0.412774
310.018	0.428281
309.508	0.454997
308.998	0.552696
308.488	0.471569
308.017	0.476303
307.506	0.511171
306.996	0.487958
306.486	0.453652
306.015	0.485697
305.504	0.386836
304.994	0.416312
304.484	0.496213
304.012	0.527675
303.502	0.44252
302.991	0.501852
302.481	0.448969
302.009	0.4744
301.499	0.537531
300.988	0.529636
300.517	0.544086
300.006	0.465591
299.495	0.505022
298.985	0.494753
298.513	0.53479
298.002	0.536715
297.491	0.49418
296.981	0.472353
296.509	0.442634
295.998	0.415753
295.487	0.489541
295.015	0.501126
294.504	0.534671
293.993	0.457743
293.482	0.561791
293.01	0.518952
292.499	0.518188
291.988	0.52693
291.516	0.484802
291.005	0.472818
290.494	0.576615
289.982	0.517601
289.51	0.468065
288.999	0.518301
288.488	0.449489
288.016	0.482736
287.504	0.508355
286.993	0.518253
286.481	0.528287
286.009	0.571495
285.497	0.539173
284.986	0.521733
284.514	0.538736
284.002	0.514765
283.49	0.580573
283.018	0.583085
282.506	0.593079
281.995	0.551919
281.483	0.588114
281.01	0.552798
280.499	0.565572
279.987	0.621472
279.514	0.573636
279.002	0.60797
278.49	0.596599
278.018	0.590705
277.506	0.58496
276.994	0.609111
276.482	0.56852
276.009	0.636289
275.497	0.592964
274.985	0.581327
274.512	0.541012
274	0.569991
273.488	0.527816
273.015	0.596612
272.502	0.623918
271.99	0.564469
271.517	0.579628
271.005	0.566832
270.492	0.575046
270.02	0.545889
269.507	0.588454
268.995	0.576976
268.482	0.571062
268.009	0.565732
267.496	0.519181
266.984	0.553131
266.511	0.616907
265.998	0.598702
265.486	0.617454
265.012	0.622746
264.5	0.626024
263.987	0.576749
263.514	0.615295
263.001	0.64597
262.488	0.652368
262.015	0.57221
261.502	0.65198
260.989	0.62636
260.515	0.616459
260.002	0.599277
259.49	0.631942
259.016	0.605825
258.503	0.605755
257.99	0.647893
257.516	0.744211
257.003	0.662765
256.49	0.670876
256.016	0.66676
255.503	0.6428
254.99	0.578173
254.516	0.6421
254.003	0.631759
253.49	0.605402
253.016	0.603809
252.503	0.644839
251.989	0.638471
251.516	0.651301
251.002	0.631766
250.489	0.648323
250.015	0.654004
249.501	0.679251
248.988	0.664894
248.514	0.671743
248	0.691967
247.487	0.652599
247.013	0.662046
246.499	0.690563
245.985	0.686791
245.511	0.699373
244.998	0.657967
244.484	0.718311
244.01	0.719978
243.496	0.719411
242.982	0.740006
242.508	0.677525
241.994	0.739188
241.52	0.77809
241.006	0.801881
240.492	0.773084
240.018	0.812797
239.504	0.85504
238.99	0.883112
238.515	0.863414
238.001	0.936428
237.487	0.952618
237.013	0.992046
236.498	0.970349
235.984	1.02067
235.51	1.08257
234.996	1.10027
234.481	1.20931
234.007	1.2281
233.493	1.23745
233.018	1.372
232.504	1.41619
231.989	1.49167
231.514	1.54309
231	1.44795
230.486	1.12914
230.011	0.972416
229.497	0.784242
227.518	0.595221
227.003	0.508836
226.489	0.588272
226.014	0.360151
225.499	0.389166
224.985	0.436693
224.51	0.533603
223.52	0.493827
223.005	0.458638
222.49	0.38818
222.015	0.414973
221.5	0.169142
220.986	0.531479
220.51	0.30103
219.996	0.263241
219.481	0.593627
219.005	0.349879
218.491	0.352183
218.015	0.416825
217.5	0.511883
216.985	0.39794
216.51	0.332438
215.995	0.330993
215.52	0.548185
215.004	0.45364
214.489	0.221849
214.014	0.389166
213.499	0.538391
212.984	0.445522
212.508	0.569875
211.993	0.267172
211.517	0.509306
211.002	0.403692
210.487	0.554287
210.011	0.380211
209.496	0.407485
208.981	0.413004
208.505	0.403692
207.99	0.146128
207.514	0.225779
206.999	0.277549
206.483	0.371068
206.007	0.291485
205.492	0.21388
205.016	0.410174
204.501	0.367977
203.985	0.60206
203.509	0.568202
202.994	0.146128
202.518	0.31079
202.002	0.39794
201.487	0.464887
201.011	0.199572
200.495	0.511883
200.019	0.533603

## Sheet: LaEC
LaEC
Wavelength (nm)	Abs
399.998	0.35818
399.494	0.3603
398.99	0.359035
398.487	0.360568
397.983	0.379085
397.518	0.358572
397.014	0.352755
396.51	0.35772
396.006	0.352486
395.502	0.379097
394.998	0.378757
394.493	0.361576
393.989	0.383253
393.485	0.326603
392.981	0.357486
392.515	0.394033
392.011	0.384778
391.507	0.431978
391.002	0.390546
390.498	0.395282
389.993	0.375307
389.489	0.402084
388.984	0.349166
388.519	0.395295
388.014	0.401691
387.509	0.417083
387.005	0.380569
386.5	0.36038
385.995	0.393665
385.49	0.395039
384.985	0.43134
384.519	0.377309
384.014	0.4233
383.509	0.412145
383.004	0.403657
382.499	0.437662
381.994	0.383151
381.489	0.431941
380.984	0.444101
380.518	0.407561
380.012	0.412051
379.507	0.453616
379.002	0.44113
378.496	0.442481
377.991	0.455638
377.485	0.410882
377.019	0.49049
376.513	0.450228
376.008	0.505579
375.502	0.484839
374.997	0.510416
374.491	0.512758
373.985	0.485808
373.518	0.522719
373.013	0.483343
372.507	0.489637
372.001	0.453021
371.495	0.463835
370.989	0.454266
370.483	0.459387
370.016	0.467457
369.51	0.462203
369.004	0.400581
368.498	0.412946
367.992	0.495801
367.486	0.412086
367.018	0.467783
366.512	0.433636
366.006	0.417152
365.499	0.418479
364.993	0.422391
364.487	0.432903
364.019	0.459435
363.513	0.44728
363.006	0.488415
362.499	0.398763
361.993	0.400546
361.486	0.400103
361.019	0.385356
360.512	0.408624
360.005	0.351498
359.498	0.337253
358.992	0.393608
358.485	0.338377
358.017	0.386147
357.51	0.315729
357.003	0.330234
356.496	0.35372
355.989	0.360136
355.482	0.414454
355.014	0.37605
354.507	0.386543
353.999	0.37739
353.492	0.407154
352.985	0.429926
352.517	0.389132
352.009	0.412753
351.502	0.423142
350.995	0.427796
350.487	0.403732
350.019	0.412484
349.511	0.406036
349.004	0.392535
348.496	0.393233
347.989	0.396589
347.481	0.405004
347.012	0.378141
346.505	0.400863
345.997	0.406978
345.489	0.401548
344.981	0.381076
344.513	0.376006
344.005	0.394031
343.497	0.35883
342.989	0.409848
342.481	0.445502
342.012	0.435445
341.504	0.440191
340.996	0.424415
340.488	0.429494
340.019	0.409245
339.511	0.413692
339.002	0.465195
338.494	0.481071
337.986	0.412036
337.517	0.416307
337.008	0.430826
336.5	0.413538
335.992	0.441604
335.483	0.435004
335.014	0.383236
334.505	0.374494
333.997	0.436422
333.488	0.43935
333.019	0.451357
332.51	0.436948
332.001	0.427824
331.492	0.395139
330.984	0.443484
330.514	0.427296
330.005	0.416039
329.496	0.407993
328.988	0.449866
328.518	0.446212
328.009	0.418121
327.5	0.414671
326.991	0.405495
326.482	0.413357
326.012	0.44216
325.503	0.434836
324.994	0.447202
324.484	0.405746
324.014	0.398858
323.505	0.450982
322.996	0.412771
322.487	0.401502
322.016	0.418773
321.507	0.400469
320.998	0.459175
320.488	0.458364
320.018	0.432189
319.508	0.447131
318.999	0.432856
318.489	0.444364
318.019	0.472705
317.509	0.434021
317	0.466885
316.49	0.47555
316.02	0.494637
315.51	0.451856
315	0.433139
314.49	0.465485
314.02	0.447088
313.51	0.401121
313	0.413845
312.49	0.454123
312.019	0.462364
311.509	0.413677
310.999	0.471581
310.489	0.473912
310.018	0.472246
309.508	0.46709
308.998	0.577426
308.488	0.479629
308.017	0.504575
307.506	0.545536
306.996	0.53827
306.486	0.532869
306.015	0.494923
305.504	0.514608
304.994	0.487755
304.484	0.515778
304.012	0.513464
303.502	0.495129
302.991	0.510808
302.481	0.487838
302.009	0.509151
301.499	0.562483
300.988	0.459032
300.517	0.561398
300.006	0.499493
299.495	0.514142
298.985	0.515136
298.513	0.570444
298.002	0.55815
297.491	0.527114
296.981	0.518382
296.509	0.514942
295.998	0.538787
295.487	0.556267
295.015	0.467318
294.504	0.557481
293.993	0.514429
293.482	0.553724
293.01	0.517385
292.499	0.441066
291.988	0.546696
291.516	0.522367
291.005	0.504024
290.494	0.60013
289.982	0.564496
289.51	0.461627
288.999	0.509592
288.488	0.560669
288.016	0.514088
287.504	0.564468
286.993	0.610759
286.481	0.554734
286.009	0.575169
285.497	0.572579
284.986	0.576534
284.514	0.54469
284.002	0.570746
283.49	0.559132
283.018	0.623655
282.506	0.61935
281.995	0.576451
281.483	0.615395
281.01	0.502132
280.499	0.597209
279.987	0.618736
279.514	0.617641
279.002	0.62353
278.49	0.590823
278.018	0.653435
277.506	0.6645
276.994	0.611059
276.482	0.624308
276.009	0.651239
275.497	0.614144
274.985	0.60255
274.512	0.562999
274	0.554009
273.488	0.60533
273.015	0.632905
272.502	0.648225
271.99	0.624861
271.517	0.610783
271.005	0.521408
270.492	0.5715
270.02	0.560755
269.507	0.619064
268.995	0.612461
268.482	0.56663
268.009	0.617017
267.496	0.581693
266.984	0.583771
266.511	0.623622
265.998	0.586189
265.486	0.628655
265.012	0.59524
264.5	0.672616
263.987	0.657861
263.514	0.616206
263.001	0.664878
262.488	0.640145
262.015	0.672317
261.502	0.710962
260.989	0.666057
260.515	0.672116
260.002	0.671411
259.49	0.652312
259.016	0.624704
258.503	0.650017
257.99	0.662579
257.516	0.751016
257.003	0.649889
256.49	0.691824
256.016	0.69071
255.503	0.699514
254.99	0.639859
254.516	0.633949
254.003	0.666242
253.49	0.668438
253.016	0.645084
252.503	0.632034
251.989	0.665518
251.516	0.663489
251.002	0.684769
250.489	0.676463
250.015	0.707396
249.501	0.712154
248.988	0.720784
248.514	0.729163
248	0.680708
247.487	0.695266
247.013	0.621608
246.499	0.709892
245.985	0.69616
245.511	0.737995
244.998	0.724929
244.484	0.760806
244.01	0.721241
243.496	0.760958
242.982	0.794584
242.508	0.75119
241.994	0.80273
241.52	0.788747
241.006	0.829957
240.492	0.785702
240.018	0.806689
239.504	0.855914
238.99	0.876713
238.515	0.906715
238.001	0.965578
237.487	0.984715
237.013	1.02187
236.498	1.05556
235.984	1.04832
235.51	1.08513
234.996	1.06882
234.481	1.21237
234.007	1.26005
233.493	1.26086
233.018	1.40101
232.504	1.49182
231.989	1.47018
231.514	1.51935
231	1.69659
227.993	0.708018
227.518	0.568892
227.003	0.647138
226.489	0.646264
226.014	0.536243
225.499	0.544068
224.985	0.357511
224.51	0.466656
223.995	0.451186
223.52	0.445522
223.005	0.361728
222.49	0.357146
222.015	0.444937
221.5	0.31527
220.986	0.355388
220.51	0.367977
219.996	0.281725
219.481	1.0086
219.005	0.467978
218.491	0.732394
218.015	0.416825
217.5	0.393784
216.985	0.449093
216.51	0.78837
215.995	0.449093
215.52	0.493827
215.004	0.61845
214.489	1.12494
214.014	0.347773
213.499	0.403692
212.984	1.42325
212.508	0.511883
211.993	0.723104
211.517	0.477121
211.002	0.579784
210.487	0.519525
210.011	0.60206
209.496	0.407485
208.981	0.497325
208.505	0.625541
207.99	0.243038
207.514	0.206474
206.999	0.653213
206.483	0.496007
206.007	0.422764
205.492	0.442359
205.016	0.0939045
204.501	0.3928
203.985	0.325854
203.509	0.187991
202.994	0.502675
202.518	0.477121
202.002	0.273001
201.487	0.18234
201.011	0.218056
200.495	0.477121
200.019	0.571391

## Sheet: CaEC
	CA1
	Wavelength (nm)	Abs
	399.998	0.195867
	399.494	0.195465
	398.99	0.202574
	398.487	0.208082
	397.983	0.208072
	397.518	0.203979
	397.014	0.1859
	396.51	0.190411
	396.006	0.188748
	395.502	0.210213
	394.998	0.224091
	394.493	0.205958
	393.989	0.220216
	393.485	0.197416
	392.981	0.20403
	392.515	0.202825
	392.011	0.21898
	391.507	0.243994
	391.002	0.236339
	390.498	0.21287
	389.993	0.211778
	389.489	0.229977
	388.984	0.22208
	388.519	0.219663
	388.014	0.220204
	387.509	0.234175
	387.005	0.220639
	386.5	0.229017
	385.995	0.208746
	385.49	0.224547
	384.985	0.250715
	384.519	0.224775
	384.014	0.237612
	383.509	0.218814
	383.004	0.224422
	382.499	0.213662
	381.994	0.207073
	381.489	0.231024
	380.984	0.217811
	380.518	0.191362
	380.012	0.216243
	379.507	0.245717
	379.002	0.203389
	378.496	0.228837
	377.991	0.213092
	377.485	0.22321
	377.019	0.27086
	376.513	0.25791
	376.008	0.284921
	375.502	0.283563
	374.997	0.301153
	374.491	0.285356
	373.985	0.290176
	373.518	0.311848
	373.013	0.266426
	372.507	0.284551
	372.001	0.232941
	371.495	0.25619
	370.989	0.271208
	370.483	0.233677
	370.016	0.258673
	369.51	0.233395
	369.004	0.225728
	368.498	0.25233
	367.992	0.274227
	367.486	0.234324
	367.018	0.258351
	366.512	0.270047
	366.006	0.228194
	365.499	0.234558
	364.993	0.22741
	364.487	0.243918
	364.019	0.263088
	363.513	0.260855
	363.006	0.285721
	362.499	0.244572
	361.993	0.243831
	361.486	0.258978
	361.019	0.233832
	360.512	0.250245
	360.005	0.236325
	359.498	0.22973
	358.992	0.224833
	358.485	0.228483
	358.017	0.234775
	357.51	0.238025
	357.003	0.207853
	356.496	0.218495
	355.989	0.245208
	355.482	0.273131
	355.014	0.226892
	354.507	0.200221
	353.999	0.234615
	353.492	0.249294
	352.985	0.240049
	352.517	0.222837
	352.009	0.240761
	351.502	0.24284
	350.995	0.274273
	350.487	0.229093
	350.019	0.231557
	349.511	0.250383
	349.004	0.24187
	348.496	0.238551
	347.989	0.267234
	347.481	0.231111
	347.012	0.204029
	346.505	0.22207
	345.997	0.244571
	345.489	0.170938
	344.981	0.175915
	344.513	0.239948
	344.005	0.17254
	343.497	0.199205
	342.989	0.214585
	342.481	0.217903
	342.012	0.242531
	341.504	0.17871
	340.996	0.267771
	340.488	0.252478
	340.019	0.251796
	339.511	0.248738
	339.002	0.22408
	338.494	0.291357
	337.986	0.2353
	337.517	0.227043
	337.008	0.191899
	336.5	0.211651
	335.992	0.217488
	335.483	0.207505
	335.014	0.245264
	334.505	0.203891
	333.997	0.193895
	333.488	0.215129
	333.019	0.224274
	332.51	0.230376
	332.001	0.236302
	331.492	0.235748
	330.984	0.208095
	330.514	0.1956
	330.005	0.226074
	329.496	0.183513
	328.988	0.215687
	328.518	0.222083
	328.009	0.240896
	327.5	0.238215
	326.991	0.210149
	326.482	0.233713
	326.012	0.20225
	325.503	0.214301
	324.994	0.207967
	324.484	0.237943
	324.014	0.219277
	323.505	0.19172
	322.996	0.229106
	322.487	0.193835
	322.016	0.243663
	321.507	0.210352
	320.998	0.256382
	320.488	0.240388
	320.018	0.2204
	319.508	0.21512
	318.999	0.253819
	318.489	0.209489
	318.019	0.250387
	317.509	0.22588
	317	0.172858
	316.49	0.22342
	316.02	0.281793
	315.51	0.242953
	315	0.182147
	314.49	0.21616
	314.02	0.240288
	313.51	0.244483
	313	0.242151
	312.49	0.236537
	312.019	0.245326
	311.509	0.219422
	310.999	0.231278
	310.489	0.255497
	310.018	0.290565
	309.508	0.281286
	308.998	0.324096
	308.488	0.271237
	308.017	0.316314
	307.506	0.326336
	306.996	0.281839
	306.486	0.270243
	306.015	0.26833
	305.504	0.260903
	304.994	0.250662
	304.484	0.306883
	304.012	0.28594
	303.502	0.280756
	302.991	0.291613
	302.481	0.278996
	302.009	0.251207
	301.499	0.280705
	300.988	0.276926
	300.517	0.295285
	300.006	0.22679
	299.495	0.271609
	298.985	0.260578
	298.513	0.311647
	298.002	0.315714
	297.491	0.283125
	296.981	0.272301
	296.509	0.286288
	295.998	0.298869
	295.487	0.309868
	295.015	0.272477
	294.504	0.294177
	293.993	0.269554
	293.482	0.354476
	293.01	0.308815
	292.499	0.284252
	291.988	0.280315
	291.516	0.285151
	291.005	0.257535
	290.494	0.360441
	289.982	0.30636
	289.51	0.299697
	288.999	0.292868
	288.488	0.291149
	288.016	0.302638
	287.504	0.30558
	286.993	0.321586
	286.481	0.244501
	286.009	0.237733
	285.497	0.283251
	284.986	0.319182
	284.514	0.28989
	284.002	0.289872
	283.49	0.324512
	283.018	0.310904
	282.506	0.368469
	281.995	0.282029
	281.483	0.335833
	281.01	0.30974
	280.499	0.307635
	279.987	0.347615
	279.514	0.340011
	279.002	0.362703
	278.49	0.371379
	278.018	0.352623
	277.506	0.357404
	276.994	0.326999
	276.482	0.329012
	276.009	0.351473
	275.497	0.275889
	274.985	0.316293
	274.512	0.233641
	274	0.256233
	273.488	0.311187
	273.015	0.339996
	272.502	0.337937
	271.99	0.32597
	271.517	0.322279
	271.005	0.274425
	270.492	0.25913
	270.02	0.299588
	269.507	0.297987
	268.995	0.289115
	268.482	0.25336
	268.009	0.345843
	267.496	0.325693
	266.984	0.320402
	266.511	0.343624
	265.998	0.262389
	265.486	0.36268
	265.012	0.317733
	264.5	0.333045
	263.987	0.28843
	263.514	0.310462
	263.001	0.354508
	262.488	0.396599
	262.015	0.349811
	261.502	0.411792
	260.989	0.356984
	260.515	0.370106
	260.002	0.341546
	259.49	0.351501
	259.016	0.340071
	258.503	0.327072
	257.99	0.40648
	257.516	0.443907
	257.003	0.347003
	256.49	0.399735
	256.016	0.354645
	255.503	0.365067
	254.99	0.337441
	254.516	0.346019
	254.003	0.350393
	253.49	0.308616
	253.016	0.342705
	252.503	0.366166
	251.989	0.350865
	251.516	0.331922
	251.002	0.307898
	250.489	0.32659
	250.015	0.349505
	249.501	0.351689
	248.988	0.374855
	248.514	0.361383
	248	0.360012
	247.487	0.365799
	247.013	0.357937
	246.499	0.380592
	245.985	0.400781
	245.511	0.372505
	244.998	0.382288
	244.484	0.384067
	244.01	0.423748
	243.496	0.423701
	242.982	0.432577
	242.508	0.418017
	241.994	0.419519
	241.52	0.383191
	241.006	0.43862
	240.492	0.455907
	240.018	0.484338
	239.504	0.496276
	238.99	0.51252
	238.515	0.546215
	238.001	0.604716
	237.487	0.580229
	237.013	0.575272
	236.498	0.620116
	235.984	0.633443
	235.51	0.650073
	234.996	0.670953
	234.481	0.791579
	234.007	0.827464
	233.493	0.806708
	233.018	0.922584
	232.504	0.973447
	231.989	1.17215
	231.514	1.03158
	231	0.967135
	230.486	0.942456
	230.011	0.807606
	227.993	0.708018
	227.518	0.520587
	227.003	0.453318
	226.489	0.41218
	226.014	0.564271
	225.499	0.309985
	224.985	0.214844
	224.51	0.290565
	223.995	0.350515
	223.52	0.344065
	223.005	0.231394
	222.49	0.30103
	222.015	0.290035
	221.5	0.0599979
	220.986	0.230449
	220.51	0.168404
	219.996	0.263241
	219.481	0.189056
	219.005	0.371068
	218.491	0.255273
	218.015	0.115795
	217.5	0.511883
	216.985	0.148063
	216.51	0.311249
	215.995	0.539269
	215.52	0.247155
	215.004	0.410174
	214.489	0.20412
	214.014	0.258832
	213.499	0.102662
	212.984	0.402057
	212.508	0.318063
	211.993	0.153228
	211.517	0.160851
	211.002	0.237361
	210.487	0.48734
	210.011	0.0649408
	209.496	0.185637
	208.981	0.245513
	208.505	0.14842
	207.99	0
	207.514	0.245982
	206.999	0.255273
	206.483	0.393344
	206.007	0.374459
	205.492	0.141329
	205.016	0.30103
	204.501	0.509306
	203.985	0.0791813
	203.509	0.665112
	202.994	0.313619
	202.518	0.539269
	202.002	-0.0280287
	201.487	0.146128
	201.011	0.199572
	200.495	0.248642
	200.019	0.150386
