# Supplementary material for: Biochemical analysis of collagens from the bone of lizardfish (Saurida tumbil Bloch, 1795) extracted with different acids
Source: PeerJ. 2022 Mar 15;10:e13103. doi: 10.7717/peerj.13103 (PMC8932308; doi:10.7717/peerj.13103)
Supplement: Figure S3 [file peerj-10-13103-s004.xlsx]

## Sheet: AaEC
XLabel	Wavenumber
YLabel	Absorbance
FileType	Absorbance
DisplayDirection	20300
PeakDirection	20310
799.534	0.156976
801.398	0.156846
803.262	0.156636
805.125	0.15633
806.989	0.155933
808.853	0.155467
810.716	0.154901
812.58	0.154191
814.444	0.153357
816.308	0.152463
818.171	0.15155
820.035	0.150637
821.899	0.149747
823.762	0.148904
825.626	0.148117
827.49	0.147382
829.354	0.146661
831.217	0.145899
833.081	0.145064
834.945	0.144164
836.808	0.143187
838.672	0.142174
840.536	0.141158
842.4	0.140135
844.263	0.139107
846.127	0.13814
847.991	0.137229
849.854	0.136357
851.718	0.135539
853.582	0.134765
855.446	0.133985
857.309	0.133226
859.173	0.132542
861.037	0.131919
862.9	0.131328
864.764	0.13074
866.628	0.130161
868.492	0.129599
870.355	0.129018
872.219	0.128441
874.083	0.127869
875.946	0.127307
877.81	0.126792
879.674	0.126328
881.538	0.125917
883.401	0.125588
885.265	0.125341
887.129	0.125131
888.992	0.124959
890.856	0.124865
892.72	0.124818
894.584	0.124827
896.447	0.124914
898.311	0.125074
900.175	0.125277
902.038	0.125533
903.902	0.125859
905.766	0.126247
907.63	0.126713
909.493	0.127261
911.357	0.127879
913.221	0.128537
915.084	0.129189
916.948	0.129831
918.812	0.130433
920.676	0.130948
922.539	0.131357
924.403	0.131672
926.267	0.131921
928.13	0.132107
929.994	0.132225
931.858	0.132295
933.722	0.132334
935.585	0.132326
937.449	0.132256
939.313	0.13215
941.176	0.132039
943.04	0.131933
944.904	0.131825
946.768	0.131743
948.631	0.131703
950.495	0.131677
952.359	0.13163
954.222	0.131523
956.086	0.131333
957.95	0.131045
959.814	0.130682
961.677	0.130296
963.541	0.129901
965.405	0.129542
967.268	0.129307
969.132	0.129213
970.996	0.129257
972.86	0.129453
974.723	0.129791
976.587	0.130258
978.451	0.130847
980.315	0.131551
982.178	0.132388
984.042	0.133359
985.906	0.134439
987.769	0.135624
989.633	0.136909
991.497	0.138273
993.361	0.139708
995.224	0.141235
997.088	0.142906
998.952	0.144823
1000.82	0.147037
1002.68	0.149549
1004.54	0.152382
1006.41	0.155486
1008.27	0.158774
1010.13	0.162174
1012	0.165595
1013.86	0.168964
1015.73	0.172259
1017.59	0.175477
1019.45	0.178626
1021.32	0.181701
1023.18	0.184639
1025.04	0.18737
1026.91	0.189853
1028.77	0.192025
1030.63	0.193854
1032.5	0.195377
1034.36	0.196619
1036.23	0.197616
1038.09	0.198441
1039.95	0.199131
1041.82	0.199702
1043.68	0.20017
1045.54	0.200507
1047.41	0.200725
1049.27	0.20087
1051.14	0.200985
1053	0.201109
1054.86	0.201265
1056.73	0.201473
1058.59	0.201714
1060.45	0.201913
1062.32	0.202022
1064.18	0.202015
1066.05	0.201858
1067.91	0.201566
1069.77	0.201224
1071.64	0.200877
1073.5	0.200553
1075.36	0.200301
1077.23	0.200145
1079.09	0.20008
1080.96	0.200126
1082.82	0.200303
1084.68	0.200647
1086.55	0.201216
1088.41	0.202041
1090.27	0.203145
1092.14	0.204555
1094	0.206254
1095.86	0.208209
1097.73	0.210374
1099.59	0.212702
1101.46	0.215129
1103.32	0.21758
1105.18	0.219992
1107.05	0.22231
1108.91	0.224447
1110.77	0.226286
1112.64	0.227719
1114.5	0.228669
1116.37	0.2291
1118.23	0.229033
1120.09	0.228522
1121.96	0.227676
1123.82	0.226613
1125.68	0.225415
1127.55	0.224167
1129.41	0.222921
1131.28	0.221668
1133.14	0.220359
1135	0.218937
1136.87	0.217301
1138.73	0.215363
1140.59	0.213079
1142.46	0.210402
1144.32	0.207327
1146.19	0.203906
1148.05	0.200257
1149.91	0.196526
1151.78	0.192874
1153.64	0.189482
1155.5	0.186519
1157.37	0.184131
1159.23	0.182443
1161.09	0.181531
1162.96	0.181432
1164.82	0.182166
1166.69	0.183721
1168.55	0.185987
1170.41	0.188842
1172.28	0.192207
1174.14	0.195974
1176	0.200024
1177.87	0.204243
1179.73	0.208522
1181.6	0.212791
1183.46	0.216995
1185.32	0.221084
1187.19	0.225062
1189.05	0.228971
1190.91	0.232841
1192.78	0.236702
1194.64	0.240579
1196.51	0.24451
1198.37	0.248519
1200.23	0.252636
1202.1	0.256884
1203.96	0.26126
1205.82	0.265738
1207.69	0.270279
1209.55	0.27481
1211.42	0.279219
1213.28	0.283377
1215.14	0.28718
1217.01	0.290516
1218.87	0.293262
1220.73	0.295342
1222.6	0.296736
1224.46	0.297482
1226.32	0.297673
1228.19	0.297397
1230.05	0.296754
1231.92	0.295841
1233.78	0.294696
1235.64	0.293334
1237.51	0.29177
1239.37	0.289985
1241.23	0.287949
1243.1	0.285637
1244.96	0.283033
1246.83	0.280125
1248.69	0.276911
1250.55	0.273398
1252.42	0.269611
1254.28	0.26559
1256.14	0.261386
1258.01	0.257063
1259.87	0.252678
1261.74	0.248283
1263.6	0.24395
1265.46	0.239746
1267.33	0.235709
1269.19	0.231864
1271.05	0.228245
1272.92	0.224874
1274.78	0.221765
1276.65	0.218915
1278.51	0.216297
1280.37	0.213891
1282.24	0.21167
1284.1	0.209595
1285.96	0.207653
1287.83	0.20584
1289.69	0.204151
1291.56	0.20258
1293.42	0.201085
1295.28	0.199648
1297.15	0.198262
1299.01	0.196897
1300.87	0.195549
1302.74	0.19425
1304.6	0.19306
1306.46	0.192073
1308.33	0.191348
1310.19	0.190903
1312.06	0.19073
1313.92	0.190809
1315.78	0.19114
1317.65	0.191632
1319.51	0.192071
1321.37	0.192367
1323.24	0.192537
1325.1	0.192596
1326.97	0.192555
1328.83	0.192412
1330.69	0.192214
1332.56	0.192026
1334.42	0.191841
1336.28	0.191658
1338.15	0.191598
1340.01	0.191839
1341.88	0.192279
1343.74	0.192789
1345.6	0.193486
1347.47	0.19432
1349.33	0.195149
1351.19	0.196034
1353.06	0.196872
1354.92	0.197459
1356.79	0.197802
1358.65	0.197922
1360.51	0.197788
1362.38	0.197443
1364.24	0.197135
1366.1	0.197015
1367.97	0.196931
1369.83	0.196913
1371.69	0.197169
1373.56	0.197717
1375.42	0.1985
1377.29	0.19951
1379.15	0.200518
1381.01	0.201546
1382.88	0.202692
1384.74	0.203658
1386.6	0.204192
1388.47	0.204459
1390.33	0.20454
1392.2	0.204263
1394.06	0.203777
1395.92	0.203464
1397.79	0.203096
1399.65	0.202426
1401.51	0.201789
1403.38	0.201181
1405.24	0.200562
1407.11	0.200148
1408.97	0.199893
1410.83	0.199545
1412.7	0.199432
1414.56	0.200169
1416.42	0.201259
1418.29	0.202306
1420.15	0.20348
1422.02	0.204857
1423.88	0.206461
1425.74	0.208483
1427.61	0.210585
1429.47	0.212409
1431.33	0.214041
1433.2	0.215749
1435.06	0.217728
1436.92	0.219337
1438.79	0.22047
1440.65	0.22129
1442.52	0.221672
1444.38	0.221542
1446.24	0.221071
1448.11	0.220275
1449.97	0.219418
1451.83	0.218466
1453.7	0.217179
1455.56	0.215581
1457.43	0.213828
1459.29	0.211699
1461.15	0.208763
1463.02	0.205502
1464.88	0.202327
1466.74	0.19928
1468.61	0.196139
1470.47	0.192499
1472.34	0.188562
1474.2	0.185117
1476.06	0.182292
1477.93	0.179724
1479.79	0.177087
1481.65	0.174299
1483.52	0.17304
1485.38	0.174148
1487.25	0.175441
1489.11	0.176878
1490.97	0.178971
1492.84	0.18199
1494.7	0.186031
1496.56	0.19057
1498.43	0.195965
1500.29	0.202559
1502.15	0.209641
1504.02	0.21739
1505.88	0.2257
1507.75	0.234275
1509.61	0.24336
1511.47	0.253112
1513.34	0.262507
1515.2	0.271556
1517.06	0.281672
1518.93	0.292918
1520.79	0.30346
1522.66	0.313399
1524.52	0.323042
1526.38	0.332542
1528.25	0.341759
1530.11	0.349545
1531.97	0.35514
1533.84	0.360401
1535.7	0.365628
1537.57	0.370446
1539.43	0.3739
1541.29	0.375962
1543.16	0.376985
1545.02	0.376774
1546.88	0.375251
1548.75	0.372985
1550.61	0.369685
1552.48	0.365666
1554.34	0.361474
1556.2	0.35658
1558.07	0.350624
1559.93	0.344552
1561.79	0.338636
1563.66	0.331837
1565.52	0.323905
1567.38	0.316243
1569.25	0.308904
1571.11	0.302112
1572.98	0.295954
1574.84	0.290355
1576.7	0.285466
1578.57	0.281512
1580.43	0.278614
1582.29	0.276366
1584.16	0.274877
1586.02	0.275061
1587.89	0.276701
1589.75	0.279576
1591.61	0.283569
1593.48	0.288945
1595.34	0.296184
1597.2	0.304398
1599.07	0.313155
1600.93	0.322719
1602.8	0.333124
1604.66	0.34392
1606.52	0.354912
1608.39	0.365793
1610.25	0.376331
1612.11	0.386652
1613.98	0.397041
1615.84	0.407088
1617.71	0.416531
1619.57	0.425332
1621.43	0.433575
1623.3	0.441458
1625.16	0.448951
1627.02	0.455574
1628.89	0.461275
1630.75	0.466205
1632.62	0.469988
1634.48	0.472395
1636.34	0.473466
1638.21	0.473209
1640.07	0.471138
1641.93	0.466837
1643.8	0.461317
1645.66	0.454717
1647.52	0.446471
1649.39	0.436892
1651.25	0.426523
1653.12	0.415329
1654.98	0.403533
1656.84	0.391503
1658.71	0.379054
1660.57	0.365979
1662.43	0.352728
1664.3	0.339465
1666.16	0.326205
1668.03	0.312891
1669.89	0.29931
1671.75	0.285428
1673.62	0.271698
1675.48	0.258122
1677.34	0.244576
1679.21	0.231282
1681.07	0.218491
1682.94	0.206424
1684.8	0.195162
1686.66	0.18474
1688.53	0.175235
1690.39	0.166563
1692.25	0.158805
1694.12	0.152151
1695.98	0.14646
1697.85	0.141425
1699.71	0.137085
1701.57	0.133466
1703.44	0.130355
1705.3	0.127741
1707.16	0.125507
1709.03	0.123539
1710.89	0.121894
1712.75	0.120484
1714.62	0.119158
1716.48	0.11797
1718.35	0.116867
1720.21	0.11577
1722.07	0.114699
1723.94	0.113573
1725.8	0.112424
1727.66	0.111185
1729.53	0.109709
1731.39	0.10795
1733.26	0.10595
1735.12	0.103718
1736.98	0.101262
1738.85	0.098528
1740.71	0.095408
1742.57	0.091976
1744.44	0.088437
1746.3	0.084821
1748.17	0.081126
1750.03	0.077393
1751.89	0.073593
1753.76	0.069763
1755.62	0.065952
1757.48	0.062138
1759.35	0.05832
1761.21	0.05465
1763.08	0.051118
1764.94	0.047714
1766.8	0.044448
1768.67	0.041376
1770.53	0.038511
1772.39	0.035846
1774.26	0.03341
1776.12	0.031257
1777.98	0.029414
1779.85	0.027818
1781.71	0.026409
1783.58	0.025188
1785.44	0.024141
1787.3	0.023261
1789.17	0.022507
1791.03	0.021846
1792.89	0.021255
1794.76	0.020718
1796.62	0.020237
1798.49	0.019854
1800.35	0.01951
1802.21	0.019209
1804.08	0.018914
1805.94	0.018668
1807.8	0.018485
1809.67	0.018276
1811.53	0.01806
1813.4	0.017879
1815.26	0.017699
1817.12	0.01751
1818.99	0.017332
1820.85	0.017176
1822.71	0.017038
1824.58	0.016913
1826.44	0.016801
1828.31	0.016722
1830.17	0.016654
1832.03	0.01658
1833.9	0.016488
1835.76	0.016366
1837.62	0.016244
1839.49	0.016172
1841.35	0.016119
1843.21	0.016071
1845.08	0.016036
1846.94	0.016018
1848.81	0.015994
1850.67	0.01598
1852.53	0.015921
1854.4	0.015808
1856.26	0.015744
1858.12	0.015733
1859.99	0.015712
1861.85	0.015674
1863.72	0.015638
1865.58	0.01563
1867.44	0.015631
1869.31	0.015594
1871.17	0.015477
1873.03	0.015326
1874.9	0.015217
1876.76	0.015136
1878.63	0.015083
1880.49	0.015101
1882.35	0.015127
1884.22	0.015152
1886.08	0.015152
1887.94	0.015143
1889.81	0.01515
1891.67	0.015148
1893.54	0.01513
1895.4	0.015124
1897.26	0.015064
1899.13	0.014997
1900.99	0.014947
1902.85	0.014898
1904.72	0.014821
1906.58	0.014747
1908.44	0.014708
1910.31	0.014671
1912.17	0.014631
1914.04	0.014591
1915.9	0.014498
1917.76	0.014452
1919.63	0.014472
1921.49	0.014423
1923.35	0.014367
1925.22	0.014349
1927.08	0.014253
1928.95	0.014145
1930.81	0.01401
1932.67	0.013843
1934.54	0.013656
1936.4	0.013407
1938.26	0.013129
1940.13	0.012907
1941.99	0.012702
1943.86	0.01258
1945.72	0.012409
1947.58	0.012141
1949.45	0.011895
1951.31	0.011791
1953.17	0.011731
1955.04	0.011633
1956.9	0.011575
1958.77	0.011541
1960.63	0.011543
1962.49	0.011609
1964.36	0.01159
1966.22	0.011531
1968.08	0.01146
1969.95	0.011388
1971.81	0.011296
1973.68	0.011224
1975.54	0.01111
1977.4	0.011005
1979.27	0.010987
1981.13	0.011034
1982.99	0.011061
1984.86	0.01114
1986.72	0.011318
1988.58	0.011589
1990.45	0.011671
1992.31	0.011679
1994.18	0.011749
1996.04	0.011806
1997.9	0.011794
1999.77	0.011803
2001.63	0.011785
2003.49	0.011789
2005.36	0.011782
2007.22	0.011659
2009.09	0.011505
2010.95	0.011445
2012.81	0.011467
2014.68	0.011617
2016.54	0.011645
2018.4	0.011639
2020.27	0.011708
2022.13	0.011834
2024	0.011932
2025.86	0.012022
2027.72	0.012134
2029.59	0.012318
2031.45	0.012467
2033.31	0.012468
2035.18	0.012383
2037.04	0.012536
2038.91	0.012833
2040.77	0.013128
2042.63	0.013414
2044.5	0.013725
2046.36	0.013975
2048.22	0.014221
2050.09	0.0144
2051.95	0.014577
2053.81	0.014843
2055.68	0.015136
2057.54	0.015395
2059.41	0.015559
2061.27	0.015632
2063.13	0.015873
2065	0.016141
2066.86	0.01624
2068.72	0.016337
2070.59	0.016616
2072.45	0.016844
2074.32	0.01693
2076.18	0.016996
2078.04	0.017122
2079.91	0.017254
2081.77	0.017356
2083.63	0.017367
2085.5	0.01735
2087.36	0.017353
2089.23	0.017405
2091.09	0.017361
2092.95	0.017318
2094.82	0.017349
2096.68	0.017378
2098.54	0.01732
2100.41	0.017251
2102.27	0.0172
2104.14	0.017098
2106	0.016945
2107.86	0.01684
2109.73	0.016691
2111.59	0.016469
2113.45	0.016315
2115.32	0.016203
2117.18	0.016005
2119.04	0.015821
2120.91	0.015628
2122.77	0.01543
2124.64	0.015262
2126.5	0.015148
2128.36	0.014969
2130.23	0.01472
2132.09	0.014467
2133.95	0.014354
2135.82	0.014385
2137.68	0.014363
2139.55	0.014127
2141.41	0.013906
2143.27	0.013706
2145.14	0.013614
2147	0.013503
2148.86	0.013258
2150.73	0.013029
2152.59	0.012952
2154.46	0.012833
2156.32	0.012766
2158.18	0.012799
2160.05	0.01298
2161.91	0.013061
2163.77	0.012989
2165.64	0.012867
2167.5	0.01277
2169.37	0.012743
2171.23	0.012737
2173.09	0.012632
2174.96	0.012581
2176.82	0.012672
2178.68	0.012903
2180.55	0.013023
2182.41	0.012918
2184.27	0.012884
2186.14	0.013118
2188	0.013268
2189.87	0.01336
2191.73	0.013418
2193.59	0.013478
2195.46	0.013705
2197.32	0.014038
2199.18	0.014206
2201.05	0.014346
2202.91	0.0144
2204.78	0.014476
2206.64	0.014516
2208.5	0.014642
2210.37	0.014841
2212.23	0.014976
2214.09	0.015082
2215.96	0.015207
2217.82	0.015322
2219.69	0.015529
2221.55	0.015746
2223.41	0.015888
2225.28	0.015961
2227.14	0.016039
2229	0.016118
2230.87	0.016152
2232.73	0.016098
2234.6	0.0161
2236.46	0.016154
2238.32	0.016207
2240.19	0.016232
2242.05	0.016203
2243.91	0.016191
2245.78	0.01626
2247.64	0.016325
2249.5	0.016378
2251.37	0.016334
2253.23	0.016269
2255.1	0.016191
2256.96	0.016162
2258.82	0.016274
2260.69	0.016472
2262.55	0.016614
2264.41	0.016706
2266.28	0.016748
2268.14	0.016788
2270.01	0.016833
2271.87	0.01687
2273.73	0.016891
2275.6	0.016914
2277.46	0.01695
2279.32	0.017048
2281.19	0.017155
2283.05	0.017244
2284.92	0.017299
2286.78	0.017401
2288.64	0.01753
2290.51	0.017585
2292.37	0.017642
2294.23	0.017777
2296.1	0.017934
2297.96	0.01811
2299.83	0.018285
2301.69	0.018505
2303.55	0.018677
2305.42	0.018774
2307.28	0.018872
2309.14	0.018939
2311.01	0.018966
2312.87	0.019026
2314.74	0.019096
2316.6	0.019165
2318.46	0.01924
2320.33	0.019311
2322.19	0.019372
2324.05	0.019433
2325.92	0.019448
2327.78	0.019464
2329.64	0.019516
2331.51	0.019607
2333.37	0.0197
2335.24	0.019792
2337.1	0.019862
2338.96	0.019943
2340.83	0.020016
2342.69	0.020107
2344.55	0.020168
2346.42	0.020156
2348.28	0.020104
2350.15	0.020081
2352.01	0.020093
2353.87	0.020136
2355.74	0.020216
2357.6	0.020303
2359.46	0.020353
2361.33	0.020394
2363.19	0.020448
2365.06	0.020507
2366.92	0.02058
2368.78	0.020649
2370.65	0.020724
2372.51	0.020857
2374.37	0.020966
2376.24	0.021031
2378.1	0.021106
2379.97	0.021174
2381.83	0.021219
2383.69	0.021326
2385.56	0.021418
2387.42	0.021463
2389.28	0.021478
2391.15	0.021555
2393.01	0.021732
2394.87	0.02191
2396.74	0.022059
2398.6	0.022239
2400.47	0.022426
2402.33	0.022567
2404.19	0.022685
2406.06	0.022836
2407.92	0.022985
2409.78	0.02314
2411.65	0.023293
2413.51	0.023445
2415.38	0.023624
2417.24	0.023799
2419.1	0.023931
2420.97	0.024087
2422.83	0.024275
2424.69	0.02448
2426.56	0.024676
2428.42	0.024884
2430.29	0.02506
2432.15	0.025227
2434.01	0.02542
2435.88	0.025636
2437.74	0.025832
2439.6	0.025979
2441.47	0.026119
2443.33	0.026286
2445.2	0.026442
2447.06	0.026606
2448.92	0.026771
2450.79	0.026925
2452.65	0.027073
2454.51	0.02725
2456.38	0.027391
2458.24	0.027535
2460.1	0.027671
2461.97	0.0278
2463.83	0.027967
2465.7	0.028172
2467.56	0.028365
2469.42	0.028551
2471.29	0.028676
2473.15	0.028786
2475.01	0.028883
2476.88	0.029003
2478.74	0.02915
2480.61	0.029316
2482.47	0.029492
2484.33	0.029657
2486.2	0.029802
2488.06	0.029955
2489.92	0.030112
2491.79	0.030282
2493.65	0.030436
2495.52	0.030601
2497.38	0.03075
2499.24	0.030875
2501.11	0.030973
2502.97	0.031099
2504.83	0.031236
2506.7	0.031422
2508.56	0.031624
2510.43	0.031774
2512.29	0.031906
2514.15	0.032054
2516.02	0.032177
2517.88	0.032315
2519.74	0.032479
2521.61	0.032652
2523.47	0.032796
2525.33	0.03295
2527.2	0.033082
2529.06	0.033195
2530.93	0.033296
2532.79	0.033407
2534.65	0.033529
2536.52	0.03366
2538.38	0.033753
2540.24	0.03383
2542.11	0.03391
2543.97	0.034024
2545.84	0.034149
2547.7	0.03427
2549.56	0.034371
2551.43	0.034469
2553.29	0.034558
2555.15	0.034644
2557.02	0.034726
2558.88	0.034806
2560.75	0.034885
2562.61	0.034996
2564.47	0.035111
2566.34	0.035218
2568.2	0.035312
2570.06	0.035437
2571.93	0.035525
2573.79	0.035569
2575.66	0.035635
2577.52	0.035752
2579.38	0.035879
2581.25	0.036005
2583.11	0.036117
2584.97	0.036234
2586.84	0.036351
2588.7	0.036502
2590.56	0.036672
2592.43	0.03682
2594.29	0.036982
2596.16	0.037183
2598.02	0.037352
2599.88	0.03749
2601.75	0.037641
2603.61	0.037825
2605.47	0.038007
2607.34	0.038181
2609.2	0.038323
2611.07	0.038466
2612.93	0.03865
2614.79	0.038843
2616.66	0.038983
2618.52	0.03914
2620.38	0.039352
2622.25	0.039553
2624.11	0.039684
2625.98	0.039792
2627.84	0.039893
2629.7	0.040015
2631.57	0.040147
2633.43	0.040258
2635.29	0.040354
2637.16	0.040453
2639.02	0.04055
2640.89	0.040624
2642.75	0.040678
2644.61	0.040744
2646.48	0.040803
2648.34	0.040833
2650.2	0.040833
2652.07	0.04084
2653.93	0.040861
2655.79	0.040889
2657.66	0.040904
2659.52	0.040887
2661.39	0.040879
2663.25	0.040911
2665.11	0.040947
2666.98	0.040977
2668.84	0.041019
2670.7	0.041099
2672.57	0.04116
2674.43	0.041223
2676.3	0.041274
2678.16	0.041326
2680.02	0.041402
2681.89	0.041467
2683.75	0.041544
2685.61	0.041644
2687.48	0.041748
2689.34	0.041858
2691.21	0.041978
2693.07	0.042117
2694.93	0.042269
2696.8	0.042442
2698.66	0.04261
2700.52	0.04277
2702.39	0.042964
2704.25	0.043187
2706.12	0.043421
2707.98	0.043668
2709.84	0.043891
2711.71	0.044091
2713.57	0.044314
2715.43	0.044552
2717.3	0.044784
2719.16	0.045047
2721.03	0.045319
2722.89	0.045599
2724.75	0.045869
2726.62	0.046132
2728.48	0.046416
2730.34	0.046721
2732.21	0.047038
2734.07	0.047372
2735.93	0.047695
2737.8	0.048006
2739.66	0.048319
2741.53	0.04865
2743.39	0.049
2745.25	0.049358
2747.12	0.049719
2748.98	0.050073
2750.84	0.050419
2752.71	0.050771
2754.57	0.051132
2756.44	0.051534
2758.3	0.051983
2760.16	0.052402
2762.03	0.052804
2763.89	0.05323
2765.75	0.053658
2767.62	0.054095
2769.48	0.054561
2771.35	0.055046
2773.21	0.055541
2775.07	0.056048
2776.94	0.056553
2778.8	0.057069
2780.66	0.057576
2782.53	0.058099
2784.39	0.058646
2786.26	0.059179
2788.12	0.059704
2789.98	0.060238
2791.85	0.060773
2793.71	0.061316
2795.57	0.061867
2797.44	0.062434
2799.3	0.063005
2801.16	0.063572
2803.03	0.064127
2804.89	0.06469
2806.76	0.065293
2808.62	0.065921
2810.48	0.066559
2812.35	0.067205
2814.21	0.067865
2816.07	0.068568
2817.94	0.069354
2819.8	0.070208
2821.67	0.071112
2823.53	0.072084
2825.39	0.073147
2827.26	0.074329
2829.12	0.075579
2830.98	0.07682
2832.85	0.078024
2834.71	0.079177
2836.58	0.080295
2838.44	0.081376
2840.3	0.082408
2842.17	0.083423
2844.03	0.084454
2845.89	0.085509
2847.76	0.086595
2849.62	0.087678
2851.49	0.088738
2853.35	0.089791
2855.21	0.090827
2857.08	0.091808
2858.94	0.092767
2860.8	0.093701
2862.67	0.094554
2864.53	0.095326
2866.39	0.096032
2868.26	0.096664
2870.12	0.097215
2871.99	0.097684
2873.85	0.098108
2875.71	0.098525
2877.58	0.09897
2879.44	0.099497
2881.3	0.100116
2883.17	0.100822
2885.03	0.101666
2886.9	0.102636
2888.76	0.103716
2890.62	0.104907
2892.49	0.106199
2894.35	0.107583
2896.21	0.109062
2898.08	0.110616
2899.94	0.112194
2901.81	0.113778
2903.67	0.115383
2905.53	0.116966
2907.4	0.118523
2909.26	0.120067
2911.12	0.121544
2912.99	0.1229
2914.85	0.124127
2916.72	0.125249
2918.58	0.126262
2920.44	0.12713
2922.31	0.12787
2924.17	0.128505
2926.03	0.129034
2927.9	0.129454
2929.76	0.129766
2931.62	0.129974
2933.49	0.130072
2935.35	0.130033
2937.22	0.129834
2939.08	0.129461
2940.94	0.128913
2942.81	0.128216
2944.67	0.127391
2946.53	0.126481
2948.4	0.125534
2950.26	0.124583
2952.13	0.12364
2953.99	0.122705
2955.85	0.121773
2957.72	0.120885
2959.58	0.120102
2961.44	0.119408
2963.31	0.118753
2965.17	0.118078
2967.04	0.11739
2968.9	0.116703
2970.76	0.116042
2972.63	0.115389
2974.49	0.114728
2976.35	0.114076
2978.22	0.113404
2980.08	0.11271
2981.95	0.112021
2983.81	0.111327
2985.67	0.110632
2987.54	0.109986
2989.4	0.109389
2991.26	0.108824
2993.13	0.108312
2994.99	0.107843
2996.85	0.107383
2998.72	0.106953
3000.58	0.106581
3002.45	0.106249
3004.31	0.10593
3006.17	0.105656
3008.04	0.105448
3009.9	0.105328
3011.76	0.105352
3013.63	0.105534
3015.49	0.105834
3017.36	0.106219
3019.22	0.106709
3021.08	0.10732
3022.95	0.108033
3024.81	0.108843
3026.67	0.10976
3028.54	0.110758
3030.4	0.11183
3032.27	0.112985
3034.13	0.114193
3035.99	0.115453
3037.86	0.11674
3039.72	0.118021
3041.58	0.119278
3043.45	0.120584
3045.31	0.121945
3047.18	0.123299
3049.04	0.124628
3050.9	0.125936
3052.77	0.127194
3054.63	0.128412
3056.49	0.129602
3058.36	0.130755
3060.22	0.131831
3062.09	0.132816
3063.95	0.133744
3065.81	0.134586
3067.68	0.13535
3069.54	0.136025
3071.4	0.136596
3073.27	0.137071
3075.13	0.137445
3076.99	0.137698
3078.86	0.137863
3080.72	0.137962
3082.59	0.137949
3084.45	0.137865
3086.31	0.137771
3088.18	0.137692
3090.04	0.137544
3091.9	0.137282
3093.77	0.136968
3095.63	0.136714
3097.5	0.13654
3099.36	0.136416
3101.22	0.13631
3103.09	0.136161
3104.95	0.135993
3106.81	0.13587
3108.68	0.135824
3110.54	0.135821
3112.41	0.135878
3114.27	0.136
3116.13	0.136188
3118	0.13647
3119.86	0.13684
3121.72	0.137278
3123.59	0.137817
3125.45	0.138462
3127.32	0.139181
3129.18	0.140006
3131.04	0.140967
3132.91	0.142008
3134.77	0.143094
3136.63	0.144254
3138.5	0.145525
3140.36	0.146879
3142.22	0.148239
3144.09	0.149622
3145.95	0.151043
3147.82	0.1525
3149.68	0.154056
3151.54	0.155679
3153.41	0.157334
3155.27	0.15902
3157.13	0.160744
3159	0.16251
3160.86	0.164347
3162.73	0.166232
3164.59	0.168064
3166.45	0.169845
3168.32	0.171681
3170.18	0.173576
3172.04	0.175453
3173.91	0.177288
3175.77	0.179131
3177.64	0.180976
3179.5	0.182803
3181.36	0.184592
3183.23	0.186377
3185.09	0.18817
3186.95	0.189946
3188.82	0.191663
3190.68	0.193299
3192.55	0.194913
3194.41	0.196526
3196.27	0.198107
3198.14	0.199669
3200	0.201174
3201.86	0.202657
3203.73	0.204103
3205.59	0.205481
3207.45	0.206779
3209.32	0.208033
3211.18	0.209318
3213.05	0.210703
3214.91	0.212043
3216.77	0.213293
3218.64	0.214504
3220.5	0.21572
3222.36	0.216912
3224.23	0.218081
3226.09	0.219232
3227.96	0.220416
3229.82	0.221604
3231.68	0.222755
3233.55	0.223877
3235.41	0.225053
3237.27	0.226263
3239.14	0.227463
3241	0.228663
3242.87	0.229843
3244.73	0.230995
3246.59	0.232151
3248.46	0.233287
3250.32	0.234466
3252.18	0.235703
3254.05	0.236922
3255.91	0.238081
3257.78	0.239196
3259.64	0.240211
3261.5	0.241182
3263.37	0.242141
3265.23	0.243117
3267.09	0.244061
3268.96	0.24484
3270.82	0.24555
3272.68	0.246293
3274.55	0.246977
3276.41	0.247598
3278.28	0.248206
3280.14	0.248757
3282	0.249196
3283.87	0.249602
3285.73	0.249945
3287.59	0.250246
3289.46	0.250526
3291.32	0.250712
3293.19	0.250773
3295.05	0.250782
3296.91	0.25071
3298.78	0.250485
3300.64	0.250115
3302.5	0.249682
3304.37	0.249198
3306.23	0.248627
3308.1	0.247918
3309.96	0.247129
3311.82	0.246267
3313.69	0.245275
3315.55	0.244255
3317.41	0.243169
3319.28	0.241949
3321.14	0.240637
3323.01	0.239212
3324.87	0.237632
3326.73	0.235939
3328.6	0.234159
3330.46	0.232268
3332.32	0.230339
3334.19	0.228322
3336.05	0.226165
3337.91	0.223958
3339.78	0.221763
3341.64	0.219499
3343.51	0.217209
3345.37	0.214993
3347.23	0.212853
3349.1	0.210694
3350.96	0.20849
3352.82	0.206325
3354.69	0.20427
3356.55	0.202267
3358.42	0.200192
3360.28	0.198147
3362.14	0.196264
3364.01	0.194458
3365.87	0.192666
3367.73	0.19094
3369.6	0.189355
3371.46	0.187839
3373.33	0.186418
3375.19	0.185113
3377.05	0.183837
3378.92	0.182578
3380.78	0.181394
3382.64	0.180284
3384.51	0.179284
3386.37	0.178359
3388.24	0.177418
3390.1	0.176474
3391.96	0.17556
3393.83	0.174651
3395.69	0.173785
3397.55	0.17296
3399.42	0.172158
3401.28	0.171395
3403.15	0.170638
3405.01	0.169925
3406.87	0.169248
3408.74	0.16852
3410.6	0.167767
3412.46	0.166998
3414.33	0.166167
3416.19	0.165276
3418.05	0.164375
3419.92	0.163459
3421.78	0.162538
3423.65	0.161674
3425.51	0.160837
3427.37	0.15998
3429.24	0.15914
3431.1	0.158287
3432.96	0.157449
3434.83	0.156595
3436.69	0.155641
3438.56	0.154622
3440.42	0.153624
3442.28	0.152658
3444.15	0.151714
3446.01	0.150685
3447.87	0.149557
3449.74	0.148397
3451.6	0.147272
3453.47	0.146165
3455.33	0.145062
3457.19	0.143948
3459.06	0.142848
3460.92	0.14176
3462.78	0.140632
3464.65	0.139504
3466.51	0.138417
3468.38	0.13731
3470.24	0.136138
3472.1	0.134923
3473.97	0.133678
3475.83	0.132415
3477.69	0.131073
3479.56	0.129712
3481.42	0.128485
3483.28	0.127302
3485.15	0.126048
3487.01	0.124795
3488.88	0.123533
3490.74	0.12224
3492.6	0.120981
3494.47	0.119801
3496.33	0.118625
3498.19	0.11731
3500.06	0.115989
3501.92	0.114676
3503.79	0.113311
3505.65	0.111944
3507.51	0.110647
3509.38	0.109361
3511.24	0.108054
3513.1	0.106713
3514.97	0.105398
3516.83	0.10413
3518.7	0.102812
3520.56	0.10146
3522.42	0.100202
3524.29	0.099013
3526.15	0.097747
3528.01	0.096377
3529.88	0.095002
3531.74	0.093685
3533.61	0.092373
3535.47	0.091029
3537.33	0.089647
3539.2	0.088261
3541.06	0.086812
3542.92	0.085386
3544.79	0.084124
3546.65	0.082821
3548.51	0.081436
3550.38	0.080105
3552.24	0.078803
3554.11	0.077472
3555.97	0.076156
3557.83	0.074904
3559.7	0.073649
3561.56	0.072315
3563.42	0.070881
3565.29	0.06948
3567.15	0.068182
3569.02	0.066848
3570.88	0.065449
3572.74	0.064076
3574.61	0.062774
3576.47	0.061554
3578.33	0.060349
3580.2	0.059157
3582.06	0.057892
3583.93	0.05652
3585.79	0.055182
3587.65	0.05402
3589.52	0.052865
3591.38	0.051596
3593.24	0.050348
3595.11	0.049138
3596.97	0.047899
3598.84	0.046696
3600.7	0.04549
3602.56	0.044251
3604.43	0.042915
3606.29	0.041573
3608.15	0.040412
3610.02	0.03935
3611.88	0.038286
3613.74	0.037175
3615.61	0.036017
3617.47	0.034882
3619.34	0.033771
3621.2	0.032588
3623.06	0.031325
3624.93	0.030097
3626.79	0.02883
3628.65	0.027608
3630.52	0.026569
3632.38	0.025597
3634.25	0.024478
3636.11	0.023342
3637.97	0.022298
3639.84	0.021261
3641.7	0.020245
3643.56	0.019248
3645.43	0.01816
3647.29	0.017081
3649.16	0.016079
3651.02	0.015222
3652.88	0.014392
3654.75	0.013434
3656.61	0.012522
3658.47	0.011645
3660.34	0.010779
3662.2	0.009992
3664.07	0.00924
3665.93	0.008508
3667.79	0.007862
3669.66	0.007309
3671.52	0.006766
3673.38	0.006254
3675.25	0.0058
3677.11	0.005328
3678.97	0.004808
3680.84	0.004362
3682.7	0.003927
3684.57	0.003467
3686.43	0.003047
3688.29	0.002663
3690.16	0.002349
3692.02	0.002137
3693.88	0.001933
3695.75	0.001707
3697.61	0.001453
3699.48	0.001209
3701.34	0.000987
3703.2	0.000785
3705.07	0.000645
3706.93	0.000464
3708.79	0.000194
3710.66	-1.2e-05
3712.52	-0.000103
3714.39	-0.00016
3716.25	-0.000286
3718.11	-0.000435
3719.98	-0.000583
3721.84	-0.000745
3723.7	-0.000859
3725.57	-0.000983
3727.43	-0.001191
3729.3	-0.001318
3731.16	-0.001355
3733.02	-0.001357
3734.89	-0.001375
3736.75	-0.001415
3738.61	-0.001481
3740.48	-0.001541
3742.34	-0.00159
3744.21	-0.001619
3746.07	-0.00158
3747.93	-0.00147
3749.8	-0.001412
3751.66	-0.001421
3753.52	-0.001386
3755.39	-0.001287
3757.25	-0.00121
3759.11	-0.001247
3760.98	-0.001329
3762.84	-0.001304
3764.71	-0.001248
3766.57	-0.001212
3768.43	-0.001159
3770.3	-0.001131
3772.16	-0.00109
3774.02	-0.000993
3775.89	-0.000934
3777.75	-0.00089
3779.62	-0.000877
3781.48	-0.000851
3783.34	-0.00083
3785.21	-0.000824
3787.07	-0.000834
3788.93	-0.000833
3790.8	-0.000834
3792.66	-0.000896
3794.53	-0.001016
3796.39	-0.001131
3798.25	-0.001205
3800.12	-0.001227
3801.98	-0.001234
3803.84	-0.001267
3805.71	-0.00126
3807.57	-0.001233
3809.44	-0.001281
3811.3	-0.001362
3813.16	-0.001391
3815.03	-0.001407
3816.89	-0.001376
3818.75	-0.001277
3820.62	-0.001225
3822.48	-0.001242
3824.34	-0.001286
3826.21	-0.001289
3828.07	-0.001293
3829.94	-0.001378
3831.8	-0.001466
3833.66	-0.001454
3835.53	-0.001435
3837.39	-0.001429
3839.25	-0.001395
3841.12	-0.001385
3842.98	-0.001424
3844.85	-0.001426
3846.71	-0.001429
3848.57	-0.001432
3850.44	-0.001422
3852.3	-0.001421
3854.16	-0.001406
3856.03	-0.001372
3857.89	-0.001366
3859.76	-0.001383
3861.62	-0.001388
3863.48	-0.00141
3865.35	-0.00148
3867.21	-0.001485
3869.07	-0.001417
3870.94	-0.001356
3872.8	-0.001359
3874.67	-0.001378
3876.53	-0.001331
3878.39	-0.001283
3880.26	-0.00128
3882.12	-0.001237
3883.98	-0.00121
3885.85	-0.001199
3887.71	-0.001142
3889.57	-0.001065
3891.44	-0.001029
3893.3	-0.001007
3895.17	-0.000996
3897.03	-0.000972
3898.89	-0.000943
3900.76	-0.000938
3902.62	-0.000944
3904.48	-0.00089
3906.35	-0.000782
3908.21	-0.000688
3910.08	-0.000637
3911.94	-0.000595
3913.8	-0.000595
3915.67	-0.000629
3917.53	-0.000644
3919.39	-0.000628
3921.26	-0.000587
3923.12	-0.000544
3924.99	-0.00051
3926.85	-0.00047
3928.71	-0.000442
3930.58	-0.000409
3932.44	-0.000397
3934.3	-0.000403
3936.17	-0.000372
3938.03	-0.000339
3939.9	-0.000324
3941.76	-0.000317
3943.62	-0.000321
3945.49	-0.000319
3947.35	-0.000337
3949.21	-0.000355
3951.08	-0.000367
3952.94	-0.000403
3954.8	-0.000441
3956.67	-0.000458
3958.53	-0.000473
3960.4	-0.000487
3962.26	-0.00048
3964.12	-0.000455
3965.99	-0.00041
3967.85	-0.000369
3969.71	-0.000338
3971.58	-0.00032
3973.44	-0.00036
3975.31	-0.0004
3977.17	-0.00044
3979.03	-0.000456
3980.9	-0.00046
3982.76	-0.000468
3984.62	-0.000474
3986.49	-0.000485
3988.35	-0.00049
3990.22	-0.000486
3992.08	-0.000493
3993.94	-0.000487
3995.81	-0.000465
3997.67	-0.000455
3999.53	-0.00047

## Sheet: LaEC
XLabel	Wavenumber
YLabel	Absorbance
FileType	Absorbance
DisplayDirection	20300
PeakDirection	20310
799.534	0.075104
801.398	0.075085
803.262	0.07505
805.125	0.075011
806.989	0.074948
808.853	0.074812
810.716	0.074606
812.58	0.074385
814.444	0.074153
816.308	0.073906
818.171	0.073633
820.035	0.073355
821.899	0.07309
823.762	0.072845
825.626	0.072643
827.49	0.072443
829.354	0.072231
831.217	0.072044
833.081	0.071885
834.945	0.071682
836.808	0.071407
838.672	0.07113
840.536	0.070866
842.4	0.070598
844.263	0.070325
846.127	0.070056
847.991	0.069818
849.854	0.069602
851.718	0.069373
853.582	0.069149
855.446	0.068973
857.309	0.068843
859.173	0.068731
861.037	0.068644
862.9	0.068567
864.764	0.068482
866.628	0.068412
868.492	0.068365
870.355	0.068302
872.219	0.068214
874.083	0.068117
875.946	0.068014
877.81	0.067928
879.674	0.067884
881.538	0.067882
883.401	0.067903
885.265	0.06793
887.129	0.067985
888.992	0.068071
890.856	0.06819
892.72	0.068358
894.584	0.068528
896.447	0.068683
898.311	0.068872
900.175	0.069096
902.038	0.069322
903.902	0.069558
905.766	0.069796
907.63	0.070025
909.493	0.070293
911.357	0.07064
913.221	0.071004
915.084	0.071334
916.948	0.071658
918.812	0.071977
920.676	0.072275
922.539	0.072557
924.403	0.072803
926.267	0.072992
928.13	0.073146
929.994	0.073301
931.858	0.073445
933.722	0.073566
935.585	0.073675
937.449	0.073768
939.313	0.073848
941.176	0.07394
943.04	0.074064
944.904	0.074193
946.768	0.074329
948.631	0.074502
950.495	0.074697
952.359	0.074905
954.222	0.075102
956.086	0.075245
957.95	0.075336
959.814	0.075414
961.677	0.075501
963.541	0.075581
965.405	0.075673
967.268	0.075806
969.132	0.075983
970.996	0.076205
972.86	0.076475
974.723	0.076793
976.587	0.077159
978.451	0.077575
980.315	0.07804
982.178	0.07856
984.042	0.079133
985.906	0.079739
987.769	0.080381
989.633	0.081068
991.497	0.081791
993.361	0.082524
995.224	0.083274
997.088	0.084068
998.952	0.08493
1000.82	0.085892
1002.68	0.086965
1004.54	0.088137
1006.41	0.089386
1008.27	0.090698
1010.13	0.092065
1012	0.093438
1013.86	0.094767
1015.73	0.096062
1017.59	0.097347
1019.45	0.098616
1021.32	0.099842
1023.18	0.101007
1025.04	0.102088
1026.91	0.103056
1028.77	0.103904
1030.63	0.104642
1032.5	0.105271
1034.36	0.1058
1036.23	0.106239
1038.09	0.106605
1039.95	0.10692
1041.82	0.107201
1043.68	0.107444
1045.54	0.107618
1047.41	0.107724
1049.27	0.107797
1051.14	0.107845
1053	0.107873
1054.86	0.107882
1056.73	0.107874
1058.59	0.107844
1060.45	0.107788
1062.32	0.107694
1064.18	0.107533
1066.05	0.107306
1067.91	0.10703
1069.77	0.106716
1071.64	0.106388
1073.5	0.106071
1075.36	0.105773
1077.23	0.105498
1079.09	0.105245
1080.96	0.105016
1082.82	0.104821
1084.68	0.104678
1086.55	0.104605
1088.41	0.104607
1090.27	0.104689
1092.14	0.104876
1094	0.105158
1095.86	0.105514
1097.73	0.105932
1099.59	0.106386
1101.46	0.106858
1103.32	0.107342
1105.18	0.107842
1107.05	0.108336
1108.91	0.108784
1110.77	0.109159
1112.64	0.109446
1114.5	0.109628
1116.37	0.109695
1118.23	0.109648
1120.09	0.109515
1121.96	0.109309
1123.82	0.109062
1125.68	0.108807
1127.55	0.10856
1129.41	0.108335
1131.28	0.108128
1133.14	0.107918
1135	0.107687
1136.87	0.107405
1138.73	0.10704
1140.59	0.106563
1142.46	0.105963
1144.32	0.105247
1146.19	0.104448
1148.05	0.103609
1149.91	0.102757
1151.78	0.101918
1153.64	0.101146
1155.5	0.100501
1157.37	0.100017
1159.23	0.099714
1161.09	0.09962
1162.96	0.099744
1164.82	0.100076
1166.69	0.100612
1168.55	0.101351
1170.41	0.102254
1172.28	0.103289
1174.14	0.104433
1176	0.105647
1177.87	0.106904
1179.73	0.108176
1181.6	0.109431
1183.46	0.110654
1185.32	0.111845
1187.19	0.113009
1189.05	0.11416
1190.91	0.115307
1192.78	0.116469
1194.64	0.117657
1196.51	0.118879
1198.37	0.120163
1200.23	0.121541
1202.1	0.123008
1203.96	0.124559
1205.82	0.126196
1207.69	0.1279
1209.55	0.12963
1211.42	0.131336
1213.28	0.132972
1215.14	0.134479
1217.01	0.135814
1218.87	0.13694
1220.73	0.137821
1222.6	0.138454
1224.46	0.138844
1226.32	0.139017
1228.19	0.139016
1230.05	0.138877
1231.92	0.138632
1233.78	0.138296
1235.64	0.137876
1237.51	0.137372
1239.37	0.136763
1241.23	0.136044
1243.1	0.135216
1244.96	0.134248
1246.83	0.133121
1248.69	0.131851
1250.55	0.13045
1252.42	0.128926
1254.28	0.127302
1256.14	0.125606
1258.01	0.123872
1259.87	0.122119
1261.74	0.120364
1263.6	0.118625
1265.46	0.116927
1267.33	0.115291
1269.19	0.113734
1271.05	0.112283
1272.92	0.110942
1274.78	0.109704
1276.65	0.108561
1278.51	0.107505
1280.37	0.106535
1282.24	0.10564
1284.1	0.10481
1285.96	0.104029
1287.83	0.103295
1289.69	0.102629
1291.56	0.102025
1293.42	0.101454
1295.28	0.100916
1297.15	0.100413
1299.01	0.099919
1300.87	0.099419
1302.74	0.09894
1304.6	0.098516
1306.46	0.098166
1308.33	0.097921
1310.19	0.097788
1312.06	0.097748
1313.92	0.097802
1315.78	0.097971
1317.65	0.098211
1319.51	0.098407
1321.37	0.098541
1323.24	0.098636
1325.1	0.098695
1326.97	0.098714
1328.83	0.098685
1330.69	0.098631
1332.56	0.098587
1334.42	0.098542
1336.28	0.098468
1338.15	0.098431
1340.01	0.098544
1341.88	0.098731
1343.74	0.09891
1345.6	0.099156
1347.47	0.099447
1349.33	0.099727
1351.19	0.100057
1353.06	0.100392
1354.92	0.100631
1356.79	0.100791
1358.65	0.100879
1360.51	0.100872
1362.38	0.100776
1364.24	0.100695
1366.1	0.100698
1367.97	0.100703
1369.83	0.100726
1371.69	0.100881
1373.56	0.10116
1375.42	0.101522
1377.29	0.101962
1379.15	0.102376
1381.01	0.102794
1382.88	0.103267
1384.74	0.103666
1386.6	0.103875
1388.47	0.103975
1390.33	0.104005
1392.2	0.103893
1394.06	0.103732
1395.92	0.103702
1397.79	0.103613
1399.65	0.103336
1401.51	0.103049
1403.38	0.102741
1405.24	0.102445
1407.11	0.102282
1408.97	0.102182
1410.83	0.101997
1412.7	0.101941
1414.56	0.102317
1416.42	0.102799
1418.29	0.103179
1420.15	0.103577
1422.02	0.10404
1423.88	0.104575
1425.74	0.10529
1427.61	0.106016
1429.47	0.106611
1431.33	0.10713
1433.2	0.107739
1435.06	0.10856
1436.92	0.109195
1438.79	0.109566
1440.65	0.109797
1442.52	0.109862
1444.38	0.10973
1446.24	0.109477
1448.11	0.109108
1449.97	0.108775
1451.83	0.108392
1453.7	0.107815
1455.56	0.107075
1457.43	0.106292
1459.29	0.105361
1461.15	0.104052
1463.02	0.10266
1464.88	0.101394
1466.74	0.100287
1468.61	0.09922
1470.47	0.09795
1472.34	0.096586
1474.2	0.09553
1476.06	0.09478
1477.93	0.094108
1479.79	0.09331
1481.65	0.092365
1483.52	0.092234
1485.38	0.093226
1487.25	0.094211
1489.11	0.09516
1490.97	0.09632
1492.84	0.097855
1494.7	0.099791
1496.56	0.101854
1498.43	0.104314
1500.29	0.107249
1502.15	0.110361
1504.02	0.113715
1505.88	0.117191
1507.75	0.120696
1509.61	0.124392
1511.47	0.1283
1513.34	0.131867
1515.2	0.135243
1517.06	0.139176
1518.93	0.143504
1520.79	0.147386
1522.66	0.150926
1524.52	0.154294
1526.38	0.157645
1528.25	0.160851
1530.11	0.163263
1531.97	0.164658
1533.84	0.166001
1535.7	0.167563
1537.57	0.169031
1539.43	0.169765
1541.29	0.169922
1543.16	0.169701
1545.02	0.168927
1546.88	0.167678
1548.75	0.166144
1550.61	0.164186
1552.48	0.162064
1554.34	0.160007
1556.2	0.157611
1558.07	0.154752
1559.93	0.151961
1561.79	0.14924
1563.66	0.146066
1565.52	0.142483
1567.38	0.139089
1569.25	0.135906
1571.11	0.133022
1572.98	0.13034
1574.84	0.12787
1576.7	0.125765
1578.57	0.124068
1580.43	0.122774
1582.29	0.121528
1584.16	0.120544
1586.02	0.120439
1587.89	0.120932
1589.75	0.121863
1591.61	0.123237
1593.48	0.125213
1595.34	0.127926
1597.2	0.130976
1599.07	0.134265
1600.93	0.137928
1602.8	0.141992
1604.66	0.146325
1606.52	0.150778
1608.39	0.155153
1610.25	0.159459
1612.11	0.163904
1613.98	0.168518
1615.84	0.172878
1617.71	0.176966
1619.57	0.180836
1621.43	0.184547
1623.3	0.188274
1625.16	0.191917
1627.02	0.195097
1628.89	0.198046
1630.75	0.201132
1632.62	0.203682
1634.48	0.205556
1636.34	0.20695
1638.21	0.207866
1640.07	0.208029
1641.93	0.207261
1643.8	0.206015
1645.66	0.204312
1647.52	0.201866
1649.39	0.19877
1651.25	0.195239
1653.12	0.191313
1654.98	0.187059
1656.84	0.182567
1658.71	0.177652
1660.57	0.172395
1662.43	0.167155
1664.3	0.1618
1666.16	0.156408
1668.03	0.150923
1669.89	0.145118
1671.75	0.139126
1673.62	0.133332
1675.48	0.127421
1677.34	0.121102
1679.21	0.114936
1681.07	0.109069
1682.94	0.103479
1684.8	0.098138
1686.66	0.093045
1688.53	0.088371
1690.39	0.084107
1692.25	0.080171
1694.12	0.076672
1695.98	0.073658
1697.85	0.070902
1699.71	0.068438
1701.57	0.066385
1703.44	0.064612
1705.3	0.063068
1707.16	0.061608
1709.03	0.060271
1710.89	0.059284
1712.75	0.058457
1714.62	0.057662
1716.48	0.05699
1718.35	0.056345
1720.21	0.055671
1722.07	0.055047
1723.94	0.0544
1725.8	0.053762
1727.66	0.053106
1729.53	0.052351
1731.39	0.051499
1733.26	0.050586
1735.12	0.049584
1736.98	0.048484
1738.85	0.047286
1740.71	0.045919
1742.57	0.044434
1744.44	0.042958
1746.3	0.041469
1748.17	0.039947
1750.03	0.038421
1751.89	0.036877
1753.76	0.035357
1755.62	0.033846
1757.48	0.032259
1759.35	0.030654
1761.21	0.029147
1763.08	0.027673
1764.94	0.026258
1766.8	0.024933
1768.67	0.023723
1770.53	0.022589
1772.39	0.021527
1774.26	0.020582
1776.12	0.01976
1777.98	0.019058
1779.85	0.018456
1781.71	0.017968
1783.58	0.017564
1785.44	0.017199
1787.3	0.016886
1789.17	0.016618
1791.03	0.01641
1792.89	0.016234
1794.76	0.016063
1796.62	0.0159
1798.49	0.015781
1800.35	0.015654
1802.21	0.015554
1804.08	0.01549
1805.94	0.015446
1807.8	0.015411
1809.67	0.015372
1811.53	0.015338
1813.4	0.015293
1815.26	0.015236
1817.12	0.015221
1818.99	0.015217
1820.85	0.015192
1822.71	0.015182
1824.58	0.015185
1826.44	0.015177
1828.31	0.015172
1830.17	0.015175
1832.03	0.01517
1833.9	0.015172
1835.76	0.0152
1837.62	0.015224
1839.49	0.015229
1841.35	0.015246
1843.21	0.015275
1845.08	0.015305
1846.94	0.015366
1848.81	0.015405
1850.67	0.015394
1852.53	0.015359
1854.4	0.015364
1856.26	0.015397
1858.12	0.015411
1859.99	0.01544
1861.85	0.015489
1863.72	0.015487
1865.58	0.015464
1867.44	0.015478
1869.31	0.015476
1871.17	0.015463
1873.03	0.015451
1874.9	0.015432
1876.76	0.015446
1878.63	0.015464
1880.49	0.01548
1882.35	0.015467
1884.22	0.015448
1886.08	0.015442
1887.94	0.015428
1889.81	0.015407
1891.67	0.015404
1893.54	0.015364
1895.4	0.015304
1897.26	0.015242
1899.13	0.015176
1900.99	0.015123
1902.85	0.015043
1904.72	0.014959
1906.58	0.014904
1908.44	0.014864
1910.31	0.014855
1912.17	0.014845
1914.04	0.014783
1915.9	0.014731
1917.76	0.014684
1919.63	0.014641
1921.49	0.014564
1923.35	0.014406
1925.22	0.014304
1927.08	0.014207
1928.95	0.01409
1930.81	0.014023
1932.67	0.014043
1934.54	0.014
1936.4	0.013881
1938.26	0.01374
1940.13	0.013672
1941.99	0.013624
1943.86	0.013622
1945.72	0.013592
1947.58	0.013465
1949.45	0.013352
1951.31	0.01332
1953.17	0.013289
1955.04	0.013226
1956.9	0.013146
1958.77	0.013089
1960.63	0.013015
1962.49	0.012931
1964.36	0.012928
1966.22	0.013007
1968.08	0.013039
1969.95	0.013072
1971.81	0.013045
1973.68	0.013005
1975.54	0.01302
1977.4	0.012986
1979.27	0.012845
1981.13	0.012822
1982.99	0.012872
1984.86	0.012931
1986.72	0.01303
1988.58	0.01323
1990.45	0.013252
1992.31	0.013238
1994.18	0.013304
1996.04	0.013323
1997.9	0.013237
1999.77	0.013182
2001.63	0.013195
2003.49	0.013127
2005.36	0.013072
2007.22	0.013082
2009.09	0.013027
2010.95	0.012942
2012.81	0.01284
2014.68	0.012805
2016.54	0.012822
2018.4	0.012942
2020.27	0.013082
2022.13	0.013166
2024	0.013283
2025.86	0.013463
2027.72	0.013546
2029.59	0.013627
2031.45	0.013822
2033.31	0.013905
2035.18	0.013888
2037.04	0.014119
2038.91	0.0144
2040.77	0.014518
2042.63	0.014633
2044.5	0.014836
2046.36	0.015013
2048.22	0.015098
2050.09	0.015261
2051.95	0.015459
2053.81	0.015692
2055.68	0.016008
2057.54	0.016292
2059.41	0.016532
2061.27	0.016723
2063.13	0.016868
2065	0.016968
2066.86	0.017102
2068.72	0.017228
2070.59	0.017297
2072.45	0.017345
2074.32	0.017431
2076.18	0.017503
2078.04	0.017424
2079.91	0.017339
2081.77	0.017351
2083.63	0.017315
2085.5	0.017316
2087.36	0.017466
2089.23	0.017618
2091.09	0.017685
2092.95	0.017735
2094.82	0.017799
2096.68	0.01785
2098.54	0.017877
2100.41	0.01787
2102.27	0.01782
2104.14	0.017736
2106	0.017619
2107.86	0.017558
2109.73	0.01749
2111.59	0.017343
2113.45	0.017227
2115.32	0.017136
2117.18	0.017015
2119.04	0.016908
2120.91	0.016795
2122.77	0.016697
2124.64	0.016607
2126.5	0.016509
2128.36	0.016371
2130.23	0.016241
2132.09	0.01601
2133.95	0.015614
2135.82	0.015293
2137.68	0.015224
2139.55	0.015186
2141.41	0.015069
2143.27	0.015024
2145.14	0.014937
2147	0.014759
2148.86	0.014683
2150.73	0.014676
2152.59	0.014632
2154.46	0.014668
2156.32	0.014741
2158.18	0.014721
2160.05	0.014684
2161.91	0.014751
2163.77	0.014881
2165.64	0.014837
2167.5	0.014792
2169.37	0.014826
2171.23	0.014886
2173.09	0.015007
2174.96	0.015147
2176.82	0.015216
2178.68	0.015448
2180.55	0.015898
2182.41	0.016251
2184.27	0.016318
2186.14	0.016314
2188	0.016385
2189.87	0.016453
2191.73	0.016507
2193.59	0.016599
2195.46	0.016714
2197.32	0.016783
2199.18	0.016876
2201.05	0.016873
2202.91	0.016868
2204.78	0.017062
2206.64	0.017247
2208.5	0.017312
2210.37	0.017295
2212.23	0.017386
2214.09	0.017602
2215.96	0.017818
2217.82	0.01796
2219.69	0.01806
2221.55	0.018101
2223.41	0.018199
2225.28	0.018232
2227.14	0.018145
2229	0.018076
2230.87	0.018095
2232.73	0.018155
2234.6	0.018194
2236.46	0.018203
2238.32	0.01828
2240.19	0.01838
2242.05	0.018416
2243.91	0.018504
2245.78	0.01868
2247.64	0.018866
2249.5	0.019019
2251.37	0.019075
2253.23	0.019069
2255.1	0.019107
2256.96	0.019244
2258.82	0.019401
2260.69	0.019466
2262.55	0.019475
2264.41	0.01957
2266.28	0.019675
2268.14	0.019767
2270.01	0.019827
2271.87	0.019898
2273.73	0.020009
2275.6	0.02018
2277.46	0.020332
2279.32	0.020481
2281.19	0.020692
2283.05	0.020851
2284.92	0.020959
2286.78	0.021113
2288.64	0.02125
2290.51	0.021311
2292.37	0.021279
2294.23	0.021284
2296.1	0.02137
2297.96	0.021469
2299.83	0.021575
2301.69	0.021693
2303.55	0.021791
2305.42	0.021869
2307.28	0.021907
2309.14	0.021918
2311.01	0.021897
2312.87	0.021875
2314.74	0.02189
2316.6	0.021933
2318.46	0.021968
2320.33	0.022032
2322.19	0.0221
2324.05	0.02216
2325.92	0.022156
2327.78	0.022118
2329.64	0.022116
2331.51	0.022114
2333.37	0.022108
2335.24	0.022091
2337.1	0.022084
2338.96	0.022124
2340.83	0.022135
2342.69	0.022127
2344.55	0.022118
2346.42	0.022102
2348.28	0.022118
2350.15	0.022148
2352.01	0.022161
2353.87	0.022197
2355.74	0.022253
2357.6	0.022318
2359.46	0.022378
2361.33	0.022427
2363.19	0.022461
2365.06	0.022502
2366.92	0.022526
2368.78	0.022528
2370.65	0.022524
2372.51	0.022542
2374.37	0.022573
2376.24	0.022633
2378.1	0.022716
2379.97	0.022785
2381.83	0.022871
2383.69	0.022971
2385.56	0.023046
2387.42	0.023137
2389.28	0.023202
2391.15	0.023255
2393.01	0.023329
2394.87	0.023371
2396.74	0.023392
2398.6	0.023456
2400.47	0.02351
2402.33	0.023555
2404.19	0.023601
2406.06	0.023659
2407.92	0.023719
2409.78	0.023778
2411.65	0.02385
2413.51	0.023921
2415.38	0.023994
2417.24	0.024097
2419.1	0.024235
2420.97	0.024354
2422.83	0.024412
2424.69	0.024464
2426.56	0.024533
2428.42	0.024583
2430.29	0.024609
2432.15	0.024655
2434.01	0.024719
2435.88	0.0248
2437.74	0.024913
2439.6	0.025015
2441.47	0.02509
2443.33	0.025176
2445.2	0.025284
2447.06	0.025406
2448.92	0.025506
2450.79	0.025601
2452.65	0.025704
2454.51	0.025811
2456.38	0.02589
2458.24	0.025938
2460.1	0.026005
2461.97	0.026081
2463.83	0.026141
2465.7	0.026196
2467.56	0.026265
2469.42	0.026348
2471.29	0.02643
2473.15	0.026499
2475.01	0.026539
2476.88	0.026601
2478.74	0.026679
2480.61	0.026728
2482.47	0.02677
2484.33	0.026813
2486.2	0.026859
2488.06	0.026905
2489.92	0.026984
2491.79	0.027061
2493.65	0.027114
2495.52	0.027165
2497.38	0.027221
2499.24	0.02728
2501.11	0.027317
2502.97	0.027356
2504.83	0.027406
2506.7	0.027427
2508.56	0.027442
2510.43	0.027481
2512.29	0.027532
2514.15	0.027589
2516.02	0.027639
2517.88	0.027668
2519.74	0.027706
2521.61	0.027789
2523.47	0.027834
2525.33	0.027823
2527.2	0.027833
2529.06	0.027878
2530.93	0.027925
2532.79	0.027975
2534.65	0.028037
2536.52	0.028071
2538.38	0.028068
2540.24	0.028097
2542.11	0.028148
2543.97	0.028208
2545.84	0.028281
2547.7	0.028343
2549.56	0.028393
2551.43	0.028465
2553.29	0.028557
2555.15	0.028633
2557.02	0.028675
2558.88	0.028705
2560.75	0.028768
2562.61	0.02888
2564.47	0.028979
2566.34	0.029038
2568.2	0.029076
2570.06	0.029121
2571.93	0.029219
2573.79	0.029355
2575.66	0.029473
2577.52	0.029572
2579.38	0.029653
2581.25	0.029685
2583.11	0.029705
2584.97	0.02977
2586.84	0.029848
2588.7	0.029954
2590.56	0.030048
2592.43	0.03009
2594.29	0.030144
2596.16	0.030243
2598.02	0.030332
2599.88	0.030392
2601.75	0.030451
2603.61	0.030531
2605.47	0.030613
2607.34	0.030665
2609.2	0.030717
2611.07	0.030835
2612.93	0.030954
2614.79	0.031052
2616.66	0.031171
2618.52	0.031289
2620.38	0.031354
2622.25	0.031393
2624.11	0.031445
2625.98	0.031518
2627.84	0.031653
2629.7	0.031788
2631.57	0.031884
2633.43	0.031982
2635.29	0.032041
2637.16	0.032096
2639.02	0.032173
2640.89	0.032229
2642.75	0.032261
2644.61	0.032285
2646.48	0.032329
2648.34	0.032392
2650.2	0.03245
2652.07	0.032502
2653.93	0.032532
2655.79	0.032538
2657.66	0.03252
2659.52	0.032538
2661.39	0.032573
2663.25	0.032597
2665.11	0.032608
2666.98	0.032614
2668.84	0.032647
2670.7	0.032679
2672.57	0.03269
2674.43	0.032684
2676.3	0.032688
2678.16	0.032704
2680.02	0.032709
2681.89	0.032722
2683.75	0.03276
2685.61	0.032812
2687.48	0.032852
2689.34	0.032884
2691.21	0.032944
2693.07	0.033018
2694.93	0.033092
2696.8	0.033167
2698.66	0.033241
2700.52	0.033316
2702.39	0.033404
2704.25	0.03351
2706.12	0.033615
2707.98	0.033733
2709.84	0.033864
2711.71	0.033988
2713.57	0.034109
2715.43	0.034223
2717.3	0.034339
2719.16	0.034461
2721.03	0.034573
2722.89	0.034686
2724.75	0.034808
2726.62	0.034949
2728.48	0.035107
2730.34	0.035233
2732.21	0.035343
2734.07	0.035487
2735.93	0.035645
2737.8	0.035795
2739.66	0.035942
2741.53	0.036079
2743.39	0.036221
2745.25	0.036361
2747.12	0.036505
2748.98	0.03664
2750.84	0.036752
2752.71	0.036882
2754.57	0.037038
2756.44	0.037198
2758.3	0.037371
2760.16	0.037545
2762.03	0.037706
2763.89	0.037873
2765.75	0.038055
2767.62	0.038253
2769.48	0.038456
2771.35	0.038653
2773.21	0.038811
2775.07	0.038954
2776.94	0.039132
2778.8	0.039357
2780.66	0.03959
2782.53	0.039787
2784.39	0.039963
2786.26	0.040152
2788.12	0.04037
2789.98	0.040591
2791.85	0.040821
2793.71	0.041061
2795.57	0.041308
2797.44	0.041571
2799.3	0.041811
2801.16	0.04202
2803.03	0.042247
2804.89	0.042474
2806.76	0.042689
2808.62	0.042939
2810.48	0.043215
2812.35	0.043505
2814.21	0.043816
2816.07	0.044146
2817.94	0.044507
2819.8	0.044921
2821.67	0.045398
2823.53	0.045931
2825.39	0.046482
2827.26	0.047069
2829.12	0.04771
2830.98	0.048333
2832.85	0.04889
2834.71	0.049422
2836.58	0.049922
2838.44	0.050368
2840.3	0.050783
2842.17	0.051183
2844.03	0.051584
2845.89	0.052005
2847.76	0.052428
2849.62	0.052822
2851.49	0.053215
2853.35	0.053635
2855.21	0.054029
2857.08	0.054395
2858.94	0.054745
2860.8	0.055063
2862.67	0.055343
2864.53	0.05559
2866.39	0.055816
2868.26	0.055993
2870.12	0.056119
2871.99	0.056217
2873.85	0.056275
2875.71	0.056321
2877.58	0.056411
2879.44	0.056564
2881.3	0.056749
2883.17	0.057027
2885.03	0.057406
2886.9	0.057828
2888.76	0.058318
2890.62	0.058878
2892.49	0.059475
2894.35	0.060128
2896.21	0.060811
2898.08	0.061493
2899.94	0.062184
2901.81	0.06289
2903.67	0.063582
2905.53	0.064243
2907.4	0.064863
2909.26	0.065422
2911.12	0.065941
2912.99	0.066387
2914.85	0.066751
2916.72	0.067055
2918.58	0.067271
2920.44	0.06743
2922.31	0.067553
2924.17	0.067622
2926.03	0.06764
2927.9	0.067618
2929.76	0.067531
2931.62	0.067387
2933.49	0.067217
2935.35	0.066975
2937.22	0.066655
2939.08	0.066283
2940.94	0.065843
2942.81	0.065317
2944.67	0.064731
2946.53	0.064119
2948.4	0.063491
2950.26	0.062866
2952.13	0.062225
2953.99	0.061605
2955.85	0.061049
2957.72	0.060533
2959.58	0.060062
2961.44	0.059634
2963.31	0.059204
2965.17	0.058808
2967.04	0.058419
2968.9	0.058017
2970.76	0.057616
2972.63	0.057232
2974.49	0.056853
2976.35	0.05648
2978.22	0.056105
2980.08	0.055706
2981.95	0.055316
2983.81	0.054921
2985.67	0.054491
2987.54	0.054073
2989.4	0.053728
2991.26	0.053427
2993.13	0.053123
2994.99	0.052843
2996.85	0.0526
2998.72	0.052391
3000.58	0.052208
3002.45	0.052062
3004.31	0.051926
3006.17	0.051798
3008.04	0.051702
3009.9	0.051668
3011.76	0.051681
3013.63	0.051755
3015.49	0.051879
3017.36	0.052023
3019.22	0.052195
3021.08	0.052426
3022.95	0.052674
3024.81	0.052945
3026.67	0.053276
3028.54	0.053638
3030.4	0.054001
3032.27	0.054383
3034.13	0.054792
3035.99	0.055223
3037.86	0.05566
3039.72	0.056095
3041.58	0.056525
3043.45	0.056929
3045.31	0.057325
3047.18	0.057732
3049.04	0.058102
3050.9	0.058452
3052.77	0.058808
3054.63	0.059157
3056.49	0.059472
3058.36	0.059782
3060.22	0.060055
3062.09	0.060305
3063.95	0.060564
3065.81	0.060797
3067.68	0.060964
3069.54	0.061097
3071.4	0.061208
3073.27	0.061231
3075.13	0.061209
3076.99	0.061205
3078.86	0.061188
3080.72	0.061147
3082.59	0.061052
3084.45	0.060922
3086.31	0.060824
3088.18	0.060699
3090.04	0.060539
3091.9	0.060386
3093.77	0.060238
3095.63	0.060117
3097.5	0.059993
3099.36	0.05985
3101.22	0.059737
3103.09	0.059645
3104.95	0.059544
3106.81	0.059447
3108.68	0.059346
3110.54	0.059279
3112.41	0.059255
3114.27	0.059255
3116.13	0.059285
3118	0.059325
3119.86	0.05943
3121.72	0.059578
3123.59	0.059723
3125.45	0.059895
3127.32	0.060052
3129.18	0.060243
3131.04	0.060497
3132.91	0.060752
3134.77	0.061039
3136.63	0.061387
3138.5	0.061762
3140.36	0.062149
3142.22	0.06253
3144.09	0.06296
3145.95	0.063442
3147.82	0.063875
3149.68	0.064295
3151.54	0.064759
3153.41	0.065259
3155.27	0.06577
3157.13	0.066275
3159	0.066756
3160.86	0.067242
3162.73	0.06775
3164.59	0.068302
3166.45	0.068858
3168.32	0.069392
3170.18	0.06994
3172.04	0.070523
3173.91	0.071075
3175.77	0.071588
3177.64	0.072127
3179.5	0.072682
3181.36	0.073219
3183.23	0.073734
3185.09	0.074267
3186.95	0.074808
3188.82	0.075339
3190.68	0.075852
3192.55	0.076341
3194.41	0.076846
3196.27	0.077328
3198.14	0.07775
3200	0.078185
3201.86	0.078657
3203.73	0.079089
3205.59	0.07951
3207.45	0.079945
3209.32	0.080328
3211.18	0.08064
3213.05	0.080956
3214.91	0.081314
3216.77	0.081669
3218.64	0.081992
3220.5	0.082346
3222.36	0.082724
3224.23	0.083072
3226.09	0.083422
3227.96	0.083793
3229.82	0.084163
3231.68	0.084507
3233.55	0.084853
3235.41	0.085185
3237.27	0.085474
3239.14	0.085789
3241	0.086133
3242.87	0.086513
3244.73	0.086928
3246.59	0.087293
3248.46	0.087597
3250.32	0.087938
3252.18	0.088296
3254.05	0.088659
3255.91	0.08907
3257.78	0.089503
3259.64	0.089907
3261.5	0.090247
3263.37	0.090553
3265.23	0.09084
3267.09	0.091154
3268.96	0.091481
3270.82	0.091772
3272.68	0.092015
3274.55	0.092243
3276.41	0.092446
3278.28	0.092611
3280.14	0.092726
3282	0.092804
3283.87	0.092885
3285.73	0.092928
3287.59	0.092958
3289.46	0.093001
3291.32	0.092996
3293.19	0.092957
3295.05	0.09292
3296.91	0.09287
3298.78	0.092787
3300.64	0.092625
3302.5	0.092409
3304.37	0.092173
3306.23	0.091903
3308.1	0.091604
3309.96	0.091259
3311.82	0.09086
3313.69	0.090417
3315.55	0.089966
3317.41	0.089506
3319.28	0.088991
3321.14	0.088425
3323.01	0.087823
3324.87	0.087186
3326.73	0.086557
3328.6	0.085969
3330.46	0.085343
3332.32	0.084639
3334.19	0.08388
3336.05	0.083089
3337.91	0.082308
3339.78	0.081501
3341.64	0.080647
3343.51	0.079721
3345.37	0.078788
3347.23	0.077915
3349.1	0.077079
3350.96	0.076197
3352.82	0.075292
3354.69	0.07444
3356.55	0.073637
3358.42	0.072841
3360.28	0.072053
3362.14	0.071293
3364.01	0.070545
3365.87	0.069825
3367.73	0.069126
3369.6	0.068449
3371.46	0.067827
3373.33	0.067168
3375.19	0.066503
3377.05	0.065934
3378.92	0.065403
3380.78	0.064872
3382.64	0.064349
3384.51	0.063848
3386.37	0.063389
3388.24	0.062959
3390.1	0.062544
3391.96	0.062139
3393.83	0.061756
3395.69	0.061421
3397.55	0.061159
3399.42	0.060917
3401.28	0.060643
3403.15	0.060323
3405.01	0.06002
3406.87	0.059737
3408.74	0.059416
3410.6	0.059076
3412.46	0.058764
3414.33	0.058508
3416.19	0.058312
3418.05	0.058101
3419.92	0.057836
3421.78	0.057503
3423.65	0.057132
3425.51	0.056813
3427.37	0.056484
3429.24	0.056115
3431.1	0.055746
3432.96	0.05542
3434.83	0.055154
3436.69	0.054931
3438.56	0.054691
3440.42	0.054382
3442.28	0.053992
3444.15	0.053592
3446.01	0.053212
3447.87	0.052834
3449.74	0.052465
3451.6	0.052085
3453.47	0.051681
3455.33	0.051277
3457.19	0.050871
3459.06	0.050475
3460.92	0.050068
3462.78	0.049587
3464.65	0.049109
3466.51	0.048744
3468.38	0.048395
3470.24	0.048028
3472.1	0.047701
3473.97	0.047409
3475.83	0.047097
3477.69	0.046765
3479.56	0.046389
3481.42	0.045955
3483.28	0.04551
3485.15	0.045078
3487.01	0.044675
3488.88	0.04428
3490.74	0.043862
3492.6	0.043418
3494.47	0.042958
3496.33	0.042531
3498.19	0.042165
3500.06	0.041797
3501.92	0.041435
3503.79	0.041135
3505.65	0.040856
3507.51	0.040528
3509.38	0.040115
3511.24	0.039661
3513.1	0.039255
3514.97	0.038929
3516.83	0.038522
3518.7	0.038012
3520.56	0.037541
3522.42	0.037141
3524.29	0.036737
3526.15	0.036327
3528.01	0.035919
3529.88	0.035465
3531.74	0.035013
3533.61	0.034592
3535.47	0.034176
3537.33	0.033746
3539.2	0.033331
3541.06	0.032937
3542.92	0.032565
3544.79	0.032178
3546.65	0.031786
3548.51	0.031366
3550.38	0.030896
3552.24	0.030387
3554.11	0.029904
3555.97	0.029515
3557.83	0.029151
3559.7	0.028728
3561.56	0.028249
3563.42	0.027782
3565.29	0.027358
3567.15	0.026943
3569.02	0.026484
3570.88	0.026028
3572.74	0.02563
3574.61	0.025247
3576.47	0.024899
3578.33	0.024583
3580.2	0.024218
3582.06	0.02384
3583.93	0.02351
3585.79	0.023181
3587.65	0.022854
3589.52	0.022517
3591.38	0.022187
3593.24	0.021815
3595.11	0.021408
3596.97	0.021023
3598.84	0.020637
3600.7	0.020228
3602.56	0.019849
3604.43	0.019479
3606.29	0.01908
3608.15	0.018778
3610.02	0.01857
3611.88	0.018365
3613.74	0.018117
3615.61	0.017853
3617.47	0.017545
3619.34	0.017197
3621.2	0.016911
3623.06	0.016669
3624.93	0.016401
3626.79	0.016181
3628.65	0.015983
3630.52	0.015688
3632.38	0.015368
3634.25	0.015053
3636.11	0.014725
3637.97	0.014406
3639.84	0.014177
3641.7	0.013969
3643.56	0.013735
3645.43	0.013513
3647.29	0.013263
3649.16	0.013041
3651.02	0.012892
3652.88	0.012751
3654.75	0.012554
3656.61	0.012339
3658.47	0.01207
3660.34	0.011815
3662.2	0.011619
3664.07	0.011482
3665.93	0.011385
3667.79	0.011273
3669.66	0.011138
3671.52	0.01099
3673.38	0.010786
3675.25	0.010597
3677.11	0.01049
3678.97	0.010395
3680.84	0.010312
3682.7	0.010226
3684.57	0.010144
3686.43	0.01005
3688.29	0.010024
3690.16	0.010077
3692.02	0.010089
3693.88	0.010093
3695.75	0.010068
3697.61	0.009975
3699.48	0.009894
3701.34	0.009832
3703.2	0.009837
3705.07	0.009962
3706.93	0.010046
3708.79	0.010054
3710.66	0.009991
3712.52	0.009895
3714.39	0.009854
3716.25	0.009816
3718.11	0.009801
3719.98	0.009849
3721.84	0.009889
3723.7	0.009937
3725.57	0.00998
3727.43	0.009972
3729.3	0.00998
3731.16	0.00999
3733.02	0.009967
3734.89	0.009914
3736.75	0.009851
3738.61	0.009855
3740.48	0.009879
3742.34	0.0099
3744.21	0.009969
3746.07	0.010047
3747.93	0.010107
3749.8	0.010101
3751.66	0.010007
3753.52	0.009948
3755.39	0.009958
3757.25	0.010043
3759.11	0.010142
3760.98	0.010162
3762.84	0.010198
3764.71	0.01025
3766.57	0.010237
3768.43	0.010195
3770.3	0.010161
3772.16	0.010153
3774.02	0.010193
3775.89	0.010217
3777.75	0.010209
3779.62	0.010256
3781.48	0.010319
3783.34	0.010329
3785.21	0.010325
3787.07	0.010385
3788.93	0.010414
3790.8	0.01035
3792.66	0.010309
3794.53	0.010325
3796.39	0.010344
3798.25	0.010376
3800.12	0.01045
3801.98	0.010538
3803.84	0.010564
3805.71	0.010539
3807.57	0.01053
3809.44	0.010532
3811.3	0.010531
3813.16	0.01056
3815.03	0.010594
3816.89	0.010598
3818.75	0.010575
3820.62	0.010536
3822.48	0.01053
3824.34	0.010561
3826.21	0.010572
3828.07	0.01056
3829.94	0.010558
3831.8	0.010594
3833.66	0.010594
3835.53	0.010585
3837.39	0.010631
3839.25	0.010671
3841.12	0.010657
3842.98	0.010674
3844.85	0.01069
3846.71	0.010643
3848.57	0.010612
3850.44	0.010644
3852.3	0.010703
3854.16	0.010731
3856.03	0.010719
3857.89	0.010686
3859.76	0.010683
3861.62	0.010694
3863.48	0.01073
3865.35	0.010822
3867.21	0.010894
3869.07	0.010945
3870.94	0.010976
3872.8	0.010951
3874.67	0.010926
3876.53	0.010936
3878.39	0.010953
3880.26	0.011029
3882.12	0.011129
3883.98	0.011176
3885.85	0.011179
3887.71	0.011157
3889.57	0.011126
3891.44	0.011143
3893.3	0.011193
3895.17	0.011196
3897.03	0.011212
3898.89	0.011277
3900.76	0.011332
3902.62	0.011364
3904.48	0.011388
3906.35	0.011389
3908.21	0.011409
3910.08	0.011433
3911.94	0.011418
3913.8	0.011458
3915.67	0.011503
3917.53	0.011509
3919.39	0.011568
3921.26	0.011638
3923.12	0.011677
3924.99	0.011675
3926.85	0.011617
3928.71	0.011586
3930.58	0.011611
3932.44	0.011657
3934.3	0.011731
3936.17	0.011788
3938.03	0.011797
3939.9	0.011774
3941.76	0.011744
3943.62	0.011691
3945.49	0.011606
3947.35	0.011575
3949.21	0.011611
3951.08	0.011654
3952.94	0.011667
3954.8	0.011636
3956.67	0.011622
3958.53	0.011667
3960.4	0.011693
3962.26	0.011672
3964.12	0.011687
3965.99	0.011728
3967.85	0.011771
3969.71	0.011793
3971.58	0.011783
3973.44	0.011779
3975.31	0.011778
3977.17	0.011765
3979.03	0.011743
3980.9	0.011702
3982.76	0.011666
3984.62	0.011646
3986.49	0.011651
3988.35	0.011668
3990.22	0.011687
3992.08	0.011708
3993.94	0.011696
3995.81	0.011647
3997.67	0.011607
3999.53	0.011598

## Sheet: CaEC
XLabel	Wavenumber
YLabel	Absorbance
FileType	Absorbance
DisplayDirection	20300
PeakDirection	20310
799.534	0.135769
801.398	0.136011
803.262	0.136418
805.125	0.13711
806.989	0.138087
808.853	0.138947
810.716	0.139168
812.58	0.138746
814.444	0.138082
816.308	0.137438
818.171	0.136852
820.035	0.136306
821.899	0.135824
823.762	0.135421
825.626	0.135107
827.49	0.134873
829.354	0.134707
831.217	0.134574
833.081	0.134464
834.945	0.134419
836.808	0.134405
838.672	0.134388
840.536	0.134403
842.4	0.134435
844.263	0.134492
846.127	0.134659
847.991	0.134897
849.854	0.135089
851.718	0.135098
853.582	0.134914
855.446	0.134953
857.309	0.13573
859.173	0.137204
861.037	0.138929
862.9	0.140591
864.764	0.142101
866.628	0.143488
868.492	0.144825
870.355	0.146181
872.219	0.147609
874.083	0.149076
875.946	0.150468
877.81	0.151701
879.674	0.152679
881.538	0.153284
883.401	0.153552
885.265	0.153587
887.129	0.153412
888.992	0.153063
890.856	0.15259
892.72	0.152022
894.584	0.151309
896.447	0.150393
898.311	0.149338
900.175	0.148207
902.038	0.146996
903.902	0.145698
905.766	0.14437
907.63	0.143103
909.493	0.141958
911.357	0.140966
913.221	0.140091
915.084	0.139193
916.948	0.138168
918.812	0.136988
920.676	0.135698
922.539	0.134414
924.403	0.133215
926.267	0.132179
928.13	0.131432
929.994	0.130982
931.858	0.130746
933.722	0.13064
935.585	0.130604
937.449	0.130576
939.313	0.130524
941.176	0.130504
943.04	0.130596
944.904	0.130773
946.768	0.130956
948.631	0.131113
950.495	0.131265
952.359	0.1314
954.222	0.131467
956.086	0.131455
957.95	0.131384
959.814	0.131273
961.677	0.131181
963.541	0.131149
965.405	0.13117
967.268	0.131231
969.132	0.131327
970.996	0.13151
972.86	0.131806
974.723	0.132164
976.587	0.132558
978.451	0.133004
980.315	0.133543
982.178	0.13419
984.042	0.13493
985.906	0.135739
987.769	0.136621
989.633	0.137579
991.497	0.138583
993.361	0.139641
995.224	0.140791
997.088	0.142045
998.952	0.143438
1000.82	0.145012
1002.68	0.146778
1004.54	0.148732
1006.41	0.150846
1008.27	0.152975
1010.13	0.154899
1012	0.156532
1013.86	0.157956
1015.73	0.159283
1017.59	0.160575
1019.45	0.161858
1021.32	0.163172
1023.18	0.164546
1025.04	0.165951
1026.91	0.167342
1028.77	0.1687
1030.63	0.17
1032.5	0.171232
1034.36	0.172384
1036.23	0.173412
1038.09	0.174298
1039.95	0.17506
1041.82	0.175686
1043.68	0.176172
1045.54	0.176527
1047.41	0.176738
1049.27	0.176819
1051.14	0.17679
1053	0.176681
1054.86	0.176611
1056.73	0.176756
1058.59	0.177175
1060.45	0.177799
1062.32	0.178558
1064.18	0.179399
1066.05	0.18025
1067.91	0.18099
1069.77	0.181542
1071.64	0.18194
1073.5	0.182216
1075.36	0.18234
1077.23	0.18233
1079.09	0.182253
1080.96	0.182182
1082.82	0.182197
1084.68	0.182382
1086.55	0.182724
1088.41	0.183103
1090.27	0.183381
1092.14	0.183507
1094	0.183511
1095.86	0.183411
1097.73	0.183201
1099.59	0.182909
1101.46	0.182581
1103.32	0.182255
1105.18	0.181953
1107.05	0.181678
1108.91	0.181401
1110.77	0.181095
1112.64	0.180792
1114.5	0.180587
1116.37	0.180541
1118.23	0.180625
1120.09	0.18085
1121.96	0.181268
1123.82	0.181867
1125.68	0.182601
1127.55	0.18343
1129.41	0.184303
1131.28	0.185179
1133.14	0.186074
1135	0.18711
1136.87	0.18841
1138.73	0.189977
1140.59	0.191759
1142.46	0.193719
1144.32	0.195853
1146.19	0.198141
1148.05	0.200548
1149.91	0.203046
1151.78	0.205627
1153.64	0.208285
1155.5	0.210983
1157.37	0.213687
1159.23	0.216375
1161.09	0.219045
1162.96	0.221701
1164.82	0.22433
1166.69	0.226918
1168.55	0.229465
1170.41	0.232006
1172.28	0.234545
1174.14	0.237046
1176	0.239487
1177.87	0.241856
1179.73	0.244137
1181.6	0.246303
1183.46	0.248327
1185.32	0.250204
1187.19	0.25195
1189.05	0.253577
1190.91	0.255103
1192.78	0.256552
1194.64	0.25793
1196.51	0.25923
1198.37	0.260433
1200.23	0.261528
1202.1	0.262536
1203.96	0.263444
1205.82	0.264225
1207.69	0.264848
1209.55	0.265279
1211.42	0.265528
1213.28	0.265602
1215.14	0.265485
1217.01	0.265158
1218.87	0.264596
1220.73	0.263807
1222.6	0.262798
1224.46	0.261549
1226.32	0.260053
1228.19	0.258319
1230.05	0.256362
1231.92	0.254206
1233.78	0.251851
1235.64	0.249303
1237.51	0.246582
1239.37	0.243678
1241.23	0.240595
1243.1	0.237371
1244.96	0.234065
1246.83	0.230716
1248.69	0.227347
1250.55	0.223979
1252.42	0.220619
1254.28	0.217271
1256.14	0.213931
1258.01	0.210583
1259.87	0.207228
1261.74	0.203886
1263.6	0.200582
1265.46	0.197362
1267.33	0.194257
1269.19	0.1913
1271.05	0.188538
1272.92	0.186018
1274.78	0.183788
1276.65	0.181878
1278.51	0.180285
1280.37	0.178966
1282.24	0.177858
1284.1	0.17689
1285.96	0.176015
1287.83	0.175228
1289.69	0.174532
1291.56	0.173889
1293.42	0.173279
1295.28	0.172726
1297.15	0.172258
1299.01	0.171898
1300.87	0.171687
1302.74	0.171665
1304.6	0.171827
1306.46	0.172135
1308.33	0.172557
1310.19	0.173035
1312.06	0.173516
1313.92	0.173989
1315.78	0.174492
1317.65	0.175014
1319.51	0.175417
1321.37	0.175653
1323.24	0.175745
1325.1	0.175708
1326.97	0.175568
1328.83	0.175345
1330.69	0.175081
1332.56	0.174817
1334.42	0.174519
1336.28	0.174141
1338.15	0.173779
1340.01	0.173532
1341.88	0.173256
1343.74	0.172871
1345.6	0.172467
1347.47	0.17203
1349.33	0.171565
1351.19	0.171217
1353.06	0.170977
1354.92	0.17078
1356.79	0.170706
1358.65	0.170774
1360.51	0.17091
1362.38	0.171075
1364.24	0.171367
1366.1	0.171768
1367.97	0.172084
1369.83	0.172328
1371.69	0.172632
1373.56	0.17297
1375.42	0.17335
1377.29	0.173782
1379.15	0.174146
1381.01	0.174585
1382.88	0.175184
1384.74	0.175707
1386.6	0.176039
1388.47	0.176324
1390.33	0.176561
1392.2	0.176604
1394.06	0.176555
1395.92	0.176653
1397.79	0.176653
1399.65	0.176422
1401.51	0.176199
1403.38	0.17593
1405.24	0.175648
1407.11	0.175535
1408.97	0.175448
1410.83	0.175145
1412.7	0.174911
1414.56	0.174991
1416.42	0.17496
1418.29	0.174693
1420.15	0.174331
1422.02	0.173922
1423.88	0.17357
1425.74	0.173428
1427.61	0.173227
1429.47	0.172813
1431.33	0.172344
1433.2	0.172108
1435.06	0.172237
1436.92	0.172126
1438.79	0.171785
1440.65	0.171386
1442.52	0.170756
1444.38	0.169795
1446.24	0.168634
1448.11	0.167295
1449.97	0.165933
1451.83	0.164364
1453.7	0.162416
1455.56	0.160201
1457.43	0.157915
1459.29	0.155447
1461.15	0.152725
1463.02	0.150184
1464.88	0.147969
1466.74	0.146127
1468.61	0.144416
1470.47	0.142459
1472.34	0.140426
1474.2	0.138802
1476.06	0.137565
1477.93	0.136389
1479.79	0.134904
1481.65	0.133118
1483.52	0.132394
1485.38	0.133024
1487.25	0.133548
1489.11	0.13401
1490.97	0.134824
1492.84	0.136162
1494.7	0.13794
1496.56	0.13989
1498.43	0.142424
1500.29	0.145538
1502.15	0.1489
1504.02	0.152596
1505.88	0.156444
1507.75	0.160386
1509.61	0.164626
1511.47	0.169006
1513.34	0.172887
1515.2	0.176704
1517.06	0.181339
1518.93	0.186378
1520.79	0.190832
1522.66	0.194789
1524.52	0.198526
1526.38	0.202326
1528.25	0.205985
1530.11	0.208705
1531.97	0.210243
1533.84	0.211864
1535.7	0.214034
1537.57	0.21607
1539.43	0.2171
1541.29	0.217503
1543.16	0.217463
1545.02	0.216801
1546.88	0.215696
1548.75	0.214201
1550.61	0.212199
1552.48	0.210186
1554.34	0.208317
1556.2	0.205968
1558.07	0.203215
1559.93	0.200669
1561.79	0.198133
1563.66	0.195004
1565.52	0.191529
1567.38	0.188418
1569.25	0.185696
1571.11	0.183454
1572.98	0.181561
1574.84	0.179989
1576.7	0.178863
1578.57	0.17826
1580.43	0.178103
1582.29	0.17778
1584.16	0.177828
1586.02	0.179021
1587.89	0.180839
1589.75	0.183091
1591.61	0.185775
1593.48	0.189083
1595.34	0.193102
1597.2	0.197367
1599.07	0.201772
1600.93	0.206371
1602.8	0.211255
1604.66	0.216327
1606.52	0.221363
1608.39	0.226173
1610.25	0.23087
1612.11	0.235732
1613.98	0.240594
1615.84	0.244937
1617.71	0.248827
1619.57	0.252294
1621.43	0.255519
1623.3	0.25875
1625.16	0.261607
1627.02	0.263762
1628.89	0.265771
1630.75	0.267909
1632.62	0.269145
1634.48	0.26961
1636.34	0.269621
1638.21	0.269185
1640.07	0.267948
1641.93	0.26585
1643.8	0.263421
1645.66	0.260626
1647.52	0.257267
1649.39	0.253442
1651.25	0.249345
1653.12	0.245066
1654.98	0.240577
1656.84	0.235895
1658.71	0.230822
1660.57	0.225736
1662.43	0.221099
1664.3	0.216429
1666.16	0.211842
1668.03	0.207234
1669.89	0.202299
1671.75	0.197527
1673.62	0.193348
1675.48	0.18912
1677.34	0.184752
1679.21	0.181062
1681.07	0.177838
1682.94	0.175123
1684.8	0.172816
1686.66	0.170863
1688.53	0.169531
1690.39	0.16877
1692.25	0.168497
1694.12	0.168893
1695.98	0.169826
1697.85	0.17071
1699.71	0.171596
1701.57	0.172668
1703.44	0.173723
1705.3	0.174662
1707.16	0.175221
1709.03	0.175478
1710.89	0.17592
1712.75	0.176064
1714.62	0.175878
1716.48	0.175599
1718.35	0.174963
1720.21	0.173854
1722.07	0.172382
1723.94	0.170353
1725.8	0.167977
1727.66	0.165351
1729.53	0.162176
1731.39	0.158492
1733.26	0.154469
1735.12	0.15006
1736.98	0.145233
1738.85	0.139921
1740.71	0.134004
1742.57	0.127799
1744.44	0.121746
1746.3	0.115811
1748.17	0.110034
1750.03	0.104501
1751.89	0.099103
1753.76	0.093865
1755.62	0.08881
1757.48	0.083842
1759.35	0.079204
1761.21	0.074916
1763.08	0.07081
1764.94	0.066951
1766.8	0.063347
1768.67	0.060045
1770.53	0.05702
1772.39	0.054219
1774.26	0.05168
1776.12	0.049436
1777.98	0.047495
1779.85	0.045777
1781.71	0.0443
1783.58	0.043074
1785.44	0.042014
1787.3	0.041123
1789.17	0.0404
1791.03	0.039812
1792.89	0.03933
1794.76	0.038905
1796.62	0.038487
1798.49	0.038149
1800.35	0.037879
1802.21	0.037664
1804.08	0.037474
1805.94	0.037331
1807.8	0.037235
1809.67	0.037146
1811.53	0.037078
1813.4	0.037034
1815.26	0.036936
1817.12	0.036792
1818.99	0.036655
1820.85	0.03656
1822.71	0.036506
1824.58	0.036412
1826.44	0.036296
1828.31	0.036193
1830.17	0.036065
1832.03	0.03594
1833.9	0.035873
1835.76	0.035818
1837.62	0.035725
1839.49	0.035629
1841.35	0.03555
1843.21	0.035505
1845.08	0.035486
1846.94	0.03548
1848.81	0.035435
1850.67	0.035369
1852.53	0.035318
1854.4	0.03526
1856.26	0.035173
1858.12	0.035099
1859.99	0.035083
1861.85	0.035114
1863.72	0.035135
1865.58	0.035108
1867.44	0.03502
1869.31	0.034904
1871.17	0.034849
1873.03	0.034871
1874.9	0.034874
1876.76	0.034865
1878.63	0.034837
1880.49	0.03476
1882.35	0.034689
1884.22	0.034634
1886.08	0.034575
1887.94	0.034538
1889.81	0.034493
1891.67	0.034393
1893.54	0.034304
1895.4	0.03429
1897.26	0.03423
1899.13	0.034115
1900.99	0.034014
1902.85	0.033923
1904.72	0.033833
1906.58	0.033742
1908.44	0.033618
1910.31	0.033442
1912.17	0.033322
1914.04	0.033238
1915.9	0.033074
1917.76	0.03287
1919.63	0.032649
1921.49	0.032451
1923.35	0.03229
1925.22	0.032183
1927.08	0.032062
1928.95	0.031859
1930.81	0.031623
1932.67	0.031438
1934.54	0.031251
1936.4	0.030981
1938.26	0.030737
1940.13	0.030485
1941.99	0.030197
1943.86	0.029973
1945.72	0.029712
1947.58	0.029423
1949.45	0.029085
1951.31	0.02872
1953.17	0.028388
1955.04	0.028114
1956.9	0.027902
1958.77	0.02767
1960.63	0.027441
1962.49	0.027309
1964.36	0.027225
1966.22	0.027094
1968.08	0.026967
1969.95	0.026847
1971.81	0.026674
1973.68	0.026592
1975.54	0.026624
1977.4	0.026619
1979.27	0.026474
1981.13	0.026253
1982.99	0.02606
1984.86	0.026012
1986.72	0.025908
1988.58	0.025575
1990.45	0.025264
1992.31	0.025132
1994.18	0.025077
1996.04	0.025155
1997.9	0.025351
1999.77	0.025413
2001.63	0.025214
2003.49	0.02503
2005.36	0.024883
2007.22	0.024614
2009.09	0.024382
2010.95	0.024233
2012.81	0.024112
2014.68	0.024046
2016.54	0.023925
2018.4	0.023771
2020.27	0.023557
2022.13	0.023371
2024	0.023332
2025.86	0.023432
2027.72	0.023591
2029.59	0.023773
2031.45	0.023792
2033.31	0.023816
2035.18	0.02409
2037.04	0.024368
2038.91	0.024534
2040.77	0.02471
2042.63	0.024799
2044.5	0.024686
2046.36	0.0246
2048.22	0.024763
2050.09	0.024979
2051.95	0.025219
2053.81	0.025562
2055.68	0.025822
2057.54	0.025949
2059.41	0.026108
2061.27	0.026232
2063.13	0.02637
2065	0.026561
2066.86	0.026765
2068.72	0.026843
2070.59	0.02687
2072.45	0.026925
2074.32	0.026944
2076.18	0.026881
2078.04	0.026803
2079.91	0.026856
2081.77	0.026967
2083.63	0.027005
2085.5	0.027025
2087.36	0.026978
2089.23	0.026966
2091.09	0.027
2092.95	0.027019
2094.82	0.027054
2096.68	0.02713
2098.54	0.02715
2100.41	0.027108
2102.27	0.027061
2104.14	0.02706
2106	0.026976
2107.86	0.026791
2109.73	0.026546
2111.59	0.026328
2113.45	0.026127
2115.32	0.025997
2117.18	0.025822
2119.04	0.025602
2120.91	0.025417
2122.77	0.025293
2124.64	0.025148
2126.5	0.024945
2128.36	0.024606
2130.23	0.024324
2132.09	0.024067
2133.95	0.023748
2135.82	0.023403
2137.68	0.023178
2139.55	0.023035
2141.41	0.022791
2143.27	0.022378
2145.14	0.021957
2147	0.021626
2148.86	0.0214
2150.73	0.021265
2152.59	0.021278
2154.46	0.021364
2156.32	0.021419
2158.18	0.021361
2160.05	0.021356
2161.91	0.021393
2163.77	0.021456
2165.64	0.021455
2167.5	0.021429
2169.37	0.02147
2171.23	0.021569
2173.09	0.021669
2174.96	0.021898
2176.82	0.022198
2178.68	0.022493
2180.55	0.022736
2182.41	0.022945
2184.27	0.023149
2186.14	0.023341
2188	0.023605
2189.87	0.023998
2191.73	0.024342
2193.59	0.024674
2195.46	0.025056
2197.32	0.02532
2199.18	0.025392
2201.05	0.025457
2202.91	0.025656
2204.78	0.025937
2206.64	0.02608
2208.5	0.026168
2210.37	0.026291
2212.23	0.026439
2214.09	0.026674
2215.96	0.026932
2217.82	0.027149
2219.69	0.02735
2221.55	0.027506
2223.41	0.027586
2225.28	0.027667
2227.14	0.027852
2229	0.028081
2230.87	0.028328
2232.73	0.028561
2234.6	0.028756
2236.46	0.028904
2238.32	0.029095
2240.19	0.029272
2242.05	0.029361
2243.91	0.029459
2245.78	0.029683
2247.64	0.029926
2249.5	0.030156
2251.37	0.030389
2253.23	0.030656
2255.1	0.030913
2256.96	0.031162
2258.82	0.031464
2260.69	0.031717
2262.55	0.031935
2264.41	0.032235
2266.28	0.032563
2268.14	0.032851
2270.01	0.033081
2271.87	0.033323
2273.73	0.033591
2275.6	0.033878
2277.46	0.034105
2279.32	0.034317
2281.19	0.034551
2283.05	0.034796
2284.92	0.035072
2286.78	0.035385
2288.64	0.035694
2290.51	0.035996
2292.37	0.036271
2294.23	0.036539
2296.1	0.036808
2297.96	0.037099
2299.83	0.037412
2301.69	0.037716
2303.55	0.037998
2305.42	0.038253
2307.28	0.038474
2309.14	0.038684
2311.01	0.038875
2312.87	0.039024
2314.74	0.039187
2316.6	0.03942
2318.46	0.039647
2320.33	0.039847
2322.19	0.040012
2324.05	0.040156
2325.92	0.040319
2327.78	0.040505
2329.64	0.04069
2331.51	0.040859
2333.37	0.040982
2335.24	0.041126
2337.1	0.041309
2338.96	0.041466
2340.83	0.041614
2342.69	0.041741
2344.55	0.041856
2346.42	0.041986
2348.28	0.042147
2350.15	0.042337
2352.01	0.042518
2353.87	0.042698
2355.74	0.042884
2357.6	0.043063
2359.46	0.043239
2361.33	0.043401
2363.19	0.04357
2365.06	0.04378
2366.92	0.043991
2368.78	0.044213
2370.65	0.044429
2372.51	0.044629
2374.37	0.044838
2376.24	0.045064
2378.1	0.045305
2379.97	0.045576
2381.83	0.045825
2383.69	0.046043
2385.56	0.046298
2387.42	0.046543
2389.28	0.046774
2391.15	0.046998
2393.01	0.047217
2394.87	0.047471
2396.74	0.047711
2398.6	0.047954
2400.47	0.048229
2402.33	0.048516
2404.19	0.048799
2406.06	0.049098
2407.92	0.049405
2409.78	0.049712
2411.65	0.050004
2413.51	0.050269
2415.38	0.05051
2417.24	0.050793
2419.1	0.051096
2420.97	0.051386
2422.83	0.051693
2424.69	0.05199
2426.56	0.05222
2428.42	0.052448
2430.29	0.052703
2432.15	0.052927
2434.01	0.053195
2435.88	0.053536
2437.74	0.053863
2439.6	0.054162
2441.47	0.05441
2443.33	0.054641
2445.2	0.054883
2447.06	0.0551
2448.92	0.055309
2450.79	0.055559
2452.65	0.05581
2454.51	0.056018
2456.38	0.056192
2458.24	0.056361
2460.1	0.056583
2461.97	0.056829
2463.83	0.057035
2465.7	0.057243
2467.56	0.05747
2469.42	0.057655
2471.29	0.057839
2473.15	0.058116
2475.01	0.058395
2476.88	0.058646
2478.74	0.058905
2480.61	0.059118
2482.47	0.059323
2484.33	0.059544
2486.2	0.059765
2488.06	0.059984
2489.92	0.060235
2491.79	0.060495
2493.65	0.060743
2495.52	0.061013
2497.38	0.061279
2499.24	0.06157
2501.11	0.0619
2502.97	0.06222
2504.83	0.062539
2506.7	0.06284
2508.56	0.063109
2510.43	0.063383
2512.29	0.06365
2514.15	0.063888
2516.02	0.064103
2517.88	0.064294
2519.74	0.064439
2521.61	0.064584
2523.47	0.064739
2525.33	0.064868
2527.2	0.065001
2529.06	0.065114
2530.93	0.065251
2532.79	0.065374
2534.65	0.065471
2536.52	0.065551
2538.38	0.065622
2540.24	0.065701
2542.11	0.065749
2543.97	0.065761
2545.84	0.065745
2547.7	0.065743
2549.56	0.065758
2551.43	0.065729
2553.29	0.0657
2555.15	0.065721
2557.02	0.065742
2558.88	0.065759
2560.75	0.065801
2562.61	0.065896
2564.47	0.066014
2566.34	0.066113
2568.2	0.066181
2570.06	0.066269
2571.93	0.06639
2573.79	0.066494
2575.66	0.0666
2577.52	0.066699
2579.38	0.066816
2581.25	0.066962
2583.11	0.067117
2584.97	0.067245
2586.84	0.067357
2588.7	0.067473
2590.56	0.067608
2592.43	0.067767
2594.29	0.06793
2596.16	0.068096
2598.02	0.068253
2599.88	0.068373
2601.75	0.068529
2603.61	0.068711
2605.47	0.06885
2607.34	0.068949
2609.2	0.06901
2611.07	0.06905
2612.93	0.069079
2614.79	0.069119
2616.66	0.069134
2618.52	0.069133
2620.38	0.069145
2622.25	0.069118
2624.11	0.069055
2625.98	0.069015
2627.84	0.068963
2629.7	0.068853
2631.57	0.068734
2633.43	0.068639
2635.29	0.068544
2637.16	0.068433
2639.02	0.068295
2640.89	0.068112
2642.75	0.067897
2644.61	0.06772
2646.48	0.067581
2648.34	0.067375
2650.2	0.067142
2652.07	0.066943
2653.93	0.06675
2655.79	0.066577
2657.66	0.066425
2659.52	0.0663
2661.39	0.066188
2663.25	0.066078
2665.11	0.065978
2666.98	0.065896
2668.84	0.065829
2670.7	0.065754
2672.57	0.065668
2674.43	0.065603
2676.3	0.06559
2678.16	0.0656
2680.02	0.065606
2681.89	0.065622
2683.75	0.065639
2685.61	0.065648
2687.48	0.065676
2689.34	0.065727
2691.21	0.065785
2693.07	0.06588
2694.93	0.06601
2696.8	0.066135
2698.66	0.066255
2700.52	0.066371
2702.39	0.066475
2704.25	0.066594
2706.12	0.066743
2707.98	0.066886
2709.84	0.067
2711.71	0.067115
2713.57	0.067233
2715.43	0.067355
2717.3	0.067513
2719.16	0.067669
2721.03	0.067795
2722.89	0.06789
2724.75	0.067973
2726.62	0.068078
2728.48	0.068203
2730.34	0.068335
2732.21	0.068454
2734.07	0.068569
2735.93	0.068698
2737.8	0.068832
2739.66	0.068933
2741.53	0.069011
2743.39	0.069117
2745.25	0.069231
2747.12	0.069353
2748.98	0.069487
2750.84	0.069616
2752.71	0.069743
2754.57	0.069918
2756.44	0.070097
2758.3	0.070261
2760.16	0.070432
2762.03	0.070619
2763.89	0.070795
2765.75	0.070974
2767.62	0.071194
2769.48	0.071458
2771.35	0.07175
2773.21	0.072039
2775.07	0.072323
2776.94	0.072602
2778.8	0.072918
2780.66	0.073269
2782.53	0.073606
2784.39	0.073933
2786.26	0.074281
2788.12	0.074667
2789.98	0.075055
2791.85	0.075457
2793.71	0.075864
2795.57	0.07627
2797.44	0.076682
2799.3	0.077094
2801.16	0.077476
2803.03	0.077883
2804.89	0.078327
2806.76	0.078786
2808.62	0.079266
2810.48	0.079756
2812.35	0.080263
2814.21	0.080799
2816.07	0.081365
2817.94	0.08199
2819.8	0.082665
2821.67	0.083383
2823.53	0.084176
2825.39	0.085027
2827.26	0.085908
2829.12	0.086825
2830.98	0.087733
2832.85	0.088577
2834.71	0.089372
2836.58	0.090121
2838.44	0.090808
2840.3	0.091471
2842.17	0.092116
2844.03	0.092738
2845.89	0.093362
2847.76	0.093995
2849.62	0.094614
2851.49	0.09522
2853.35	0.095809
2855.21	0.09637
2857.08	0.096943
2858.94	0.09751
2860.8	0.09802
2862.67	0.098487
2864.53	0.098909
2866.39	0.099277
2868.26	0.0996
2870.12	0.099872
2871.99	0.100104
2873.85	0.100303
2875.71	0.100504
2877.58	0.10078
2879.44	0.101124
2881.3	0.101514
2883.17	0.101978
2885.03	0.102534
2886.9	0.103164
2888.76	0.103884
2890.62	0.104707
2892.49	0.105593
2894.35	0.106536
2896.21	0.107549
2898.08	0.108574
2899.94	0.109596
2901.81	0.110596
2903.67	0.111539
2905.53	0.112437
2907.4	0.113305
2909.26	0.114094
2911.12	0.114769
2912.99	0.115331
2914.85	0.115794
2916.72	0.116192
2918.58	0.116511
2920.44	0.116736
2922.31	0.116871
2924.17	0.116902
2926.03	0.116889
2927.9	0.116827
2929.76	0.116672
2931.62	0.116458
2933.49	0.116203
2935.35	0.11585
2937.22	0.115368
2939.08	0.114762
2940.94	0.114051
2942.81	0.113243
2944.67	0.112364
2946.53	0.111431
2948.4	0.110482
2950.26	0.109529
2952.13	0.108571
2953.99	0.10766
2955.85	0.106797
2957.72	0.105992
2959.58	0.105257
2961.44	0.104574
2963.31	0.103903
2965.17	0.103234
2967.04	0.102622
2968.9	0.102073
2970.76	0.101554
2972.63	0.101
2974.49	0.100413
2976.35	0.099841
2978.22	0.09926
2980.08	0.098652
2981.95	0.098047
2983.81	0.097439
2985.67	0.096838
2987.54	0.09627
2989.4	0.095729
2991.26	0.095221
2993.13	0.094785
2994.99	0.094384
2996.85	0.093986
2998.72	0.093612
3000.58	0.093228
3002.45	0.092868
3004.31	0.092563
3006.17	0.092292
3008.04	0.092013
3009.9	0.091753
3011.76	0.091542
3013.63	0.091352
3015.49	0.09118
3017.36	0.091029
3019.22	0.090942
3021.08	0.090942
3022.95	0.09101
3024.81	0.091099
3026.67	0.091185
3028.54	0.0913
3030.4	0.091473
3032.27	0.091683
3034.13	0.091899
3035.99	0.09215
3037.86	0.09241
3039.72	0.09264
3041.58	0.092868
3043.45	0.093134
3045.31	0.093432
3047.18	0.093717
3049.04	0.093984
3050.9	0.094214
3052.77	0.094436
3054.63	0.094685
3056.49	0.094933
3058.36	0.095169
3060.22	0.095399
3062.09	0.095595
3063.95	0.095758
3065.81	0.095886
3067.68	0.095976
3069.54	0.096014
3071.4	0.096029
3073.27	0.096022
3075.13	0.095963
3076.99	0.095847
3078.86	0.09573
3080.72	0.095591
3082.59	0.095392
3084.45	0.095195
3086.31	0.095
3088.18	0.094785
3090.04	0.094533
3091.9	0.094216
3093.77	0.093919
3095.63	0.093647
3097.5	0.093376
3099.36	0.093147
3101.22	0.092953
3103.09	0.092758
3104.95	0.092541
3106.81	0.092289
3108.68	0.092064
3110.54	0.091906
3112.41	0.09175
3114.27	0.091609
3116.13	0.091483
3118	0.091379
3119.86	0.091355
3121.72	0.091402
3123.59	0.091494
3125.45	0.091609
3127.32	0.091714
3129.18	0.091842
3131.04	0.092011
3132.91	0.092227
3134.77	0.092484
3136.63	0.09278
3138.5	0.093158
3140.36	0.093573
3142.22	0.09399
3144.09	0.094439
3145.95	0.094873
3147.82	0.095284
3149.68	0.095765
3151.54	0.096307
3153.41	0.096888
3155.27	0.097493
3157.13	0.098045
3159	0.09858
3160.86	0.099149
3162.73	0.099774
3164.59	0.100429
3166.45	0.101058
3168.32	0.101689
3170.18	0.102324
3172.04	0.102952
3173.91	0.103619
3175.77	0.104304
3177.64	0.104937
3179.5	0.105568
3181.36	0.106189
3183.23	0.106814
3185.09	0.107419
3186.95	0.107981
3188.82	0.10854
3190.68	0.109065
3192.55	0.109595
3194.41	0.110171
3196.27	0.110714
3198.14	0.111228
3200	0.111739
3201.86	0.112239
3203.73	0.112778
3205.59	0.113336
3207.45	0.11385
3209.32	0.114351
3211.18	0.114862
3213.05	0.115374
3214.91	0.115827
3216.77	0.116272
3218.64	0.116728
3220.5	0.117202
3222.36	0.117666
3224.23	0.118119
3226.09	0.118558
3227.96	0.119038
3229.82	0.119513
3231.68	0.119983
3233.55	0.12051
3235.41	0.121069
3237.27	0.121634
3239.14	0.122165
3241	0.122679
3242.87	0.123225
3244.73	0.123757
3246.59	0.124294
3248.46	0.124875
3250.32	0.12551
3252.18	0.126168
3254.05	0.126814
3255.91	0.127444
3257.78	0.128079
3259.64	0.12871
3261.5	0.129402
3263.37	0.130133
3265.23	0.130834
3267.09	0.131526
3268.96	0.13223
3270.82	0.132923
3272.68	0.133585
3274.55	0.134189
3276.41	0.134805
3278.28	0.13543
3280.14	0.135959
3282	0.136391
3283.87	0.136815
3285.73	0.137236
3287.59	0.137595
3289.46	0.13788
3291.32	0.138132
3293.19	0.1383
3295.05	0.138371
3296.91	0.13833
3298.78	0.138232
3300.64	0.138102
3302.5	0.137903
3304.37	0.137625
3306.23	0.137327
3308.1	0.136964
3309.96	0.136422
3311.82	0.1358
3313.69	0.135156
3315.55	0.134489
3317.41	0.133829
3319.28	0.13309
3321.14	0.132283
3323.01	0.131425
3324.87	0.130503
3326.73	0.129562
3328.6	0.128636
3330.46	0.12765
3332.32	0.126558
3334.19	0.125465
3336.05	0.124405
3337.91	0.123342
3339.78	0.122298
3341.64	0.121229
3343.51	0.120153
3345.37	0.119063
3347.23	0.11796
3349.1	0.116828
3350.96	0.115716
3352.82	0.114628
3354.69	0.113522
3356.55	0.112513
3358.42	0.111553
3360.28	0.110533
3362.14	0.109515
3364.01	0.108522
3365.87	0.10757
3367.73	0.106664
3369.6	0.105764
3371.46	0.104911
3373.33	0.104121
3375.19	0.103329
3377.05	0.102587
3378.92	0.101941
3380.78	0.101288
3382.64	0.100609
3384.51	0.099988
3386.37	0.099364
3388.24	0.098762
3390.1	0.098189
3391.96	0.097659
3393.83	0.097227
3395.69	0.096863
3397.55	0.096435
3399.42	0.095927
3401.28	0.095457
3403.15	0.094992
3405.01	0.094523
3406.87	0.094104
3408.74	0.093691
3410.6	0.093264
3412.46	0.09287
3414.33	0.092551
3416.19	0.092284
3418.05	0.091968
3419.92	0.091667
3421.78	0.091441
3423.65	0.091175
3425.51	0.090912
3427.37	0.090694
3429.24	0.090494
3431.1	0.090372
3432.96	0.090377
3434.83	0.09044
3436.69	0.090497
3438.56	0.090586
3440.42	0.090588
3442.28	0.090458
3444.15	0.090274
3446.01	0.090033
3447.87	0.089689
3449.74	0.089315
3451.6	0.088905
3453.47	0.088428
3455.33	0.087881
3457.19	0.087296
3459.06	0.086692
3460.92	0.086032
3462.78	0.085329
3464.65	0.084605
3466.51	0.08379
3468.38	0.082906
3470.24	0.082073
3472.1	0.081238
3473.97	0.080392
3475.83	0.079503
3477.69	0.078462
3479.56	0.077318
3481.42	0.076061
3483.28	0.074792
3485.15	0.073535
3487.01	0.072315
3488.88	0.071191
3490.74	0.07013
3492.6	0.069144
3494.47	0.068286
3496.33	0.067483
3498.19	0.066708
3500.06	0.065968
3501.92	0.065294
3503.79	0.06466
3505.65	0.063987
3507.51	0.063275
3509.38	0.062559
3511.24	0.061863
3513.1	0.061165
3514.97	0.060488
3516.83	0.059812
3518.7	0.059127
3520.56	0.058421
3522.42	0.057778
3524.29	0.057192
3526.15	0.056595
3528.01	0.056016
3529.88	0.055456
3531.74	0.054879
3533.61	0.054219
3535.47	0.053547
3537.33	0.052914
3539.2	0.05226
3541.06	0.051601
3542.92	0.050988
3544.79	0.050369
3546.65	0.049723
3548.51	0.049059
3550.38	0.048384
3552.24	0.047741
3554.11	0.047093
3555.97	0.046448
3557.83	0.045882
3559.7	0.045359
3561.56	0.044776
3563.42	0.044168
3565.29	0.043596
3567.15	0.042983
3569.02	0.04227
3570.88	0.041554
3572.74	0.040854
3574.61	0.040182
3576.47	0.039531
3578.33	0.038821
3580.2	0.038134
3582.06	0.037497
3583.93	0.036923
3585.79	0.036391
3587.65	0.035724
3589.52	0.0349
3591.38	0.034114
3593.24	0.033413
3595.11	0.032718
3596.97	0.032053
3598.84	0.031374
3600.7	0.030649
3602.56	0.029916
3604.43	0.029175
3606.29	0.028459
3608.15	0.027763
3610.02	0.027029
3611.88	0.026236
3613.74	0.025524
3615.61	0.02493
3617.47	0.024336
3619.34	0.023706
3621.2	0.023028
3623.06	0.022294
3624.93	0.021585
3626.79	0.02094
3628.65	0.020279
3630.52	0.019501
3632.38	0.018687
3634.25	0.017972
3636.11	0.017392
3637.97	0.016806
3639.84	0.016155
3641.7	0.015504
3643.56	0.014808
3645.43	0.014146
3647.29	0.013597
3649.16	0.013005
3651.02	0.012331
3652.88	0.01167
3654.75	0.011079
3656.61	0.010531
3658.47	0.010031
3660.34	0.009557
3662.2	0.009071
3664.07	0.008543
3665.93	0.008033
3667.79	0.007641
3669.66	0.007296
3671.52	0.006948
3673.38	0.006621
3675.25	0.006308
3677.11	0.006083
3678.97	0.005941
3680.84	0.005798
3682.7	0.005553
3684.57	0.005263
3686.43	0.005048
3688.29	0.004853
3690.16	0.004679
3692.02	0.004536
3693.88	0.004404
3695.75	0.004326
3697.61	0.004247
3699.48	0.004137
3701.34	0.004024
3703.2	0.003976
3705.07	0.003914
3706.93	0.003781
3708.79	0.003658
3710.66	0.003641
3712.52	0.003628
3714.39	0.003502
3716.25	0.003354
3718.11	0.003269
3719.98	0.003149
3721.84	0.003019
3723.7	0.002911
3725.57	0.002764
3727.43	0.0026
3729.3	0.002539
3731.16	0.002536
3733.02	0.00252
3734.89	0.002527
3736.75	0.002541
3738.61	0.002537
3740.48	0.002532
3742.34	0.002532
3744.21	0.00256
3746.07	0.002603
3747.93	0.002668
3749.8	0.002723
3751.66	0.002767
3753.52	0.002847
3755.39	0.002909
3757.25	0.002889
3759.11	0.002903
3760.98	0.003005
3762.84	0.003107
3764.71	0.003138
3766.57	0.003191
3768.43	0.003273
3770.3	0.003311
3772.16	0.003341
3774.02	0.003416
3775.89	0.003484
3777.75	0.003515
3779.62	0.003507
3781.48	0.003469
3783.34	0.003484
3785.21	0.003526
3787.07	0.003523
3788.93	0.003495
3790.8	0.003479
3792.66	0.003457
3794.53	0.003402
3796.39	0.003335
3798.25	0.003298
3800.12	0.003245
3801.98	0.00319
3803.84	0.003187
3805.71	0.003178
3807.57	0.003135
3809.44	0.003108
3811.3	0.003073
3813.16	0.003022
3815.03	0.002992
3816.89	0.002999
3818.75	0.003018
3820.62	0.002998
3822.48	0.002958
3824.34	0.002982
3826.21	0.003064
3828.07	0.003111
3829.94	0.003084
3831.8	0.003019
3833.66	0.002962
3835.53	0.002935
3837.39	0.002966
3839.25	0.003056
3841.12	0.00312
3842.98	0.003142
3844.85	0.003145
3846.71	0.003154
3848.57	0.003187
3850.44	0.003189
3852.3	0.003166
3854.16	0.003138
3856.03	0.003107
3857.89	0.003134
3859.76	0.003178
3861.62	0.003197
3863.48	0.003211
3865.35	0.00326
3867.21	0.003294
3869.07	0.003294
3870.94	0.003288
3872.8	0.003264
3874.67	0.003272
3876.53	0.003327
3878.39	0.003396
3880.26	0.003456
3882.12	0.003487
3883.98	0.003497
3885.85	0.003476
3887.71	0.003467
3889.57	0.00348
3891.44	0.003494
3893.3	0.003533
3895.17	0.003539
3897.03	0.003527
3898.89	0.003554
3900.76	0.003596
3902.62	0.003627
3904.48	0.003648
3906.35	0.003667
3908.21	0.003674
3910.08	0.003684
3911.94	0.003689
3913.8	0.00371
3915.67	0.003762
3917.53	0.003786
3919.39	0.003753
3921.26	0.003741
3923.12	0.00374
3924.99	0.003717
3926.85	0.003726
3928.71	0.003778
3930.58	0.003804
3932.44	0.003816
3934.3	0.003858
3936.17	0.003926
3938.03	0.003999
3939.9	0.004009
3941.76	0.00399
3943.62	0.004002
3945.49	0.004029
3947.35	0.004058
3949.21	0.004076
3951.08	0.004078
3952.94	0.004077
3954.8	0.004087
3956.67	0.004095
3958.53	0.004093
3960.4	0.004102
3962.26	0.004123
3964.12	0.004179
3965.99	0.004263
3967.85	0.004307
3969.71	0.004342
3971.58	0.004379
3973.44	0.004375
3975.31	0.004371
3977.17	0.004382
3979.03	0.004387
3980.9	0.004368
3982.76	0.00433
3984.62	0.004295
3986.49	0.0043
3988.35	0.004324
3990.22	0.004333
3992.08	0.004324
3993.94	0.004318
3995.81	0.004329
3997.67	0.00435
3999.53	0.004372

## Sheet: CoFC
XLabel	Wavenumber
YLabel	Absorbance
FileType	Absorbance
DisplayDirection	20300
PeakDirection	20310
799.534	0.10989
801.398	0.108779
803.262	0.107746
805.125	0.106658
806.989	0.106292
808.853	0.106037
810.716	0.104926
812.58	0.103565
814.444	0.103056
816.308	0.10205
818.171	0.100192
820.035	0.099265
821.899	0.098519
823.762	0.097075
825.626	0.096444
827.49	0.096584
829.354	0.096048
831.217	0.095862
833.081	0.095594
834.945	0.095032
836.808	0.09543
838.672	0.095953
840.536	0.095204
842.4	0.095047
844.263	0.095605
846.127	0.095695
847.991	0.095527
849.854	0.095737
851.718	0.095405
853.582	0.095125
855.446	0.095795
857.309	0.095881
859.173	0.095465
861.037	0.095668
862.9	0.095682
864.764	0.095444
866.628	0.096004
868.492	0.09696
870.355	0.096384
872.219	0.095818
874.083	0.096082
875.946	0.095768
877.81	0.094893
879.674	0.094391
881.538	0.093108
883.401	0.091365
885.265	0.090373
887.129	0.089944
888.992	0.089809
890.856	0.089128
892.72	0.088593
894.584	0.089687
896.447	0.090677
898.311	0.090682
900.175	0.091045
902.038	0.092232
903.902	0.093338
905.766	0.093871
907.63	0.094048
909.493	0.094872
911.357	0.095876
913.221	0.096512
915.084	0.097401
916.948	0.098384
918.812	0.098837
920.676	0.098866
922.539	0.098421
924.403	0.097778
926.267	0.096984
928.13	0.096768
929.994	0.096522
931.858	0.095997
933.722	0.095722
935.585	0.095389
937.449	0.095076
939.313	0.094689
941.176	0.094618
943.04	0.094097
944.904	0.093515
946.768	0.09331
948.631	0.093029
950.495	0.093294
952.359	0.094434
954.222	0.095382
956.086	0.095876
957.95	0.096506
959.814	0.097052
961.677	0.097684
963.541	0.098663
965.405	0.099469
967.268	0.100232
969.132	0.101217
970.996	0.101601
972.86	0.101916
974.723	0.10232
976.587	0.102405
978.451	0.102694
980.315	0.102999
982.178	0.102987
984.042	0.1035
985.906	0.104158
987.769	0.104683
989.633	0.105736
991.497	0.106989
993.361	0.108102
995.224	0.10913
997.088	0.110199
998.952	0.111459
1000.82	0.112882
1002.68	0.114271
1004.54	0.115646
1006.41	0.116822
1008.27	0.118373
1010.13	0.120075
1012	0.121243
1013.86	0.122145
1015.73	0.12317
1017.59	0.124381
1019.45	0.125645
1021.32	0.127145
1023.18	0.128434
1025.04	0.12961
1026.91	0.1307
1028.77	0.130939
1030.63	0.130266
1032.5	0.128691
1034.36	0.127168
1036.23	0.125779
1038.09	0.124426
1039.95	0.123488
1041.82	0.122597
1043.68	0.122128
1045.54	0.122353
1047.41	0.122966
1049.27	0.123659
1051.14	0.124196
1053	0.124925
1054.86	0.125787
1056.73	0.126665
1058.59	0.127454
1060.45	0.128258
1062.32	0.128884
1064.18	0.129479
1066.05	0.13024
1067.91	0.13096
1069.77	0.132053
1071.64	0.133759
1073.5	0.135836
1075.36	0.138072
1077.23	0.14023
1079.09	0.141616
1080.96	0.141757
1082.82	0.140597
1084.68	0.138235
1086.55	0.13541
1088.41	0.132889
1090.27	0.130562
1092.14	0.128921
1094	0.1282
1095.86	0.127935
1097.73	0.127837
1099.59	0.127564
1101.46	0.127059
1103.32	0.126617
1105.18	0.126235
1107.05	0.125761
1108.91	0.125224
1110.77	0.124898
1112.64	0.124741
1114.5	0.124758
1116.37	0.124772
1118.23	0.124567
1120.09	0.124555
1121.96	0.124793
1123.82	0.124938
1125.68	0.125138
1127.55	0.125533
1129.41	0.125987
1131.28	0.126358
1133.14	0.126955
1135	0.127775
1136.87	0.128521
1138.73	0.129309
1140.59	0.130713
1142.46	0.132216
1144.32	0.133682
1146.19	0.135301
1148.05	0.137195
1149.91	0.139407
1151.78	0.141415
1153.64	0.142838
1155.5	0.144371
1157.37	0.145734
1159.23	0.146689
1161.09	0.147046
1162.96	0.146777
1164.82	0.146119
1166.69	0.145326
1168.55	0.144662
1170.41	0.144019
1172.28	0.143465
1174.14	0.14348
1176	0.143865
1177.87	0.144571
1179.73	0.145727
1181.6	0.147343
1183.46	0.148986
1185.32	0.150707
1187.19	0.152803
1189.05	0.154806
1190.91	0.156728
1192.78	0.158778
1194.64	0.160536
1196.51	0.16207
1198.37	0.163134
1200.23	0.163679
1202.1	0.163797
1203.96	0.163687
1205.82	0.1635
1207.69	0.163402
1209.55	0.163756
1211.42	0.164878
1213.28	0.16687
1215.14	0.169621
1217.01	0.172809
1218.87	0.176336
1220.73	0.179806
1222.6	0.183087
1224.46	0.186452
1226.32	0.189599
1228.19	0.192005
1230.05	0.193695
1231.92	0.195036
1233.78	0.196169
1235.64	0.196667
1237.51	0.196832
1239.37	0.196652
1241.23	0.195854
1243.1	0.194879
1244.96	0.19374
1246.83	0.191744
1248.69	0.189701
1250.55	0.188178
1252.42	0.186585
1254.28	0.184674
1256.14	0.18301
1258.01	0.181841
1259.87	0.180987
1261.74	0.180105
1263.6	0.179177
1265.46	0.178473
1267.33	0.177809
1269.19	0.177083
1271.05	0.176713
1272.92	0.176467
1274.78	0.175743
1276.65	0.175127
1278.51	0.174517
1280.37	0.173394
1282.24	0.17212
1284.1	0.170745
1285.96	0.169426
1287.83	0.168559
1289.69	0.167977
1291.56	0.167402
1293.42	0.167631
1295.28	0.168511
1297.15	0.169769
1299.01	0.171225
1300.87	0.172552
1302.74	0.173687
1304.6	0.175052
1306.46	0.176437
1308.33	0.177402
1310.19	0.178177
1312.06	0.179349
1313.92	0.180433
1315.78	0.181032
1317.65	0.181609
1319.51	0.182533
1321.37	0.183052
1323.24	0.183395
1325.1	0.183782
1326.97	0.18413
1328.83	0.184826
1330.69	0.185225
1332.56	0.184485
1334.42	0.183256
1336.28	0.181923
1338.15	0.181342
1340.01	0.181226
1341.88	0.179173
1343.74	0.176635
1345.6	0.175091
1347.47	0.173594
1349.33	0.172777
1351.19	0.172325
1353.06	0.172121
1354.92	0.173115
1356.79	0.174241
1358.65	0.174716
1360.51	0.176706
1362.38	0.181788
1364.24	0.185478
1366.1	0.186388
1367.97	0.189091
1369.83	0.192189
1371.69	0.194794
1373.56	0.200674
1375.42	0.206127
1377.29	0.208312
1379.15	0.211581
1381.01	0.214697
1382.88	0.216222
1384.74	0.217725
1386.6	0.221761
1388.47	0.225308
1390.33	0.223214
1392.2	0.221361
1394.06	0.22294
1395.92	0.224268
1397.79	0.223251
1399.65	0.222202
1401.51	0.218322
1403.38	0.214323
1405.24	0.212907
1407.11	0.209378
1408.97	0.204963
1410.83	0.202296
1412.7	0.199951
1414.56	0.19652
1416.42	0.19449
1418.29	0.198357
1420.15	0.202716
1422.02	0.200688
1423.88	0.202388
1425.74	0.206064
1427.61	0.208115
1429.47	0.213346
1431.33	0.217633
1433.2	0.217861
1435.06	0.220678
1436.92	0.228798
1438.79	0.229386
1440.65	0.225813
1442.52	0.225684
1444.38	0.225469
1446.24	0.225297
1448.11	0.225889
1449.97	0.223726
1451.83	0.218717
1453.7	0.213387
1455.56	0.211092
1457.43	0.213996
1459.29	0.207979
1461.15	0.19883
1463.02	0.194478
1464.88	0.194465
1466.74	0.191461
1468.61	0.185025
1470.47	0.18208
1472.34	0.185675
1474.2	0.188046
1476.06	0.185901
1477.93	0.184559
1479.79	0.184337
1481.65	0.186973
1483.52	0.189037
1485.38	0.191572
1487.25	0.19926
1489.11	0.212321
1490.97	0.222272
1492.84	0.223174
1494.7	0.226675
1496.56	0.241194
1498.43	0.25348
1500.29	0.256823
1502.15	0.256392
1504.02	0.257071
1505.88	0.271147
1507.75	0.294925
1509.61	0.292406
1511.47	0.289084
1513.34	0.288874
1515.2	0.289033
1517.06	0.291227
1518.93	0.29173
1520.79	0.293654
1522.66	0.298292
1524.52	0.295827
1526.38	0.29396
1528.25	0.29155
1530.11	0.286375
1531.97	0.283524
1533.84	0.283377
1535.7	0.278467
1537.57	0.271595
1539.43	0.272525
1541.29	0.276682
1543.16	0.271893
1545.02	0.266225
1546.88	0.260169
1548.75	0.255338
1550.61	0.251598
1552.48	0.246601
1554.34	0.240881
1556.2	0.236368
1558.07	0.238155
1559.93	0.241801
1561.79	0.233176
1563.66	0.226043
1565.52	0.221869
1567.38	0.218595
1569.25	0.217742
1571.11	0.216053
1572.98	0.211822
1574.84	0.211389
1576.7	0.215013
1578.57	0.213342
1580.43	0.210613
1582.29	0.210415
1584.16	0.210846
1586.02	0.211444
1587.89	0.212858
1589.75	0.214264
1591.61	0.215959
1593.48	0.218053
1595.34	0.221647
1597.2	0.225293
1599.07	0.22846
1600.93	0.232416
1602.8	0.237271
1604.66	0.24191
1606.52	0.247376
1608.39	0.253787
1610.25	0.25996
1612.11	0.264566
1613.98	0.268893
1615.84	0.277161
1617.71	0.288036
1619.57	0.289818
1621.43	0.290745
1623.3	0.29672
1625.16	0.300782
1627.02	0.301285
1628.89	0.303011
1630.75	0.301582
1632.62	0.297159
1634.48	0.294488
1636.34	0.295453
1638.21	0.293266
1640.07	0.286784
1641.93	0.279761
1643.8	0.273056
1645.66	0.267034
1647.52	0.262247
1649.39	0.256057
1651.25	0.249027
1653.12	0.243357
1654.98	0.238723
1656.84	0.230706
1658.71	0.222052
1660.57	0.214709
1662.43	0.2073
1664.3	0.199802
1666.16	0.192911
1668.03	0.185566
1669.89	0.178313
1671.75	0.170677
1673.62	0.163512
1675.48	0.155663
1677.34	0.148342
1679.21	0.141366
1681.07	0.133628
1682.94	0.126446
1684.8	0.118388
1686.66	0.111871
1688.53	0.105639
1690.39	0.098052
1692.25	0.090573
1694.12	0.083664
1695.98	0.075522
1697.85	0.067623
1699.71	0.060851
1701.57	0.053744
1703.44	0.050072
1705.3	0.045001
1707.16	0.04027
1709.03	0.036895
1710.89	0.033786
1712.75	0.03136
1714.62	0.030411
1716.48	0.029721
1718.35	0.027939
1720.21	0.026008
1722.07	0.024958
1723.94	0.024281
1725.8	0.023821
1727.66	0.023053
1729.53	0.022565
1731.39	0.022007
1733.26	0.021981
1735.12	0.022051
1736.98	0.021745
1738.85	0.021284
1740.71	0.021148
1742.57	0.020958
1744.44	0.021049
1746.3	0.0212
1748.17	0.021066
1750.03	0.020837
1751.89	0.021199
1753.76	0.021311
1755.62	0.020885
1757.48	0.020469
1759.35	0.020636
1761.21	0.020872
1763.08	0.020923
1764.94	0.020569
1766.8	0.020568
1768.67	0.020949
1770.53	0.021506
1772.39	0.02138
1774.26	0.021139
1776.12	0.021083
1777.98	0.02103
1779.85	0.021006
1781.71	0.02123
1783.58	0.021264
1785.44	0.021165
1787.3	0.020702
1789.17	0.020576
1791.03	0.021253
1792.89	0.021652
1794.76	0.021409
1796.62	0.021587
1798.49	0.021837
1800.35	0.021908
1802.21	0.022041
1804.08	0.022185
1805.94	0.022164
1807.8	0.022008
1809.67	0.021706
1811.53	0.021904
1813.4	0.021861
1815.26	0.021565
1817.12	0.021958
1818.99	0.022346
1820.85	0.022204
1822.71	0.022299
1824.58	0.022849
1826.44	0.023057
1828.31	0.022606
1830.17	0.022495
1832.03	0.021884
1833.9	0.021795
1835.76	0.02262
1837.62	0.023197
1839.49	0.023581
1841.35	0.023779
1843.21	0.023245
1845.08	0.02273
1846.94	0.022839
1848.81	0.023202
1850.67	0.022946
1852.53	0.02286
1854.4	0.023358
1856.26	0.023517
1858.12	0.023319
1859.99	0.02355
1861.85	0.023203
1863.72	0.022811
1865.58	0.022706
1867.44	0.023675
1869.31	0.023824
1871.17	0.023362
1873.03	0.023362
1874.9	0.023032
1876.76	0.022926
1878.63	0.023678
1880.49	0.024364
1882.35	0.024625
1884.22	0.023703
1886.08	0.023184
1887.94	0.024165
1889.81	0.024696
1891.67	0.024418
1893.54	0.024262
1895.4	0.023639
1897.26	0.024215
1899.13	0.024625
1900.99	0.02378
1902.85	0.0232
1904.72	0.023533
1906.58	0.02391
1908.44	0.023992
1910.31	0.023876
1912.17	0.024703
1914.04	0.024819
1915.9	0.024296
1917.76	0.023839
1919.63	0.024234
1921.49	0.024839
1923.35	0.024904
1925.22	0.025091
1927.08	0.024288
1928.95	0.022951
1930.81	0.022456
1932.67	0.021593
1934.54	0.021348
1936.4	0.022861
1938.26	0.023818
1940.13	0.023245
1941.99	0.023092
1943.86	0.023196
1945.72	0.024397
1947.58	0.023864
1949.45	0.022107
1951.31	0.021787
1953.17	0.02129
1955.04	0.020282
1956.9	0.020739
1958.77	0.0207
1960.63	0.020645
1962.49	0.019649
1964.36	0.017651
1966.22	0.015826
1968.08	0.015899
1969.95	0.018356
1971.81	0.021805
1973.68	0.023848
1975.54	0.026045
1977.4	0.025099
1979.27	0.020562
1981.13	0.020176
1982.99	0.022794
1984.86	0.023048
1986.72	0.024215
1988.58	0.02417
1990.45	0.025309
1992.31	0.026009
1994.18	0.023554
1996.04	0.022497
1997.9	0.025048
1999.77	0.025534
2001.63	0.022352
2003.49	0.020206
2005.36	0.021442
2007.22	0.021366
2009.09	0.020264
2010.95	0.021917
2012.81	0.024571
2014.68	0.025106
2016.54	0.022434
2018.4	0.018691
2020.27	0.020729
2022.13	0.02339
2024	0.022526
2025.86	0.024011
2027.72	0.023678
2029.59	0.02005
2031.45	0.020116
2033.31	0.022612
2035.18	0.024774
2037.04	0.023607
2038.91	0.023154
2040.77	0.025159
2042.63	0.026651
2044.5	0.026331
2046.36	0.025278
2048.22	0.026617
2050.09	0.029777
2051.95	0.030396
2053.81	0.029802
2055.68	0.028408
2057.54	0.028261
2059.41	0.029068
2061.27	0.028949
2063.13	0.028922
2065	0.029649
2066.86	0.029349
2068.72	0.028587
2070.59	0.028922
2072.45	0.029751
2074.32	0.029595
2076.18	0.028864
2078.04	0.029207
2079.91	0.031057
2081.77	0.031538
2083.63	0.030889
2085.5	0.03144
2087.36	0.032016
2089.23	0.031648
2091.09	0.030238
2092.95	0.029289
2094.82	0.030373
2096.68	0.031646
2098.54	0.03173
2100.41	0.03118
2102.27	0.030927
2104.14	0.03228
2106	0.034168
2107.86	0.033858
2109.73	0.032303
2111.59	0.031617
2113.45	0.032433
2115.32	0.032641
2117.18	0.032225
2119.04	0.031907
2120.91	0.03079
2122.77	0.030116
2124.64	0.030564
2126.5	0.030361
2128.36	0.029948
2130.23	0.029961
2132.09	0.029376
2133.95	0.027836
2135.82	0.026429
2137.68	0.027463
2139.55	0.029454
2141.41	0.028525
2143.27	0.027061
2145.14	0.027002
2147	0.028849
2148.86	0.028376
2150.73	0.026167
2152.59	0.022136
2154.46	0.018349
2156.32	0.018995
2158.18	0.020295
2160.05	0.022115
2161.91	0.026147
2163.77	0.029472
2165.64	0.028947
2167.5	0.026858
2169.37	0.028536
2171.23	0.029796
2173.09	0.028551
2174.96	0.026703
2176.82	0.026433
2178.68	0.027592
2180.55	0.029093
2182.41	0.029668
2184.27	0.028967
2186.14	0.027891
2188	0.029233
2189.87	0.030702
2191.73	0.029035
2193.59	0.026081
2195.46	0.025338
2197.32	0.02725
2199.18	0.031184
2201.05	0.0329
2202.91	0.031317
2204.78	0.0323
2206.64	0.033624
2208.5	0.030771
2210.37	0.030233
2212.23	0.031839
2214.09	0.031549
2215.96	0.030818
2217.82	0.030411
2219.69	0.030209
2221.55	0.031664
2223.41	0.034066
2225.28	0.03482
2227.14	0.034146
2229	0.033546
2230.87	0.031858
2232.73	0.03102
2234.6	0.031959
2236.46	0.033234
2238.32	0.03335
2240.19	0.033367
2242.05	0.034262
2243.91	0.03507
2245.78	0.033954
2247.64	0.033248
2249.5	0.033583
2251.37	0.034328
2253.23	0.034579
2255.1	0.034355
2256.96	0.034599
2258.82	0.034481
2260.69	0.034572
2262.55	0.034645
2264.41	0.036234
2266.28	0.038519
2268.14	0.036959
2270.01	0.035431
2271.87	0.037094
2273.73	0.037707
2275.6	0.037874
2277.46	0.038756
2279.32	0.038479
2281.19	0.038668
2283.05	0.039163
2284.92	0.039214
2286.78	0.039387
2288.64	0.039785
2290.51	0.039886
2292.37	0.039428
2294.23	0.039295
2296.1	0.04012
2297.96	0.040882
2299.83	0.041166
2301.69	0.04073
2303.55	0.040108
2305.42	0.039868
2307.28	0.040138
2309.14	0.041216
2311.01	0.041237
2312.87	0.040365
2314.74	0.040732
2316.6	0.041519
2318.46	0.041648
2320.33	0.041692
2322.19	0.041855
2324.05	0.041773
2325.92	0.041388
2327.78	0.040995
2329.64	0.041127
2331.51	0.040953
2333.37	0.040115
2335.24	0.039447
2337.1	0.039932
2338.96	0.040389
2340.83	0.040237
2342.69	0.041086
2344.55	0.04242
2346.42	0.042111
2348.28	0.041342
2350.15	0.040846
2352.01	0.040147
2353.87	0.040145
2355.74	0.040563
2357.6	0.040511
2359.46	0.041146
2361.33	0.04183
2363.19	0.04154
2365.06	0.041006
2366.92	0.040774
2368.78	0.041334
2370.65	0.042423
2372.51	0.042936
2374.37	0.042884
2376.24	0.042453
2378.1	0.042433
2379.97	0.042361
2381.83	0.042106
2383.69	0.042494
2385.56	0.042685
2387.42	0.042622
2389.28	0.042581
2391.15	0.041919
2393.01	0.041678
2394.87	0.042244
2396.74	0.042388
2398.6	0.042402
2400.47	0.042825
2402.33	0.042875
2404.19	0.042658
2406.06	0.042728
2407.92	0.043239
2409.78	0.043503
2411.65	0.043784
2413.51	0.043816
2415.38	0.043071
2417.24	0.043039
2419.1	0.043723
2420.97	0.043981
2422.83	0.043915
2424.69	0.043661
2426.56	0.043468
2428.42	0.043091
2430.29	0.043487
2432.15	0.045007
2434.01	0.045219
2435.88	0.044454
2437.74	0.044475
2439.6	0.044564
2441.47	0.044717
2443.33	0.044728
2445.2	0.044938
2447.06	0.045604
2448.92	0.046249
2450.79	0.046508
2452.65	0.046148
2454.51	0.045657
2456.38	0.045908
2458.24	0.046327
2460.1	0.046477
2461.97	0.046061
2463.83	0.045612
2465.7	0.04534
2467.56	0.045583
2469.42	0.046229
2471.29	0.046177
2473.15	0.046324
2475.01	0.046871
2476.88	0.046739
2478.74	0.046658
2480.61	0.046947
2482.47	0.047099
2484.33	0.046946
2486.2	0.046572
2488.06	0.046638
2489.92	0.047666
2491.79	0.048924
2493.65	0.048991
2495.52	0.048135
2497.38	0.047357
2499.24	0.04724
2501.11	0.048313
2502.97	0.048808
2504.83	0.048624
2506.7	0.048817
2508.56	0.048471
2510.43	0.048078
2512.29	0.048513
2514.15	0.048564
2516.02	0.048658
2517.88	0.049319
2519.74	0.049334
2521.61	0.048977
2523.47	0.048721
2525.33	0.048497
2527.2	0.049216
2529.06	0.050144
2530.93	0.050454
2532.79	0.050456
2534.65	0.050617
2536.52	0.05071
2538.38	0.050271
2540.24	0.049799
2542.11	0.04993
2543.97	0.050025
2545.84	0.050473
2547.7	0.051492
2549.56	0.051869
2551.43	0.051351
2553.29	0.051182
2555.15	0.051766
2557.02	0.051892
2558.88	0.051733
2560.75	0.05194
2562.61	0.052476
2564.47	0.053006
2566.34	0.052947
2568.2	0.052491
2570.06	0.052073
2571.93	0.052252
2573.79	0.052486
2575.66	0.052538
2577.52	0.052714
2579.38	0.053378
2581.25	0.053708
2583.11	0.053566
2584.97	0.05401
2586.84	0.054957
2588.7	0.055295
2590.56	0.054738
2592.43	0.054424
2594.29	0.054909
2596.16	0.055638
2598.02	0.056017
2599.88	0.055991
2601.75	0.056142
2603.61	0.05644
2605.47	0.05675
2607.34	0.057438
2609.2	0.058021
2611.07	0.057936
2612.93	0.057704
2614.79	0.058226
2616.66	0.058636
2618.52	0.058419
2620.38	0.058886
2622.25	0.059233
2624.11	0.059178
2625.98	0.059433
2627.84	0.059933
2629.7	0.060143
2631.57	0.060096
2633.43	0.060217
2635.29	0.060502
2637.16	0.060731
2639.02	0.061018
2640.89	0.061298
2642.75	0.061704
2644.61	0.061816
2646.48	0.061946
2648.34	0.061865
2650.2	0.061503
2652.07	0.061825
2653.93	0.062297
2655.79	0.062385
2657.66	0.062354
2659.52	0.062188
2661.39	0.061871
2663.25	0.061932
2665.11	0.062189
2666.98	0.062224
2668.84	0.062411
2670.7	0.062675
2672.57	0.062539
2674.43	0.062387
2676.3	0.062538
2678.16	0.062887
2680.02	0.063493
2681.89	0.063612
2683.75	0.063242
2685.61	0.06294
2687.48	0.062961
2689.34	0.063327
2691.21	0.063899
2693.07	0.064069
2694.93	0.063994
2696.8	0.064301
2698.66	0.064556
2700.52	0.064687
2702.39	0.065201
2704.25	0.065335
2706.12	0.0654
2707.98	0.065805
2709.84	0.065989
2711.71	0.065783
2713.57	0.065678
2715.43	0.06587
2717.3	0.065978
2719.16	0.066257
2721.03	0.066858
2722.89	0.067252
2724.75	0.067444
2726.62	0.068128
2728.48	0.068538
2730.34	0.06838
2732.21	0.068524
2734.07	0.068903
2735.93	0.06917
2737.8	0.069525
2739.66	0.069874
2741.53	0.070012
2743.39	0.070202
2745.25	0.070242
2747.12	0.070266
2748.98	0.070755
2750.84	0.071857
2752.71	0.072525
2754.57	0.071828
2756.44	0.071241
2758.3	0.071644
2760.16	0.072382
2762.03	0.073057
2763.89	0.073614
2765.75	0.07368
2767.62	0.073318
2769.48	0.073504
2771.35	0.074105
2773.21	0.074669
2775.07	0.075193
2776.94	0.075543
2778.8	0.075809
2780.66	0.076127
2782.53	0.076165
2784.39	0.076244
2786.26	0.076355
2788.12	0.076229
2789.98	0.076556
2791.85	0.077348
2793.71	0.077916
2795.57	0.077991
2797.44	0.078059
2799.3	0.078871
2801.16	0.079652
2803.03	0.079557
2804.89	0.079292
2806.76	0.079738
2808.62	0.080576
2810.48	0.080918
2812.35	0.080982
2814.21	0.081463
2816.07	0.081866
2817.94	0.082021
2819.8	0.082192
2821.67	0.082688
2823.53	0.083255
2825.39	0.083644
2827.26	0.083905
2829.12	0.083981
2830.98	0.08397
2832.85	0.084203
2834.71	0.084845
2836.58	0.085764
2838.44	0.086562
2840.3	0.087113
2842.17	0.087538
2844.03	0.087952
2845.89	0.088514
2847.76	0.08929
2849.62	0.090018
2851.49	0.091034
2853.35	0.091906
2855.21	0.091887
2857.08	0.091952
2858.94	0.093016
2860.8	0.09403
2862.67	0.094828
2864.53	0.096279
2866.39	0.097208
2868.26	0.097655
2870.12	0.098173
2871.99	0.098545
2873.85	0.099068
2875.71	0.09968
2877.58	0.099706
2879.44	0.099014
2881.3	0.098549
2883.17	0.098218
2885.03	0.097865
2886.9	0.098021
2888.76	0.098207
2890.62	0.09797
2892.49	0.098216
2894.35	0.099104
2896.21	0.100002
2898.08	0.100279
2899.94	0.099824
2901.81	0.099732
2903.67	0.100903
2905.53	0.101869
2907.4	0.102437
2909.26	0.103187
2911.12	0.103894
2912.99	0.10468
2914.85	0.105721
2916.72	0.106977
2918.58	0.1081
2920.44	0.109027
2922.31	0.110339
2924.17	0.111368
2926.03	0.111903
2927.9	0.112091
2929.76	0.112485
2931.62	0.113364
2933.49	0.113534
2935.35	0.112666
2937.22	0.112171
2939.08	0.111901
2940.94	0.111695
2942.81	0.110982
2944.67	0.110065
2946.53	0.110082
2948.4	0.109988
2950.26	0.109962
2952.13	0.110433
2953.99	0.110762
2955.85	0.110671
2957.72	0.110032
2959.58	0.109359
2961.44	0.109012
2963.31	0.109154
2965.17	0.108626
2967.04	0.107554
2968.9	0.107245
2970.76	0.107117
2972.63	0.106706
2974.49	0.10639
2976.35	0.106096
2978.22	0.105947
2980.08	0.105897
2981.95	0.105313
2983.81	0.10395
2985.67	0.103131
2987.54	0.103152
2989.4	0.102727
2991.26	0.101467
2993.13	0.101028
2994.99	0.101392
2996.85	0.101207
2998.72	0.10074
3000.58	0.100964
3002.45	0.101132
3004.31	0.101133
3006.17	0.100994
3008.04	0.100407
3009.9	0.100531
3011.76	0.101519
3013.63	0.101579
3015.49	0.102047
3017.36	0.103386
3019.22	0.103988
3021.08	0.10417
3022.95	0.10449
3024.81	0.105029
3026.67	0.105499
3028.54	0.106033
3030.4	0.106777
3032.27	0.107671
3034.13	0.108406
3035.99	0.108472
3037.86	0.108429
3039.72	0.109255
3041.58	0.109898
3043.45	0.110302
3045.31	0.111086
3047.18	0.111802
3049.04	0.112494
3050.9	0.112308
3052.77	0.11246
3054.63	0.112468
3056.49	0.112681
3058.36	0.11354
3060.22	0.113482
3062.09	0.113092
3063.95	0.113259
3065.81	0.113797
3067.68	0.113985
3069.54	0.114044
3071.4	0.114092
3073.27	0.113545
3075.13	0.113373
3076.99	0.113004
3078.86	0.112196
3080.72	0.11191
3082.59	0.11232
3084.45	0.11224
3086.31	0.111005
3088.18	0.110517
3090.04	0.111426
3091.9	0.111266
3093.77	0.110256
3095.63	0.109167
3097.5	0.108029
3099.36	0.1082
3101.22	0.109347
3103.09	0.108897
3104.95	0.107823
3106.81	0.108075
3108.68	0.10838
3110.54	0.108371
3112.41	0.10792
3114.27	0.107036
3116.13	0.107299
3118	0.108227
3119.86	0.109171
3121.72	0.109979
3123.59	0.109561
3125.45	0.108632
3127.32	0.108882
3129.18	0.109582
3131.04	0.110473
3132.91	0.111213
3134.77	0.111214
3136.63	0.111538
3138.5	0.111833
3140.36	0.111716
3142.22	0.112688
3144.09	0.113481
3145.95	0.114367
3147.82	0.115167
3149.68	0.115617
3151.54	0.11623
3153.41	0.116702
3155.27	0.117104
3157.13	0.117682
3159	0.117864
3160.86	0.118575
3162.73	0.119368
3164.59	0.119643
3166.45	0.120193
3168.32	0.120922
3170.18	0.121256
3172.04	0.122296
3173.91	0.122959
3175.77	0.123257
3177.64	0.123522
3179.5	0.123695
3181.36	0.124174
3183.23	0.125239
3185.09	0.126456
3186.95	0.127272
3188.82	0.127144
3190.68	0.127564
3192.55	0.1279
3194.41	0.127886
3196.27	0.128089
3198.14	0.128675
3200	0.129501
3201.86	0.129729
3203.73	0.129506
3205.59	0.129634
3207.45	0.130197
3209.32	0.130069
3211.18	0.130316
3213.05	0.131724
3214.91	0.132381
3216.77	0.131758
3218.64	0.131606
3220.5	0.13211
3222.36	0.131602
3224.23	0.131309
3226.09	0.132018
3227.96	0.132416
3229.82	0.131843
3231.68	0.132157
3233.55	0.133294
3235.41	0.134276
3237.27	0.133926
3239.14	0.133001
3241	0.133423
3242.87	0.134801
3244.73	0.134476
3246.59	0.134269
3248.46	0.135078
3250.32	0.136096
3252.18	0.136339
3254.05	0.135555
3255.91	0.136084
3257.78	0.136889
3259.64	0.136439
3261.5	0.13693
3263.37	0.137628
3265.23	0.137102
3267.09	0.136605
3268.96	0.13645
3270.82	0.136472
3272.68	0.137534
3274.55	0.138092
3276.41	0.13799
3278.28	0.136541
3280.14	0.135394
3282	0.13582
3283.87	0.135668
3285.73	0.134232
3287.59	0.133639
3289.46	0.133147
3291.32	0.132703
3293.19	0.132239
3295.05	0.132584
3296.91	0.132481
3298.78	0.131114
3300.64	0.13024
3302.5	0.129716
3304.37	0.128727
3306.23	0.128163
3308.1	0.128841
3309.96	0.129421
3311.82	0.12831
3313.69	0.125606
3315.55	0.123883
3317.41	0.123123
3319.28	0.12223
3321.14	0.121731
3323.01	0.122728
3324.87	0.122023
3326.73	0.120899
3328.6	0.120434
3330.46	0.118846
3332.32	0.118379
3334.19	0.117949
3336.05	0.117106
3337.91	0.116762
3339.78	0.115943
3341.64	0.115556
3343.51	0.115222
3345.37	0.114016
3347.23	0.112889
3349.1	0.111809
3350.96	0.111376
3352.82	0.111133
3354.69	0.109926
3356.55	0.107626
3358.42	0.107202
3360.28	0.10757
3362.14	0.107709
3364.01	0.107074
3365.87	0.105384
3367.73	0.104492
3369.6	0.105007
3371.46	0.105176
3373.33	0.10373
3375.19	0.102594
3377.05	0.101645
3378.92	0.100018
3380.78	0.099612
3382.64	0.099119
3384.51	0.098508
3386.37	0.098374
3388.24	0.098499
3390.1	0.098158
3391.96	0.097023
3393.83	0.095914
3395.69	0.095746
3397.55	0.095162
3399.42	0.093994
3401.28	0.092885
3403.15	0.092239
3405.01	0.091871
3406.87	0.091799
3408.74	0.089823
3410.6	0.088277
3412.46	0.088889
3414.33	0.088623
3416.19	0.088299
3418.05	0.087431
3419.92	0.085706
3421.78	0.085668
3423.65	0.085297
3425.51	0.084476
3427.37	0.084055
3429.24	0.083559
3431.1	0.082225
3432.96	0.080378
3434.83	0.079749
3436.69	0.080726
3438.56	0.080711
3440.42	0.078701
3442.28	0.077485
3444.15	0.077575
3446.01	0.077754
3447.87	0.07785
3449.74	0.077344
3451.6	0.075967
3453.47	0.075173
3455.33	0.075646
3457.19	0.075291
3459.06	0.074287
3460.92	0.07396
3462.78	0.073377
3464.65	0.072228
3466.51	0.072417
3468.38	0.072139
3470.24	0.070201
3472.1	0.070139
3473.97	0.07122
3475.83	0.070569
3477.69	0.069673
3479.56	0.068841
3481.42	0.067916
3483.28	0.067418
3485.15	0.066465
3487.01	0.065795
3488.88	0.066216
3490.74	0.065276
3492.6	0.063859
3494.47	0.065025
3496.33	0.066294
3498.19	0.064494
3500.06	0.062576
3501.92	0.062626
3503.79	0.061908
3505.65	0.060547
3507.51	0.060395
3509.38	0.060849
3511.24	0.061801
3513.1	0.060734
3514.97	0.058435
3516.83	0.056995
3518.7	0.055797
3520.56	0.055735
3522.42	0.056634
3524.29	0.055321
3526.15	0.054792
3528.01	0.05491
3529.88	0.055312
3531.74	0.054185
3533.61	0.052074
3535.47	0.051001
3537.33	0.051082
3539.2	0.050059
3541.06	0.048963
3542.92	0.048654
3544.79	0.048094
3546.65	0.047494
3548.51	0.04716
3550.38	0.04622
3552.24	0.046797
3554.11	0.046973
3555.97	0.044908
3557.83	0.04274
3559.7	0.041515
3561.56	0.041595
3563.42	0.042407
3565.29	0.041543
3567.15	0.040755
3569.02	0.041599
3570.88	0.040264
3572.74	0.040413
3574.61	0.041031
3576.47	0.039378
3578.33	0.037385
3580.2	0.036925
3582.06	0.035977
3583.93	0.035373
3585.79	0.034475
3587.65	0.035559
3589.52	0.035637
3591.38	0.034364
3593.24	0.034354
3595.11	0.032378
3596.97	0.031158
3598.84	0.031692
3600.7	0.031333
3602.56	0.029703
3604.43	0.02868
3606.29	0.029439
3608.15	0.030059
3610.02	0.028711
3611.88	0.027375
3613.74	0.026835
3615.61	0.026471
3617.47	0.02656
3619.34	0.027668
3621.2	0.028897
3623.06	0.027693
3624.93	0.025637
3626.79	0.024522
3628.65	0.024938
3630.52	0.026677
3632.38	0.025013
3634.25	0.023652
3636.11	0.024959
3637.97	0.024672
3639.84	0.023
3641.7	0.022935
3643.56	0.024047
3645.43	0.023687
3647.29	0.022753
3649.16	0.022501
3651.02	0.022879
3652.88	0.022106
3654.75	0.021389
3656.61	0.021792
3658.47	0.02182
3660.34	0.020872
3662.2	0.020568
3664.07	0.019561
3665.93	0.019733
3667.79	0.021694
3669.66	0.022478
3671.52	0.021177
3673.38	0.020313
3675.25	0.020013
3677.11	0.020006
3678.97	0.019821
3680.84	0.019918
3682.7	0.019979
3684.57	0.01921
3686.43	0.018312
3688.29	0.019853
3690.16	0.02242
3692.02	0.021432
3693.88	0.019334
3695.75	0.018771
3697.61	0.019102
3699.48	0.018815
3701.34	0.019389
3703.2	0.020665
3705.07	0.019864
3706.93	0.018941
3708.79	0.019264
3710.66	0.020098
3712.52	0.021995
3714.39	0.022296
3716.25	0.020564
3718.11	0.018911
3719.98	0.018565
3721.84	0.019462
3723.7	0.019301
3725.57	0.018695
3727.43	0.020056
3729.3	0.021294
3731.16	0.020185
3733.02	0.018901
3734.89	0.018957
3736.75	0.020129
3738.61	0.020356
3740.48	0.018648
3742.34	0.018325
3744.21	0.019713
3746.07	0.022279
3747.93	0.022474
3749.8	0.021348
3751.66	0.02098
3753.52	0.020719
3755.39	0.020119
3757.25	0.020695
3759.11	0.021651
3760.98	0.023358
3762.84	0.022717
3764.71	0.02092
3766.57	0.021284
3768.43	0.021903
3770.3	0.021624
3772.16	0.021756
3774.02	0.022389
3775.89	0.021947
3777.75	0.020696
3779.62	0.020709
3781.48	0.021833
3783.34	0.022096
3785.21	0.022292
3787.07	0.021784
3788.93	0.020555
3790.8	0.020065
3792.66	0.020951
3794.53	0.021564
3796.39	0.021008
3798.25	0.020934
3800.12	0.02145
3801.98	0.022901
3803.84	0.023596
3805.71	0.021362
3807.57	0.021518
3809.44	0.022074
3811.3	0.020826
3813.16	0.020852
3815.03	0.021244
3816.89	0.021348
3818.75	0.020966
3820.62	0.021278
3822.48	0.023633
3824.34	0.023632
3826.21	0.021858
3828.07	0.021924
3829.94	0.021976
3831.8	0.020863
3833.66	0.019753
3835.53	0.01977
3837.39	0.021052
3839.25	0.022316
3841.12	0.023838
3842.98	0.0233
3844.85	0.021594
3846.71	0.021475
3848.57	0.022148
3850.44	0.022216
3852.3	0.021797
3854.16	0.022428
3856.03	0.024351
3857.89	0.023761
3859.76	0.022567
3861.62	0.020646
3863.48	0.020213
3865.35	0.021476
3867.21	0.022853
3869.07	0.023058
3870.94	0.024229
3872.8	0.024063
3874.67	0.023713
3876.53	0.022964
3878.39	0.022238
3880.26	0.023163
3882.12	0.023914
3883.98	0.023211
3885.85	0.022844
3887.71	0.023133
3889.57	0.022557
3891.44	0.02253
3893.3	0.023414
3895.17	0.022419
3897.03	0.021497
3898.89	0.021669
3900.76	0.022597
3902.62	0.023493
3904.48	0.023497
3906.35	0.022993
3908.21	0.023131
3910.08	0.023055
3911.94	0.023156
3913.8	0.023971
3915.67	0.023904
3917.53	0.023166
3919.39	0.023031
3921.26	0.023494
3923.12	0.023417
3924.99	0.023299
3926.85	0.023964
3928.71	0.023374
3930.58	0.023772
3932.44	0.02489
3934.3	0.02442
3936.17	0.023306
3938.03	0.023345
3939.9	0.023771
3941.76	0.024402
3943.62	0.024449
3945.49	0.02436
3947.35	0.023422
3949.21	0.024062
3951.08	0.024037
3952.94	0.023931
3954.8	0.024411
3956.67	0.024509
3958.53	0.024346
3960.4	0.024362
3962.26	0.024358
3964.12	0.024456
3965.99	0.023953
3967.85	0.023644
3969.71	0.024537
3971.58	0.024908
3973.44	0.024004
3975.31	0.023017
3977.17	0.02339
3979.03	0.023858
3980.9	0.024076
3982.76	0.024556
3984.62	0.024815
3986.49	0.024253
3988.35	0.023465
3990.22	0.023469
3992.08	0.024247
3993.94	0.024912
3995.81	0.024856
3997.67	0.024175
3999.53	0.024285
