# Supplementary material for: Biochemical analysis of collagens from the bone of lizardfish (Saurida tumbil Bloch, 1795) extracted with different acids
Source: PeerJ. 2022 Mar 15;10:e13103. doi: 10.7717/peerj.13103 (PMC8932308; doi:10.7717/peerj.13103)
Supplement: Figure S4 [file peerj-10-13103-s005.xlsx]

## Sheet: AaEC
Sampel AaEC
2θ - °	Intensity - cps
5	6302.06
5.01	6299.77
5.02	6297.93
5.03	6296.55
5.04	6295.6
5.05	6295.1
5.06	6295.03
5.07	6295.39
5.08	6296.19
5.09	6297.41
5.1	6299.05
5.11	6301.1
5.12	6303.57
5.13	6306.45
5.14	6309.74
5.15	6313.43
5.16	6317.52
5.17	6321.99
5.18	6326.87
5.19	6332.12
5.2	6337.76
5.21	6343.78
5.22	6350.18
5.23	6356.94
5.24	6364.07
5.25	6371.57
5.26	6379.42
5.27	6387.63
5.28	6396.19
5.29	6405.11
5.3	6414.36
5.31	6423.95
5.32	6433.89
5.33	6444.15
5.34	6454.74
5.35	6465.66
5.36	6476.9
5.37	6488.45
5.38	6500.32
5.39	6512.5
5.4	6524.99
5.41	6537.77
5.42	6550.86
5.43	6564.23
5.44	6577.9
5.45	6591.86
5.46	6606.09
5.47	6620.61
5.48	6635.4
5.49	6650.46
5.5	6665.79
5.51	6681.38
5.52	6697.23
5.53	6713.34
5.54	6729.7
5.55	6746.3
5.56	6763.15
5.57	6780.24
5.58	6797.57
5.59	6815.13
5.6	6832.92
5.61	6850.93
5.62	6869.16
5.63	6887.61
5.64	6906.28
5.65	6925.15
5.66	6944.23
5.67	6963.51
5.68	6982.99
5.69	7002.66
5.7	7022.52
5.71	7042.57
5.72	7062.8
5.73	7083.21
5.74	7103.79
5.75	7124.54
5.76	7145.47
5.77	7166.55
5.78	7187.79
5.79	7209.19
5.8	7230.74
5.81	7252.44
5.82	7274.28
5.83	7296.27
5.84	7318.39
5.85	7340.64
5.86	7363.02
5.87	7385.52
5.88	7408.14
5.89	7430.88
5.9	7453.74
5.91	7476.7
5.92	7499.77
5.93	7522.94
5.94	7546.21
5.95	7569.57
5.96	7593.02
5.97	7616.56
5.98	7640.18
5.99	7663.88
6	7687.65
6.01	7711.5
6.02	7735.41
6.03	7759.38
6.04	7783.41
6.05	7807.5
6.06	7831.64
6.07	7855.83
6.08	7880.06
6.09	7904.33
6.1	7928.64
6.11	7952.97
6.12	7977.34
6.13	8001.73
6.14	8026.14
6.15	8050.57
6.16	8075.01
6.17	8099.47
6.18	8123.92
6.19	8148.38
6.2	8172.83
6.21	8197.28
6.22	8221.72
6.23	8246.14
6.24	8270.55
6.25	8294.93
6.26	8319.29
6.27	8343.62
6.28	8367.92
6.29	8392.18
6.3	8416.4
6.31	8440.57
6.32	8464.69
6.33	8488.76
6.34	8512.78
6.35	8536.73
6.36	8560.62
6.37	8584.45
6.38	8608.2
6.39	8631.87
6.4	8655.47
6.41	8678.98
6.42	8702.41
6.43	8725.74
6.44	8748.98
6.45	8772.12
6.46	8795.16
6.47	8818.09
6.48	8840.91
6.49	8863.62
6.5	8886.21
6.51	8908.67
6.52	8931.01
6.53	8953.23
6.54	8975.3
6.55	8997.24
6.56	9019.04
6.57	9040.7
6.58	9062.2
6.59	9083.56
6.6	9104.75
6.61	9125.79
6.62	9146.66
6.63	9167.36
6.64	9187.9
6.65	9208.25
6.66	9228.43
6.67	9248.42
6.68	9268.23
6.69	9287.84
6.7	9307.26
6.71	9326.48
6.72	9345.49
6.73	9364.31
6.74	9382.9
6.75	9401.29
6.76	9419.46
6.77	9437.4
6.78	9455.12
6.79	9472.61
6.8	9489.87
6.81	9506.89
6.82	9523.66
6.83	9540.2
6.84	9556.48
6.85	9572.51
6.86	9588.28
6.87	9603.8
6.88	9619.05
6.89	9634.03
6.9	9648.73
6.91	9663.17
6.92	9677.32
6.93	9691.19
6.94	9704.77
6.95	9718.57
6.96	9732.65
6.97	9746.38
6.98	9759.23
6.99	9770.73
7	9780.51
7.01	9788.29
7.02	9793.85
7.03	9797.09
7.04	9797.99
7.05	9796.59
7.06	9793.08
7.07	9787.69
7.08	9780.75
7.09	9772.71
7.1	9764.08
7.11	9755.47
7.12	9747.58
7.13	9741.19
7.14	9735.67
7.15	9729.83
7.16	9723.67
7.17	9717.19
7.18	9710.4
7.19	9703.31
7.2	9695.91
7.21	9688.2
7.22	9680.2
7.23	9671.91
7.24	9663.32
7.25	9654.44
7.26	9645.28
7.27	9635.83
7.28	9626.1
7.29	9616.1
7.3	9605.83
7.31	9595.29
7.32	9584.48
7.33	9573.41
7.34	9562.08
7.35	9550.49
7.36	9538.65
7.37	9526.56
7.38	9514.23
7.39	9501.65
7.4	9488.83
7.41	9475.78
7.42	9462.49
7.43	9448.98
7.44	9435.23
7.45	9421.26
7.46	9407.08
7.47	9392.68
7.48	9378.06
7.49	9363.23
7.5	9348.2
7.51	9332.96
7.52	9317.52
7.53	9301.89
7.54	9286.06
7.55	9270.04
7.56	9253.84
7.57	9237.45
7.58	9220.88
7.59	9204.13
7.6	9187.21
7.61	9170.12
7.62	9152.86
7.63	9135.44
7.64	9117.85
7.65	9100.11
7.66	9082.22
7.67	9064.17
7.68	9045.98
7.69	9027.64
7.7	9009.16
7.71	8990.54
7.72	8971.79
7.73	8952.9
7.74	8933.89
7.75	8914.75
7.76	8895.5
7.77	8876.12
7.78	8856.63
7.79	8837.03
7.8	8817.32
7.81	8797.5
7.82	8777.58
7.83	8757.57
7.84	8737.46
7.85	8717.25
7.86	8696.96
7.87	8676.58
7.88	8656.13
7.89	8635.59
7.9	8614.98
7.91	8594.29
7.92	8573.54
7.93	8552.72
7.94	8531.83
7.95	8510.89
7.96	8489.9
7.97	8468.85
7.98	8447.75
7.99	8426.6
8	8405.42
8.01	8384.19
8.02	8362.93
8.03	8341.63
8.04	8320.31
8.05	8298.96
8.06	8277.58
8.07	8256.19
8.08	8234.78
8.09	8213.36
8.1	8191.93
8.11	8170.49
8.12	8149.04
8.13	8127.6
8.14	8106.16
8.15	8084.73
8.16	8063.31
8.17	8041.9
8.18	8020.51
8.19	7999.13
8.2	7977.78
8.21	7956.46
8.22	7935.17
8.23	7913.91
8.24	7892.68
8.25	7871.5
8.26	7850.35
8.27	7829.26
8.28	7808.21
8.29	7787.22
8.3	7766.28
8.31	7745.4
8.32	7724.58
8.33	7703.83
8.34	7683.15
8.35	7662.54
8.36	7642.01
8.37	7621.55
8.38	7601.18
8.39	7580.89
8.4	7560.69
8.41	7540.58
8.42	7520.57
8.43	7500.66
8.44	7480.85
8.45	7461.14
8.46	7441.55
8.47	7422.06
8.48	7402.69
8.49	7383.44
8.5	7364.31
8.51	7345.3
8.52	7326.42
8.53	7307.68
8.54	7289.06
8.55	7270.59
8.56	7252.26
8.57	7234.07
8.58	7216.03
8.59	7198.14
8.6	7180.41
8.61	7162.83
8.62	7145.41
8.63	7128.16
8.64	7111.08
8.65	7094.16
8.66	7077.43
8.67	7060.86
8.68	7044.48
8.69	7028.29
8.7	7012.28
8.71	6996.46
8.72	6980.83
8.73	6965.4
8.74	6950.18
8.75	6935.15
8.76	6920.33
8.77	6905.73
8.78	6891.33
8.79	6877.16
8.8	6863.2
8.81	6849.47
8.82	6835.96
8.83	6822.69
8.84	6809.64
8.85	6796.84
8.86	6784.27
8.87	6771.94
8.88	6759.87
8.89	6748.04
8.9	6736.46
8.91	6725.15
8.92	6714.09
8.93	6703.29
8.94	6692.76
8.95	6682.5
8.96	6672.51
8.97	6662.8
8.98	6653.36
8.99	6644.22
9	6635.27
9.01	6626.41
9.02	6617.51
9.03	6608.45
9.04	6599.14
9.05	6589.47
9.06	6579.38
9.07	6568.81
9.08	6557.74
9.09	6546.16
9.1	6534.11
9.11	6521.64
9.12	6508.88
9.13	6495.98
9.14	6483.14
9.15	6470.62
9.16	6458.74
9.17	6447.88
9.18	6437.72
9.19	6427.64
9.2	6417.63
9.21	6407.7
9.22	6397.85
9.23	6388.08
9.24	6378.38
9.25	6368.76
9.26	6359.22
9.27	6349.75
9.28	6340.36
9.29	6331.04
9.3	6321.8
9.31	6312.63
9.32	6303.53
9.33	6294.52
9.34	6285.57
9.35	6276.69
9.36	6267.89
9.37	6259.17
9.38	6250.51
9.39	6241.93
9.4	6233.41
9.41	6224.97
9.42	6216.6
9.43	6208.31
9.44	6200.08
9.45	6191.92
9.46	6183.83
9.47	6175.81
9.48	6167.86
9.49	6159.98
9.5	6152.16
9.51	6144.42
9.52	6136.74
9.53	6129.13
9.54	6121.59
9.55	6114.11
9.56	6106.71
9.57	6099.36
9.58	6092.09
9.59	6084.88
9.6	6077.73
9.61	6070.65
9.62	6063.63
9.63	6056.68
9.64	6049.79
9.65	6042.97
9.66	6036.21
9.67	6029.51
9.68	6022.87
9.69	6016.3
9.7	6009.79
9.71	6003.34
9.72	5996.95
9.73	5990.63
9.74	5984.36
9.75	5978.16
9.76	5972.01
9.77	5965.93
9.78	5959.9
9.79	5953.94
9.8	5948.03
9.81	5942.18
9.82	5936.39
9.83	5930.66
9.84	5924.99
9.85	5919.37
9.86	5913.81
9.87	5908.31
9.88	5902.86
9.89	5897.47
9.9	5892.13
9.91	5886.85
9.92	5881.63
9.93	5876.46
9.94	5871.34
9.95	5866.28
9.96	5861.27
9.97	5856.32
9.98	5851.42
9.99	5846.57
10	5841.78
10.01	5837.03
10.02	5832.34
10.03	5827.7
10.04	5823.12
10.05	5818.58
10.06	5814.09
10.07	5809.66
10.08	5805.27
10.09	5800.94
10.1	5796.65
10.11	5792.41
10.12	5788.22
10.13	5784.08
10.14	5779.99
10.15	5775.94
10.16	5771.94
10.17	5767.99
10.18	5764.09
10.19	5760.23
10.2	5756.42
10.21	5752.66
10.22	5748.94
10.23	5745.27
10.24	5741.64
10.25	5738.05
10.26	5734.51
10.27	5731.02
10.28	5727.56
10.29	5724.16
10.3	5720.79
10.31	5717.47
10.32	5714.19
10.33	5710.95
10.34	5707.75
10.35	5704.6
10.36	5701.48
10.37	5698.41
10.38	5695.37
10.39	5692.38
10.4	5689.43
10.41	5686.52
10.42	5683.64
10.43	5680.81
10.44	5678.01
10.45	5675.25
10.46	5672.53
10.47	5669.85
10.48	5667.2
10.49	5664.59
10.5	5662.02
10.51	5659.48
10.52	5656.98
10.53	5654.52
10.54	5652.09
10.55	5649.7
10.56	5647.34
10.57	5645.02
10.58	5642.73
10.59	5640.47
10.6	5638.24
10.61	5636.06
10.62	5633.9
10.63	5631.77
10.64	5629.68
10.65	5627.62
10.66	5625.59
10.67	5623.6
10.68	5621.63
10.69	5619.69
10.7	5617.79
10.71	5615.91
10.72	5614.07
10.73	5612.25
10.74	5610.46
10.75	5608.71
10.76	5606.98
10.77	5605.27
10.78	5603.6
10.79	5601.95
10.8	5600.33
10.81	5598.74
10.82	5597.17
10.83	5595.63
10.84	5594.12
10.85	5592.63
10.86	5591.17
10.87	5589.73
10.88	5588.31
10.89	5586.92
10.9	5585.56
10.91	5584.21
10.92	5582.9
10.93	5581.6
10.94	5580.33
10.95	5579.07
10.96	5577.85
10.97	5576.64
10.98	5575.45
10.99	5574.29
11	5573.15
11.01	5572.02
11.02	5570.92
11.03	5569.48
11.04	5567.48
11.05	5565.12
11.06	5562.57
11.07	5559.98
11.08	5557.5
11.09	5555.22
11.1	5553.24
11.11	5551.64
11.12	5550.46
11.13	5549.74
11.14	5549.49
11.15	5549.71
11.16	5550.37
11.17	5551.43
11.18	5552.84
11.19	5554.51
11.2	5556.35
11.21	5558.24
11.22	5560.11
11.23	5562
11.24	5563.89
11.25	5565.78
11.26	5567.68
11.27	5569.58
11.28	5571.49
11.29	5573.4
11.3	5575.32
11.31	5577.25
11.32	5579.18
11.33	5581.12
11.34	5583.06
11.35	5585.02
11.36	5586.97
11.37	5588.94
11.38	5590.91
11.39	5592.89
11.4	5594.87
11.41	5596.86
11.42	5598.86
11.43	5600.87
11.44	5602.88
11.45	5604.9
11.46	5606.93
11.47	5608.97
11.48	5611.01
11.49	5613.07
11.5	5615.13
11.51	5617.2
11.52	5619.28
11.53	5621.36
11.54	5623.46
11.55	5625.56
11.56	5627.68
11.57	5629.8
11.58	5631.94
11.59	5634.08
11.6	5636.23
11.61	5638.39
11.62	5640.56
11.63	5642.74
11.64	5644.93
11.65	5647.13
11.66	5649.35
11.67	5651.57
11.68	5653.8
11.69	5656.04
11.7	5658.3
11.71	5660.56
11.72	5662.84
11.73	5665.13
11.74	5667.43
11.75	5669.74
11.76	5672.06
11.77	5674.39
11.78	5676.74
11.79	5679.1
11.8	5681.47
11.81	5683.85
11.82	5686.24
11.83	5688.65
11.84	5691.07
11.85	5693.5
11.86	5695.95
11.87	5698.41
11.88	5700.88
11.89	5703.36
11.9	5705.86
11.91	5708.37
11.92	5710.9
11.93	5713.44
11.94	5715.99
11.95	5718.56
11.96	5721.14
11.97	5723.74
11.98	5726.35
11.99	5728.97
12	5731.61
12.01	5734.27
12.02	5736.94
12.03	5739.62
12.04	5742.32
12.05	5745.03
12.06	5747.77
12.07	5750.51
12.08	5753.27
12.09	5756.05
12.1	5758.85
12.11	5761.66
12.12	5764.48
12.13	5767.32
12.14	5770.18
12.15	5773.06
12.16	5775.95
12.17	5778.86
12.18	5781.79
12.19	5784.73
12.2	5787.69
12.21	5790.67
12.22	5793.67
12.23	5796.68
12.24	5799.71
12.25	5802.76
12.26	5805.83
12.27	5808.91
12.28	5812.02
12.29	5815.14
12.3	5818.28
12.31	5821.44
12.32	5824.62
12.33	5827.81
12.34	5831.03
12.35	5834.27
12.36	5837.52
12.37	5840.79
12.38	5844.09
12.39	5847.4
12.4	5850.73
12.41	5854.09
12.42	5857.46
12.43	5860.85
12.44	5864.27
12.45	5867.7
12.46	5871.16
12.47	5874.64
12.48	5878.13
12.49	5881.65
12.5	5885.19
12.51	5888.75
12.52	5892.33
12.53	5895.93
12.54	5899.56
12.55	5903.2
12.56	5906.87
12.57	5910.56
12.58	5914.28
12.59	5918.01
12.6	5921.77
12.61	5925.55
12.62	5929.35
12.63	5933.18
12.64	5937.02
12.65	5940.9
12.66	5944.79
12.67	5948.71
12.68	5952.65
12.69	5956.61
12.7	5960.6
12.71	5964.62
12.72	5968.65
12.73	5972.71
12.74	5976.8
12.75	5980.91
12.76	5985.04
12.77	5989.2
12.78	5993.38
12.79	5997.59
12.8	6001.82
12.81	6006.08
12.82	6010.36
12.83	6014.67
12.84	6019.01
12.85	6023.36
12.86	6027.75
12.87	6032.16
12.88	6036.6
12.89	6041.06
12.9	6045.55
12.91	6050.07
12.92	6054.61
12.93	6059.18
12.94	6063.77
12.95	6068.4
12.96	6073.05
12.97	6077.73
12.98	6082.43
12.99	6087.16
13	6091.92
13.01	6096.71
13.02	6101.52
13.03	6106.37
13.04	6111.24
13.05	6116.14
13.06	6121.06
13.07	6126.12
13.08	6131.27
13.09	6136.36
13.1	6141.24
13.11	6145.81
13.12	6150
13.13	6153.76
13.14	6157.06
13.15	6159.91
13.16	6162.33
13.17	6164.38
13.18	6166.11
13.19	6167.61
13.2	6169
13.21	6170.37
13.22	6171.88
13.23	6173.67
13.24	6175.9
13.25	6178.73
13.26	6181.99
13.27	6185.35
13.28	6188.8
13.29	6192.36
13.3	6196.02
13.31	6199.77
13.32	6203.63
13.33	6207.58
13.34	6211.63
13.35	6215.77
13.36	6220.01
13.37	6224.34
13.38	6228.77
13.39	6233.29
13.4	6237.9
13.41	6242.6
13.42	6247.39
13.43	6252.28
13.44	6257.25
13.45	6262.31
13.46	6267.45
13.47	6272.69
13.48	6278.01
13.49	6283.41
13.5	6288.9
13.51	6294.48
13.52	6300.13
13.53	6305.87
13.54	6311.69
13.55	6317.59
13.56	6323.57
13.57	6329.63
13.58	6335.77
13.59	6341.99
13.6	6348.28
13.61	6354.65
13.62	6361.09
13.63	6367.61
13.64	6374.2
13.65	6380.87
13.66	6387.61
13.67	6394.42
13.68	6401.3
13.69	6408.25
13.7	6415.27
13.71	6422.36
13.72	6429.52
13.73	6436.75
13.74	6444.04
13.75	6451.39
13.76	6458.81
13.77	6466.3
13.78	6473.85
13.79	6481.46
13.8	6489.14
13.81	6496.87
13.82	6504.67
13.83	6512.52
13.84	6520.44
13.85	6528.41
13.86	6536.44
13.87	6544.52
13.88	6552.66
13.89	6560.86
13.9	6569.11
13.91	6577.42
13.92	6585.77
13.93	6594.18
13.94	6602.65
13.95	6611.16
13.96	6619.72
13.97	6628.33
13.98	6636.99
13.99	6645.69
14	6654.45
14.01	6663.25
14.02	6672.09
14.03	6680.98
14.04	6689.92
14.05	6698.89
14.06	6707.91
14.07	6716.97
14.08	6726.07
14.09	6735.21
14.1	6744.4
14.11	6753.61
14.12	6762.87
14.13	6772.16
14.14	6781.5
14.15	6790.86
14.16	6800.26
14.17	6809.7
14.18	6819.16
14.19	6828.67
14.2	6838.2
14.21	6847.76
14.22	6857.35
14.23	6866.98
14.24	6876.63
14.25	6886.31
14.26	6896.02
14.27	6905.75
14.28	6915.51
14.29	6925.3
14.3	6935.1
14.31	6944.94
14.32	6954.79
14.33	6964.67
14.34	6974.57
14.35	6984.49
14.36	6994.43
14.37	7004.38
14.38	7014.36
14.39	7024.35
14.4	7034.36
14.41	7044.39
14.42	7054.43
14.43	7064.49
14.44	7074.56
14.45	7084.64
14.46	7094.73
14.47	7104.84
14.48	7114.96
14.49	7125.09
14.5	7135.22
14.51	7145.37
14.52	7155.52
14.53	7165.68
14.54	7175.84
14.55	7186.02
14.56	7196.19
14.57	7206.37
14.58	7216.55
14.59	7226.74
14.6	7236.93
14.61	7247.11
14.62	7257.3
14.63	7267.49
14.64	7277.68
14.65	7287.86
14.66	7298.04
14.67	7308.22
14.68	7318.39
14.69	7328.56
14.7	7338.72
14.71	7348.88
14.72	7359.03
14.73	7369.17
14.74	7379.3
14.75	7389.42
14.76	7399.53
14.77	7409.64
14.78	7419.73
14.79	7429.8
14.8	7439.86
14.81	7449.91
14.82	7459.95
14.83	7469.97
14.84	7479.97
14.85	7489.95
14.86	7499.92
14.87	7509.87
14.88	7519.8
14.89	7529.71
14.9	7539.59
14.91	7549.46
14.92	7559.3
14.93	7569.12
14.94	7578.92
14.95	7588.69
14.96	7598.44
14.97	7608.16
14.98	7617.85
14.99	7627.52
15	7637.16
15.01	7646.77
15.02	7656.35
15.03	7665.9
15.04	7675.41
15.05	7684.9
15.06	7694.35
15.07	7703.77
15.08	7713.15
15.09	7722.5
15.1	7731.81
15.11	7740.74
15.12	7749.08
15.13	7757.01
15.14	7764.71
15.15	7772.32
15.16	7779.98
15.17	7787.81
15.18	7795.9
15.19	7804.34
15.2	7813.17
15.21	7822.44
15.22	7832.18
15.23	7842.37
15.24	7853
15.25	7864.02
15.26	7875.38
15.27	7886.97
15.28	7898.69
15.29	7910.4
15.3	7922.05
15.31	7933.68
15.32	7945.31
15.33	7956.92
15.34	7968.52
15.35	7980.11
15.36	7991.7
15.37	8003.27
15.38	8014.83
15.39	8026.39
15.4	8037.94
15.41	8049.48
15.42	8061.02
15.43	8072.55
15.44	8084.08
15.45	8095.6
15.46	8107.11
15.47	8118.63
15.48	8130.14
15.49	8141.64
15.5	8153.15
15.51	8164.65
15.52	8176.15
15.53	8187.65
15.54	8199.15
15.55	8210.65
15.56	8222.15
15.57	8233.65
15.58	8245.16
15.59	8256.66
15.6	8268.17
15.61	8279.68
15.62	8291.2
15.63	8302.72
15.64	8314.25
15.65	8325.78
15.66	8337.31
15.67	8348.86
15.68	8360.41
15.69	8371.96
15.7	8383.53
15.71	8395.1
15.72	8406.69
15.73	8418.28
15.74	8429.88
15.75	8441.49
15.76	8453.12
15.77	8464.75
15.78	8476.4
15.79	8488.06
15.8	8499.73
15.81	8511.42
15.82	8523.12
15.83	8534.83
15.84	8546.56
15.85	8558.31
15.86	8570.07
15.87	8581.85
15.88	8593.64
15.89	8605.45
15.9	8617.29
15.91	8629.14
15.92	8641
15.93	8652.89
15.94	8664.8
15.95	8676.73
15.96	8688.68
15.97	8700.65
15.98	8712.65
15.99	8724.67
16	8736.71
16.01	8748.77
16.02	8760.86
16.03	8772.97
16.04	8785.11
16.05	8797.28
16.06	8809.47
16.07	8821.68
16.08	8833.93
16.09	8846.2
16.1	8858.5
16.11	8870.83
16.12	8883.19
16.13	8895.58
16.14	8908
16.15	8920.45
16.16	8932.94
16.17	8945.45
16.18	8958
16.19	8970.58
16.2	8983.19
16.21	8995.83
16.22	9008.52
16.23	9021.23
16.24	9033.99
16.25	9046.77
16.26	9059.6
16.27	9072.46
16.28	9085.36
16.29	9098.3
16.3	9111.27
16.31	9124.29
16.32	9137.34
16.33	9150.44
16.34	9163.57
16.35	9176.75
16.36	9189.97
16.37	9203.23
16.38	9216.53
16.39	9229.87
16.4	9243.26
16.41	9256.7
16.42	9270.18
16.43	9283.7
16.44	9297.27
16.45	9310.89
16.46	9324.55
16.47	9338.26
16.48	9352.02
16.49	9365.82
16.5	9379.68
16.51	9393.58
16.52	9407.53
16.53	9421.54
16.54	9435.59
16.55	9449.7
16.56	9463.86
16.57	9478.07
16.58	9492.33
16.59	9506.65
16.6	9521.02
16.61	9535.45
16.62	9549.93
16.63	9564.46
16.64	9579.06
16.65	9593.7
16.66	9608.41
16.67	9623.17
16.68	9637.99
16.69	9652.87
16.7	9667.81
16.71	9682.81
16.72	9697.86
16.73	9712.98
16.74	9728.16
16.75	9743.4
16.76	9758.71
16.77	9774.07
16.78	9789.5
16.79	9805
16.8	9820.55
16.81	9836.17
16.82	9851.86
16.83	9867.61
16.84	9883.43
16.85	9899.31
16.86	9915.27
16.87	9931.29
16.88	9947.38
16.89	9963.53
16.9	9979.76
16.91	9996.05
16.92	10012.4
16.93	10028.9
16.94	10045.4
16.95	10062
16.96	10078.6
16.97	10095.3
16.98	10112.1
16.99	10129
17	10145.9
17.01	10163
17.02	10180.1
17.03	10197.2
17.04	10214.5
17.05	10231.8
17.06	10249.2
17.07	10266.7
17.08	10284.2
17.09	10301.9
17.1	10319.6
17.11	10337.4
17.12	10355.3
17.13	10373.2
17.14	10391.3
17.15	10409.2
17.16	10427
17.17	10444.5
17.18	10461.7
17.19	10478.7
17.2	10495.4
17.21	10511.9
17.22	10528
17.23	10543.9
17.24	10559.5
17.25	10574.9
17.26	10590.1
17.27	10605.1
17.28	10620.1
17.29	10635
17.3	10650.1
17.31	10665.4
17.32	10681.1
17.33	10697.4
17.34	10714.1
17.35	10730.8
17.36	10747.3
17.37	10763.9
17.38	10780.4
17.39	10796.9
17.4	10813.3
17.41	10829.7
17.42	10846
17.43	10862.3
17.44	10878.6
17.45	10894.8
17.46	10911
17.47	10927.1
17.48	10943.2
17.49	10959.2
17.5	10975.3
17.51	10991.2
17.52	11007.2
17.53	11023.1
17.54	11039
17.55	11054.8
17.56	11070.6
17.57	11086.4
17.58	11102.1
17.59	11117.8
17.6	11133.4
17.61	11149
17.62	11164.6
17.63	11180.2
17.64	11195.7
17.65	11211.2
17.66	11226.6
17.67	11242.1
17.68	11257.5
17.69	11272.8
17.7	11288.1
17.71	11303.4
17.72	11318.7
17.73	11333.9
17.74	11349.1
17.75	11364.3
17.76	11379.5
17.77	11394.6
17.78	11409.7
17.79	11424.8
17.8	11439.8
17.81	11454.8
17.82	11469.8
17.83	11484.7
17.84	11499.7
17.85	11514.6
17.86	11529.5
17.87	11544.3
17.88	11559.1
17.89	11573.9
17.9	11588.7
17.91	11603.5
17.92	11618.2
17.93	11632.9
17.94	11647.6
17.95	11662.3
17.96	11677
17.97	11691.6
17.98	11706.2
17.99	11720.8
18	11735.3
18.01	11749.9
18.02	11764.4
18.03	11778.9
18.04	11793.4
18.05	11807.9
18.06	11822.3
18.07	11836.8
18.08	11851.2
18.09	11865.6
18.1	11880
18.11	11894.4
18.12	11908.7
18.13	11923.1
18.14	11937.4
18.15	11951.7
18.16	11966
18.17	11980.3
18.18	11994.5
18.19	12008.8
18.2	12023
18.21	12037.3
18.22	12051.5
18.23	12065.7
18.24	12079.9
18.25	12094.1
18.26	12108.3
18.27	12122.5
18.28	12136.6
18.29	12150.8
18.3	12164.9
18.31	12179
18.32	12193.1
18.33	12207.3
18.34	12221.4
18.35	12235.5
18.36	12249.6
18.37	12263.7
18.38	12277.8
18.39	12291.8
18.4	12305.9
18.41	12320
18.42	12334
18.43	12348.1
18.44	12362.1
18.45	12376.2
18.46	12390.2
18.47	12404.3
18.48	12418.4
18.49	12432.4
18.5	12446.4
18.51	12460.5
18.52	12474.5
18.53	12488.5
18.54	12502.6
18.55	12516.6
18.56	12530.7
18.57	12544.7
18.58	12558.8
18.59	12572.8
18.6	12586.9
18.61	12600.9
18.62	12615
18.63	12629
18.64	12643.1
18.65	12657.2
18.66	12671.2
18.67	12685.3
18.68	12699.4
18.69	12713.5
18.7	12727.6
18.71	12741.7
18.72	12755.8
18.73	12769.9
18.74	12784
18.75	12798.1
18.76	12812.3
18.77	12826.4
18.78	12840.6
18.79	12854.7
18.8	12868.9
18.81	12883.1
18.82	12897.3
18.83	12911.5
18.84	12925.7
18.85	12939.9
18.86	12954.2
18.87	12968.4
18.88	12982.7
18.89	12997
18.9	13011.3
18.91	13025.6
18.92	13039.9
18.93	13054.2
18.94	13068.6
18.95	13082.9
18.96	13097.3
18.97	13111.7
18.98	13126.1
18.99	13140.6
19	13155
19.01	13169.5
19.02	13184
19.03	13198.5
19.04	13213
19.05	13227.5
19.06	13242.1
19.07	13256.7
19.08	13271.3
19.09	13285.9
19.1	13300.5
19.11	13315.2
19.12	13329.9
19.13	13344.6
19.14	13359.3
19.15	13374
19.16	13388.8
19.17	13403.6
19.18	13418.4
19.19	13433.9
19.2	13450.1
19.21	13466.6
19.22	13483
19.23	13498.7
19.24	13513.5
19.25	13527.1
19.26	13539.3
19.27	13550
19.28	13558.9
19.29	13566.3
19.3	13572
19.31	13576.4
19.32	13579.5
19.33	13581.8
19.34	13583.5
19.35	13585.1
19.36	13587.2
19.37	13590.5
19.38	13594.5
19.39	13598.5
19.4	13602.4
19.41	13606.2
19.42	13609.9
19.43	13613.6
19.44	13617.2
19.45	13620.7
19.46	13624.2
19.47	13627.6
19.48	13631
19.49	13634.2
19.5	13637.5
19.51	13640.6
19.52	13643.7
19.53	13646.7
19.54	13649.7
19.55	13652.6
19.56	13655.4
19.57	13658.2
19.58	13660.9
19.59	13663.6
19.6	13666.2
19.61	13668.7
19.62	13671.2
19.63	13673.6
19.64	13676
19.65	13678.3
19.66	13680.5
19.67	13682.7
19.68	13684.8
19.69	13686.9
19.7	13689
19.71	13690.9
19.72	13692.8
19.73	13694.7
19.74	13696.5
19.75	13698.3
19.76	13700
19.77	13701.6
19.78	13703.2
19.79	13704.8
19.8	13706.3
19.81	13707.7
19.82	13709.1
19.83	13710.5
19.84	13711.8
19.85	13713
19.86	13714.2
19.87	13715.4
19.88	13716.5
19.89	13717.6
19.9	13718.6
19.91	13719.6
19.92	13720.5
19.93	13721.4
19.94	13722.3
19.95	13723.1
19.96	13723.8
19.97	13724.5
19.98	13725.2
19.99	13725.8
20	13726.4
20.01	13727
20.02	13727.5
20.03	13728
20.04	13728.4
20.05	13728.8
20.06	13729.1
20.07	13729.4
20.08	13729.7
20.09	13730
20.1	13730.2
20.11	13730.3
20.12	13730.5
20.13	13730.6
20.14	13730.6
20.15	13730.7
20.16	13730.6
20.17	13730.6
20.18	13730.5
20.19	13730.4
20.2	13730.3
20.21	13730.1
20.22	13729.9
20.23	13729.7
20.24	13729.5
20.25	13729.2
20.26	13728.9
20.27	13728.5
20.28	13728.1
20.29	13727.7
20.3	13727.3
20.31	13726.8
20.32	13726.4
20.33	13725.9
20.34	13725.3
20.35	13724.8
20.36	13724.2
20.37	13723.6
20.38	13723
20.39	13722.3
20.4	13721.6
20.41	13720.9
20.42	13720.2
20.43	13719.5
20.44	13718.7
20.45	13717.9
20.46	13717.1
20.47	13716.3
20.48	13715.5
20.49	13714.6
20.5	13713.7
20.51	13712.8
20.52	13711.9
20.53	13711
20.54	13710
20.55	13709.1
20.56	13708.1
20.57	13707.1
20.58	13706.1
20.59	13705.1
20.6	13704.1
20.61	13703
20.62	13702
20.63	13700.9
20.64	13699.8
20.65	13698.8
20.66	13697.6
20.67	13696.5
20.68	13695.4
20.69	13694.3
20.7	13693.1
20.71	13692
20.72	13690.9
20.73	13689.7
20.74	13688.5
20.75	13687.4
20.76	13686.2
20.77	13685
20.78	13683.8
20.79	13682.6
20.8	13681.4
20.81	13680.2
20.82	13679
20.83	13677.8
20.84	13676.6
20.85	13675.4
20.86	13674.1
20.87	13672.9
20.88	13671.7
20.89	13670.5
20.9	13669.3
20.91	13668.1
20.92	13666.9
20.93	13665.7
20.94	13664.5
20.95	13663.2
20.96	13662
20.97	13660.9
20.98	13659.7
20.99	13658.5
21	13657.3
21.01	13656.1
21.02	13654.9
21.03	13653.8
21.04	13652.6
21.05	13651.5
21.06	13650.3
21.07	13649.2
21.08	13648.1
21.09	13647
21.1	13645.9
21.11	13644.8
21.12	13643.7
21.13	13642.6
21.14	13641.5
21.15	13640.5
21.16	13639.5
21.17	13638.4
21.18	13637.4
21.19	13636.4
21.2	13635.5
21.21	13634.5
21.22	13633.5
21.23	13633.1
21.24	13633.2
21.25	13633.5
21.26	13633.5
21.27	13632.9
21.28	13631.4
21.29	13628.8
21.3	13625
21.31	13619.9
21.32	13613.5
21.33	13605.7
21.34	13596.7
21.35	13586.8
21.36	13576
21.37	13564.6
21.38	13553
21.39	13541.7
21.4	13530.9
21.41	13521.3
21.42	13512.5
21.43	13503.7
21.44	13495
21.45	13486.4
21.46	13477.8
21.47	13469.2
21.48	13460.7
21.49	13452.3
21.5	13443.9
21.51	13435.6
21.52	13427.3
21.53	13419.1
21.54	13410.9
21.55	13402.8
21.56	13394.7
21.57	13386.7
21.58	13378.7
21.59	13370.8
21.6	13362.9
21.61	13355.1
21.62	13347.3
21.63	13339.5
21.64	13331.9
21.65	13324.2
21.66	13316.6
21.67	13309
21.68	13301.5
21.69	13294
21.7	13286.5
21.71	13279.1
21.72	13271.7
21.73	13264.4
21.74	13257.1
21.75	13249.8
21.76	13242.6
21.77	13235.4
21.78	13228.2
21.79	13221.1
21.8	13214
21.81	13206.9
21.82	13199.8
21.83	13192.8
21.84	13185.8
21.85	13178.9
21.86	13172
21.87	13165
21.88	13158.2
21.89	13151.3
21.9	13144.5
21.91	13137.7
21.92	13130.9
21.93	13124.1
21.94	13117.4
21.95	13110.7
21.96	13104
21.97	13097.3
21.98	13090.7
21.99	13084
22	13077.4
22.01	13070.8
22.02	13064.2
22.03	13057.6
22.04	13051
22.05	13044.5
22.06	13038
22.07	13031.4
22.08	13024.9
22.09	13018.4
22.1	13011.9
22.11	13005.4
22.12	12998.9
22.13	12992.5
22.14	12986
22.15	12979.5
22.16	12973.1
22.17	12966.6
22.18	12960.2
22.19	12953.7
22.2	12947.3
22.21	12940.8
22.22	12934.4
22.23	12928
22.24	12921.5
22.25	12915.1
22.26	12908.6
22.27	12902.2
22.28	12895.7
22.29	12889.2
22.3	12882.8
22.31	12876.3
22.32	12869.8
22.33	12863.4
22.34	12856.9
22.35	12850.4
22.36	12843.8
22.37	12837.3
22.38	12830.8
22.39	12824.2
22.4	12817.7
22.41	12811.1
22.42	12804.5
22.43	12797.9
22.44	12791.3
22.45	12784.6
22.46	12778
22.47	12771.3
22.48	12764.6
22.49	12757.9
22.5	12751.2
22.51	12744.5
22.52	12737.7
22.53	12730.9
22.54	12724.1
22.55	12717.2
22.56	12710.4
22.57	12703.5
22.58	12696.5
22.59	12689.6
22.6	12682.6
22.61	12675.6
22.62	12668.6
22.63	12661.5
22.64	12654.4
22.65	12647.3
22.66	12640.2
22.67	12633
22.68	12625.8
22.69	12618.5
22.7	12611.2
22.71	12603.9
22.72	12596.5
22.73	12589.1
22.74	12581.7
22.75	12574.2
22.76	12566.7
22.77	12559.1
22.78	12551.5
22.79	12543.9
22.8	12536.2
22.81	12528.5
22.82	12520.7
22.83	12512.9
22.84	12505
22.85	12497.1
22.86	12489.2
22.87	12481.1
22.88	12473.1
22.89	12465
22.9	12456.9
22.91	12448.6
22.92	12440.4
22.93	12432.1
22.94	12423.7
22.95	12415.3
22.96	12406.9
22.97	12398.3
22.98	12389.8
22.99	12381.1
23	12372.4
23.01	12363.7
23.02	12354.9
23.03	12346
23.04	12337.1
23.05	12328.1
23.06	12319
23.07	12309.9
23.08	12300.8
23.09	12291.5
23.1	12282.2
23.11	12272.8
23.12	12263.4
23.13	12253.9
23.14	12244.3
23.15	12234.7
23.16	12225
23.17	12215.2
23.18	12205.3
23.19	12195.4
23.2	12185.4
23.21	12175.3
23.22	12165.2
23.23	12155
23.24	12144.7
23.25	12134.3
23.26	12123.9
23.27	12113.2
23.28	12102.2
23.29	12091.1
23.3	12079.9
23.31	12068.7
23.32	12057.7
23.33	12046.8
23.34	12036.2
23.35	12025.8
23.36	12015.7
23.37	12006
23.38	11996.5
23.39	11987.3
23.4	11978.4
23.41	11969.6
23.42	11960.9
23.43	11952.2
23.44	11943.4
23.45	11934.3
23.46	11925
23.47	11915.7
23.48	11906.3
23.49	11896.9
23.5	11887.5
23.51	11878
23.52	11868.5
23.53	11858.9
23.54	11849.4
23.55	11839.8
23.56	11830.1
23.57	11820.4
23.58	11810.7
23.59	11801
23.6	11791.2
23.61	11781.4
23.62	11771.6
23.63	11761.8
23.64	11751.9
23.65	11742
23.66	11732
23.67	11722
23.68	11712
23.69	11702
23.7	11692
23.71	11681.9
23.72	11671.8
23.73	11661.7
23.74	11651.5
23.75	11641.4
23.76	11631.2
23.77	11621
23.78	11610.7
23.79	11600.5
23.8	11590.2
23.81	11579.9
23.82	11569.6
23.83	11559.2
23.84	11548.9
23.85	11538.5
23.86	11528.1
23.87	11517.6
23.88	11507.2
23.89	11496.8
23.9	11486.3
23.91	11475.8
23.92	11465.3
23.93	11454.8
23.94	11444.2
23.95	11433.7
23.96	11423.1
23.97	11412.5
23.98	11402
23.99	11391.3
24	11380.7
24.01	11370.1
24.02	11359.5
24.03	11348.8
24.04	11338.1
24.05	11327.5
24.06	11316.8
24.07	11306.1
24.08	11295.4
24.09	11284.7
24.1	11274
24.11	11263.2
24.12	11252.5
24.13	11241.8
24.14	11231
24.15	11220.3
24.16	11209.5
24.17	11198.8
24.18	11188
24.19	11177.2
24.2	11166.5
24.21	11155.7
24.22	11144.9
24.23	11134.1
24.24	11123.3
24.25	11112.5
24.26	11101.8
24.27	11091
24.28	11080.2
24.29	11069.4
24.3	11058.6
24.31	11047.9
24.32	11037.1
24.33	11026.3
24.34	11015.5
24.35	11004.8
24.36	10994
24.37	10983.2
24.38	10972.5
24.39	10961.7
24.4	10951
24.41	10940.2
24.42	10929.5
24.43	10918.8
24.44	10908
24.45	10897.3
24.46	10886.6
24.47	10875.9
24.48	10865.2
24.49	10854.6
24.5	10843.9
24.51	10833.2
24.52	10822.6
24.53	10812
24.54	10801.3
24.55	10790.7
24.56	10780.1
24.57	10769.5
24.58	10759
24.59	10748.4
24.6	10737.9
24.61	10727.3
24.62	10716.8
24.63	10706.3
24.64	10695.8
24.65	10685.4
24.66	10674.9
24.67	10664.5
24.68	10654.1
24.69	10643.7
24.7	10633.3
24.71	10623
24.72	10612.6
24.73	10602.3
24.74	10592
24.75	10581.8
24.76	10571.5
24.77	10561.3
24.78	10551.1
24.79	10540.9
24.8	10530.7
24.81	10520.6
24.82	10510.5
24.83	10500.4
24.84	10490.4
24.85	10480.3
24.86	10470.3
24.87	10460.3
24.88	10450.4
24.89	10440.5
24.9	10430.5
24.91	10420.7
24.92	10410.8
24.93	10401
24.94	10391.2
24.95	10381.5
24.96	10371.8
24.97	10362.1
[truncated: 2,503 more rows]

## Sheet: LaEC
Sampel LaEC
2θ - °	Intensity - cps
5	5386.53
5.01	5382.3
5.02	5378.27
5.03	5374.46
5.04	5370.85
5.05	5367.44
5.06	5364.24
5.07	5361.25
5.08	5358.46
5.09	5355.86
5.1	5353.48
5.11	5351.28
5.12	5349.29
5.13	5347.49
5.14	5345.89
5.15	5344.49
5.16	5343.27
5.17	5342.25
5.18	5341.42
5.19	5340.79
5.2	5340.34
5.21	5340.07
5.22	5340
5.23	5340.11
5.24	5340.41
5.25	5340.89
5.26	5341.55
5.27	5342.39
5.28	5343.41
5.29	5344.61
5.3	5345.99
5.31	5347.55
5.32	5349.28
5.33	5351.18
5.34	5353.26
5.35	5355.51
5.36	5357.94
5.37	5360.53
5.38	5363.29
5.39	5366.22
5.4	5369.31
5.41	5372.57
5.42	5376
5.43	5379.58
5.44	5383.33
5.45	5387.24
5.46	5391.31
5.47	5395.54
5.48	5399.93
5.49	5404.47
5.5	5409.17
5.51	5414.02
5.52	5419.02
5.53	5424.18
5.54	5429.49
5.55	5434.94
5.56	5440.55
5.57	5446.3
5.58	5452.2
5.59	5458.24
5.6	5464.43
5.61	5470.76
5.62	5477.23
5.63	5483.85
5.64	5490.6
5.65	5497.49
5.66	5504.52
5.67	5511.68
5.68	5518.98
5.69	5526.41
5.7	5533.97
5.71	5541.67
5.72	5549.49
5.73	5557.45
5.74	5565.53
5.75	5573.74
5.76	5582.08
5.77	5590.54
5.78	5599.13
5.79	5607.84
5.8	5616.66
5.81	5625.61
5.82	5634.68
5.83	5643.87
5.84	5653.17
5.85	5662.59
5.86	5672.12
5.87	5681.77
5.88	5691.53
5.89	5701.4
5.9	5711.38
5.91	5721.47
5.92	5731.66
5.93	5741.97
5.94	5752.38
5.95	5762.89
5.96	5773.51
5.97	5784.23
5.98	5795.04
5.99	5805.96
6	5816.98
6.01	5828.1
6.02	5839.31
6.03	5850.62
6.04	5862.02
6.05	5873.52
6.06	5885.1
6.07	5896.78
6.08	5908.55
6.09	5920.41
6.1	5932.35
6.11	5944.38
6.12	5956.5
6.13	5968.7
6.14	5980.98
6.15	5993.35
6.16	6005.79
6.17	6018.32
6.18	6030.92
6.19	6043.6
6.2	6056.36
6.21	6069.19
6.22	6082.1
6.23	6095.07
6.24	6108.12
6.25	6121.24
6.26	6134.44
6.27	6147.69
6.28	6161.02
6.29	6174.41
6.3	6187.87
6.31	6201.39
6.32	6214.97
6.33	6228.62
6.34	6242.32
6.35	6256.09
6.36	6269.91
6.37	6283.79
6.38	6297.72
6.39	6311.71
6.4	6325.76
6.41	6339.85
6.42	6354
6.43	6368.2
6.44	6382.45
6.45	6396.74
6.46	6411.08
6.47	6425.47
6.48	6439.9
6.49	6454.38
6.5	6468.9
6.51	6483.45
6.52	6498.05
6.53	6512.69
6.54	6527.37
6.55	6542.08
6.56	6556.83
6.57	6571.61
6.58	6586.43
6.59	6601.28
6.6	6616.15
6.61	6631.06
6.62	6646
6.63	6660.97
6.64	6675.96
6.65	6690.98
6.66	6706.02
6.67	6721.08
6.68	6736.17
6.69	6751.28
6.7	6766.4
6.71	6781.55
6.72	6796.72
6.73	6811.9
6.74	6827.09
6.75	6842.3
6.76	6857.52
6.77	6872.76
6.78	6888
6.79	6903.26
6.8	6918.52
6.81	6933.79
6.82	6949.07
6.83	6964.35
6.84	6979.63
6.85	6994.92
6.86	7010.21
6.87	7025.5
6.88	7040.79
6.89	7056.08
6.9	7071.37
6.91	7086.65
6.92	7101.93
6.93	7117.2
6.94	7132.46
6.95	7147.65
6.96	7162.92
6.97	7178.55
6.98	7194.72
6.99	7211.53
7	7228.99
7.01	7247.07
7.02	7265.69
7.03	7284.71
7.04	7303.97
7.05	7323.28
7.06	7342.45
7.07	7361.27
7.08	7379.56
7.09	7397.11
7.1	7413.78
7.11	7429.44
7.12	7443.99
7.13	7457.39
7.14	7469.96
7.15	7482.02
7.16	7493.58
7.17	7504.63
7.18	7515.19
7.19	7525.25
7.2	7534.83
7.21	7543.92
7.22	7552.53
7.23	7560.66
7.24	7568.32
7.25	7575.52
7.26	7582.25
7.27	7588.52
7.28	7594.34
7.29	7599.7
7.3	7604.62
7.31	7609.1
7.32	7613.14
7.33	7616.74
7.34	7619.91
7.35	7622.66
7.36	7624.99
7.37	7626.9
7.38	7628.39
7.39	7629.48
7.4	7630.16
7.41	7630.44
7.42	7630.33
7.43	7629.82
7.44	7628.93
7.45	7627.65
7.46	7625.99
7.47	7623.95
7.48	7621.55
7.49	7618.77
7.5	7615.64
7.51	7612.14
7.52	7608.3
7.53	7604.1
7.54	7599.55
7.55	7594.66
7.56	7589.44
7.57	7583.88
7.58	7577.99
7.59	7571.78
7.6	7565.25
7.61	7558.4
7.62	7551.23
7.63	7543.76
7.64	7535.98
7.65	7527.91
7.66	7519.54
7.67	7510.88
7.68	7501.92
7.69	7492.69
7.7	7483.18
7.71	7473.39
7.72	7463.33
7.73	7453.01
7.74	7442.42
7.75	7431.58
7.76	7420.48
7.77	7409.13
7.78	7397.53
7.79	7385.7
7.8	7373.63
7.81	7361.32
7.82	7348.79
7.83	7336.03
7.84	7323.05
7.85	7309.85
7.86	7296.45
7.87	7282.83
7.88	7269.02
7.89	7255
7.9	7240.78
7.91	7226.38
7.92	7211.79
7.93	7197.02
7.94	7182.07
7.95	7166.94
7.96	7151.65
7.97	7136.18
7.98	7120.56
7.99	7104.78
8	7088.85
8.01	7072.76
8.02	7056.53
8.03	7040.17
8.04	7023.66
8.05	7007.02
8.06	6990.26
8.07	6973.37
8.08	6956.36
8.09	6939.24
8.1	6922
8.11	6904.66
8.12	6887.21
8.13	6869.67
8.14	6852.03
8.15	6834.3
8.16	6816.49
8.17	6798.59
8.18	6780.61
8.19	6762.57
8.2	6744.45
8.21	6726.27
8.22	6708.02
8.23	6689.72
8.24	6671.37
8.25	6652.97
8.26	6634.52
8.27	6616.03
8.28	6597.51
8.29	6578.96
8.3	6560.38
8.31	6541.77
8.32	6523.15
8.33	6504.51
8.34	6485.86
8.35	6467.21
8.36	6448.55
8.37	6429.89
8.38	6411.24
8.39	6392.6
8.4	6373.98
8.41	6355.37
8.42	6336.79
8.43	6318.23
8.44	6299.71
8.45	6281.22
8.46	6262.77
8.47	6244.36
8.48	6226
8.49	6207.7
8.5	6189.45
8.51	6171.26
8.52	6153.14
8.53	6135.08
8.54	6117.1
8.55	6099.2
8.56	6081.37
8.57	6063.64
8.58	6045.99
8.59	6028.44
8.6	6010.98
8.61	5993.63
8.62	5976.38
8.63	5959.25
8.64	5942.23
8.65	5925.33
8.66	5908.55
8.67	5891.9
8.68	5875.39
8.69	5859.01
8.7	5842.77
8.71	5826.67
8.72	5810.72
8.73	5794.93
8.74	5779.29
8.75	5763.81
8.76	5748.51
8.77	5733.36
8.78	5718.4
8.79	5703.61
8.8	5689
8.81	5674.58
8.82	5660.35
8.83	5646.31
8.84	5632.48
8.85	5618.85
8.86	5605.42
8.87	5592.2
8.88	5579.21
8.89	5566.43
8.9	5553.87
8.91	5541.55
8.92	5529.45
8.93	5517.6
8.94	5505.98
8.95	5494.61
8.96	5483.49
8.97	5472.62
8.98	5462.01
8.99	5451.88
9	5442.31
9.01	5433.11
9.02	5424.11
9.03	5415.12
9.04	5406.01
9.05	5396.63
9.06	5386.87
9.07	5376.64
9.08	5365.89
9.09	5354.58
9.1	5342.7
9.11	5330.31
9.12	5317.49
9.13	5304.35
9.14	5291.07
9.15	5277.88
9.16	5265.06
9.17	5252.97
9.18	5241.42
9.19	5229.98
9.2	5218.63
9.21	5207.39
9.22	5196.24
9.23	5185.19
9.24	5174.24
9.25	5163.39
9.26	5152.64
9.27	5141.98
9.28	5131.42
9.29	5120.96
9.3	5110.59
9.31	5100.31
9.32	5090.13
9.33	5080.05
9.34	5070.05
9.35	5060.15
9.36	5050.34
9.37	5040.63
9.38	5031
9.39	5021.47
9.4	5012.02
9.41	5002.66
9.42	4993.4
9.43	4984.22
9.44	4975.13
9.45	4966.12
9.46	4957.21
9.47	4948.38
9.48	4939.64
9.49	4930.98
9.5	4922.4
9.51	4913.91
9.52	4905.51
9.53	4897.19
9.54	4888.95
9.55	4880.79
9.56	4872.71
9.57	4864.72
9.58	4856.81
9.59	4848.97
9.6	4841.22
9.61	4833.54
9.62	4825.94
9.63	4818.43
9.64	4810.98
9.65	4803.62
9.66	4796.33
9.67	4789.12
9.68	4781.98
9.69	4774.92
9.7	4767.94
9.71	4761.02
9.72	4754.18
9.73	4747.41
9.74	4740.72
9.75	4734.1
9.76	4727.54
9.77	4721.06
9.78	4714.65
9.79	4708.31
9.8	4702.04
9.81	4695.83
9.82	4689.7
9.83	4683.63
9.84	4677.63
9.85	4671.69
9.86	4665.82
9.87	4660.02
9.88	4654.28
9.89	4648.61
9.9	4643
9.91	4637.45
9.92	4631.97
9.93	4626.55
9.94	4621.19
9.95	4615.89
9.96	4610.65
9.97	4605.47
9.98	4600.36
9.99	4595.3
10	4590.3
10.01	4585.35
10.02	4580.47
10.03	4575.65
10.04	4570.87
10.05	4566.16
10.06	4561.5
10.07	4556.9
10.08	4552.35
10.09	4547.85
10.1	4543.41
10.11	4539.02
10.12	4534.68
10.13	4530.4
10.14	4526.17
10.15	4521.98
10.16	4517.85
10.17	4513.77
10.18	4509.73
10.19	4505.75
10.2	4501.81
10.21	4497.92
10.22	4494.08
10.23	4490.29
10.24	4486.54
10.25	4482.84
10.26	4479.18
10.27	4475.56
10.28	4471.99
10.29	4468.47
10.3	4464.98
10.31	4461.54
10.32	4458.14
10.33	4454.79
10.34	4451.47
10.35	4448.19
10.36	4444.96
10.37	4441.76
10.38	4438.6
10.39	4435.48
10.4	4432.4
10.41	4429.35
10.42	4426.35
10.43	4423.37
10.44	4420.44
10.45	4417.53
10.46	4414.67
10.47	4411.84
10.48	4409.04
10.49	4406.27
10.5	4403.54
10.51	4400.83
10.52	4398.16
10.53	4395.52
10.54	4392.92
10.55	4390.34
10.56	4387.79
10.57	4385.27
10.58	4382.77
10.59	4380.31
10.6	4377.87
10.61	4375.46
10.62	4373.08
10.63	4370.72
10.64	4368.39
10.65	4366.08
10.66	4363.79
10.67	4361.53
10.68	4359.29
10.69	4357.08
10.7	4354.88
10.71	4352.71
10.72	4350.56
10.73	4348.43
10.74	4346.32
10.75	4344.23
10.76	4342.16
10.77	4340.1
10.78	4338.07
10.79	4336.05
10.8	4334.05
10.81	4332.06
10.82	4330.09
10.83	4328.14
10.84	4326.2
10.85	4324.27
10.86	4322.36
10.87	4320.46
10.88	4318.58
10.89	4316.7
10.9	4314.84
10.91	4312.99
10.92	4311.15
10.93	4309.32
10.94	4307.5
10.95	4305.69
10.96	4303.88
10.97	4302.09
10.98	4300.3
10.99	4298.52
11	4296.74
11.01	4294.97
11.02	4293.21
11.03	4291.19
11.04	4288.73
11.05	4285.99
11.06	4283.06
11.07	4280.07
11.08	4277.11
11.09	4274.25
11.1	4271.56
11.11	4269.12
11.12	4266.94
11.13	4265.07
11.14	4263.53
11.15	4262.32
11.16	4261.44
11.17	4260.85
11.18	4260.53
11.19	4260.44
11.2	4260.5
11.21	4260.65
11.22	4260.81
11.23	4260.97
11.24	4261.15
11.25	4261.33
11.26	4261.51
11.27	4261.7
11.28	4261.9
11.29	4262.1
11.3	4262.31
11.31	4262.53
11.32	4262.76
11.33	4262.99
11.34	4263.23
11.35	4263.48
11.36	4263.73
11.37	4264
11.38	4264.27
11.39	4264.55
11.4	4264.84
11.41	4265.13
11.42	4265.44
11.43	4265.75
11.44	4266.07
11.45	4266.4
11.46	4266.74
11.47	4267.1
11.48	4267.45
11.49	4267.82
11.5	4268.2
11.51	4268.59
11.52	4268.99
11.53	4269.4
11.54	4269.82
11.55	4270.26
11.56	4270.7
11.57	4271.15
11.58	4271.61
11.59	4272.09
11.6	4272.58
11.61	4273.07
11.62	4273.59
11.63	4274.11
11.64	4274.64
11.65	4275.19
11.66	4275.75
11.67	4276.32
11.68	4276.9
11.69	4277.5
11.7	4278.11
11.71	4278.73
11.72	4279.37
11.73	4280.02
11.74	4280.68
11.75	4281.36
11.76	4282.05
11.77	4282.75
11.78	4283.47
11.79	4284.21
11.8	4284.96
11.81	4285.72
11.82	4286.5
11.83	4287.29
11.84	4288.1
11.85	4288.92
11.86	4289.76
11.87	4290.61
11.88	4291.48
11.89	4292.37
11.9	4293.27
11.91	4294.19
11.92	4295.13
11.93	4296.08
11.94	4297.05
11.95	4298.03
11.96	4299.03
11.97	4300.05
11.98	4301.09
11.99	4302.15
12	4303.22
12.01	4304.31
12.02	4305.41
12.03	4306.54
12.04	4307.68
12.05	4308.85
12.06	4310.03
12.07	4311.23
12.08	4312.44
12.09	4313.68
12.1	4314.94
12.11	4316.22
12.12	4317.51
12.13	4318.83
12.14	4320.16
12.15	4321.52
12.16	4322.89
12.17	4324.29
12.18	4325.7
12.19	4327.14
12.2	4328.6
12.21	4330.08
12.22	4331.58
12.23	4333.1
12.24	4334.64
12.25	4336.2
12.26	4337.79
12.27	4339.4
12.28	4341.03
12.29	4342.68
12.3	4344.35
12.31	4346.05
12.32	4347.77
12.33	4349.51
12.34	4351.27
12.35	4353.06
12.36	4354.87
12.37	4356.7
12.38	4358.56
12.39	4360.44
12.4	4362.35
12.41	4364.28
12.42	4366.23
12.43	4368.21
12.44	4370.21
12.45	4372.24
12.46	4374.29
12.47	4376.37
12.48	4378.47
12.49	4380.6
12.5	4382.75
12.51	4384.93
12.52	4387.13
12.53	4389.36
12.54	4391.62
12.55	4393.9
12.56	4396.21
12.57	4398.54
12.58	4400.9
12.59	4403.29
12.6	4405.71
12.61	4408.15
12.62	4410.62
12.63	4413.11
12.64	4415.64
12.65	4418.19
12.66	4420.77
12.67	4423.38
12.68	4426.02
12.69	4428.68
12.7	4431.38
12.71	4434.1
12.72	4436.85
12.73	4439.63
12.74	4442.44
12.75	4445.28
12.76	4448.15
12.77	4451.04
12.78	4453.97
12.79	4456.93
12.8	4459.91
12.81	4462.93
12.82	4465.98
12.83	4469.06
12.84	4472.17
12.85	4475.31
12.86	4478.48
12.87	4481.68
12.88	4484.91
12.89	4488.18
12.9	4491.48
12.91	4494.8
12.92	4498.16
12.93	4501.56
12.94	4504.98
12.95	4508.44
12.96	4511.93
12.97	4515.45
12.98	4519.01
12.99	4522.59
13	4526.22
13.01	4529.87
13.02	4533.56
13.03	4537.28
13.04	4541.04
13.05	4544.83
13.06	4548.65
13.07	4552.5
13.08	4556.31
13.09	4559.99
13.1	4563.5
13.11	4566.77
13.12	4569.78
13.13	4572.52
13.14	4574.96
13.15	4577.12
13.16	4579.03
13.17	4580.73
13.18	4582.24
13.19	4583.64
13.2	4585
13.21	4586.4
13.22	4587.92
13.23	4589.69
13.24	4591.8
13.25	4594.39
13.26	4597.28
13.27	4600.23
13.28	4603.23
13.29	4606.28
13.3	4609.39
13.31	4612.54
13.32	4615.74
13.33	4618.99
13.34	4622.29
13.35	4625.64
13.36	4629.03
13.37	4632.48
13.38	4635.97
13.39	4639.51
13.4	4643.09
13.41	4646.72
13.42	4650.4
13.43	4654.12
13.44	4657.89
13.45	4661.7
13.46	4665.56
13.47	4669.46
13.48	4673.41
13.49	4677.39
13.5	4681.43
13.51	4685.5
13.52	4689.61
13.53	4693.77
13.54	4697.97
13.55	4702.21
13.56	4706.49
13.57	4710.81
13.58	4715.17
13.59	4719.57
13.6	4724.01
13.61	4728.48
13.62	4733
13.63	4737.55
13.64	4742.14
13.65	4746.77
13.66	4751.43
13.67	4756.13
13.68	4760.87
13.69	4765.64
13.7	4770.45
13.71	4775.29
13.72	4780.17
13.73	4785.08
13.74	4790.02
13.75	4795
13.76	4800.01
13.77	4805.06
13.78	4810.13
13.79	4815.24
13.8	4820.38
13.81	4825.55
13.82	4830.74
13.83	4835.98
13.84	4841.24
13.85	4846.52
13.86	4851.84
13.87	4857.19
13.88	4862.57
13.89	4867.97
13.9	4873.4
13.91	4878.86
13.92	4884.35
13.93	4889.86
13.94	4895.4
13.95	4900.96
13.96	4906.55
13.97	4912.16
13.98	4917.8
13.99	4923.46
14	4929.15
14.01	4934.86
14.02	4940.59
14.03	4946.34
14.04	4952.12
14.05	4957.92
14.06	4963.74
14.07	4969.58
14.08	4975.44
14.09	4981.33
14.1	4987.23
14.11	4993.15
14.12	4999.09
14.13	5005.05
14.14	5011.03
14.15	5017.03
14.16	5023.04
14.17	5029.07
14.18	5035.12
14.19	5041.19
14.2	5047.27
14.21	5053.36
14.22	5059.47
14.23	5065.6
14.24	5071.74
14.25	5077.9
14.26	5084.07
14.27	5090.25
14.28	5096.44
14.29	5102.65
14.3	5108.88
14.31	5115.11
14.32	5121.35
14.33	5127.61
14.34	5133.87
14.35	5140.15
14.36	5146.44
14.37	5152.73
14.38	5159.04
14.39	5165.35
14.4	5171.67
14.41	5178.01
14.42	5184.34
14.43	5190.69
14.44	5197.04
14.45	5203.4
14.46	5209.77
14.47	5216.14
14.48	5222.51
14.49	5228.9
14.5	5235.28
14.51	5241.67
14.52	5248.07
14.53	5254.47
14.54	5260.87
14.55	5267.27
14.56	5273.68
14.57	5280.09
14.58	5286.49
14.59	5292.91
14.6	5299.32
14.61	5305.73
14.62	5312.14
14.63	5318.55
14.64	5324.97
14.65	5331.38
14.66	5337.78
14.67	5344.19
14.68	5350.6
14.69	5357
14.7	5363.4
14.71	5369.79
14.72	5376.19
14.73	5382.57
14.74	5388.96
14.75	5395.34
14.76	5401.71
14.77	5408.08
14.78	5414.44
14.79	5420.79
14.8	5427.14
14.81	5433.48
14.82	5439.81
14.83	5446.14
14.84	5452.46
14.85	5458.77
14.86	5465.06
14.87	5471.35
14.88	5477.64
14.89	5483.9
14.9	5490.16
14.91	5496.41
14.92	5502.65
14.93	5508.87
14.94	5515.09
14.95	5521.29
14.96	5527.48
14.97	5533.65
14.98	5539.81
14.99	5545.95
15	5552.09
15.01	5558.2
15.02	5564.31
15.03	5570.39
15.04	5576.46
15.05	5582.52
15.06	5588.55
15.07	5594.57
15.08	5600.58
15.09	5606.56
15.1	5612.53
15.11	5618.5
15.12	5624.56
15.13	5630.82
15.14	5637.35
15.15	5644.22
15.16	5651.47
15.17	5659.14
15.18	5667.24
15.19	5675.77
15.2	5684.71
15.21	5694.02
15.22	5703.64
15.23	5713.5
15.24	5723.52
15.25	5733.57
15.26	5743.52
15.27	5753.23
15.28	5762.53
15.29	5771.21
15.3	5779.52
15.31	5787.83
15.32	5796.14
15.33	5804.45
15.34	5812.76
15.35	5821.07
15.36	5829.38
15.37	5837.68
15.38	5845.99
15.39	5854.3
15.4	5862.61
15.41	5870.93
15.42	5879.24
15.43	5887.56
15.44	5895.88
15.45	5904.2
15.46	5912.52
15.47	5920.85
15.48	5929.18
15.49	5937.52
15.5	5945.85
15.51	5954.2
15.52	5962.54
15.53	5970.89
15.54	5979.25
15.55	5987.61
15.56	5995.98
15.57	6004.35
15.58	6012.73
15.59	6021.11
15.6	6029.51
15.61	6037.9
15.62	6046.31
15.63	6054.72
15.64	6063.14
15.65	6071.57
15.66	6080.01
15.67	6088.45
15.68	6096.9
15.69	6105.37
15.7	6113.84
15.71	6122.32
15.72	6130.81
15.73	6139.31
15.74	6147.82
15.75	6156.34
15.76	6164.87
15.77	6173.41
15.78	6181.97
15.79	6190.53
15.8	6199.11
15.81	6207.7
15.82	6216.3
15.83	6224.92
15.84	6233.54
15.85	6242.18
15.86	6250.84
15.87	6259.5
15.88	6268.19
15.89	6276.88
15.9	6285.59
15.91	6294.31
15.92	6303.05
15.93	6311.81
15.94	6320.58
15.95	6329.36
15.96	6338.16
15.97	6346.98
15.98	6355.82
15.99	6364.67
16	6373.54
16.01	6382.42
16.02	6391.33
16.03	6400.25
16.04	6409.19
16.05	6418.14
16.06	6427.12
16.07	6436.12
16.08	6445.13
16.09	6454.16
16.1	6463.22
16.11	6472.29
16.12	6481.38
16.13	6490.5
16.14	6499.63
16.15	6508.79
16.16	6517.97
16.17	6527.16
16.18	6536.39
16.19	6545.63
16.2	6554.89
16.21	6564.18
16.22	6573.49
16.23	6582.82
16.24	6592.18
16.25	6601.56
16.26	6610.97
16.27	6620.4
16.28	6629.85
16.29	6639.33
16.3	6648.83
16.31	6658.36
16.32	6667.91
16.33	6677.49
16.34	6687.1
16.35	6696.73
16.36	6706.39
16.37	6716.07
16.38	6725.78
16.39	6735.52
16.4	6745.29
16.41	6755.09
16.42	6764.91
16.43	6774.76
16.44	6784.64
16.45	6794.55
16.46	6804.49
16.47	6814.45
16.48	6824.45
16.49	6834.48
16.5	6844.54
16.51	6854.62
16.52	6864.74
16.53	6874.9
16.54	6885.08
16.55	6895.29
16.56	6905.53
16.57	6915.81
16.58	6926.12
16.59	6936.46
16.6	6946.84
16.61	6957.24
16.62	6967.69
16.63	6978.16
16.64	6988.67
16.65	6999.21
16.66	7009.79
16.67	7020.4
16.68	7031.05
16.69	7041.73
16.7	7052.45
16.71	7063.2
16.72	7073.99
16.73	7084.82
16.74	7095.68
16.75	7106.58
16.76	7117.52
16.77	7128.49
16.78	7139.51
16.79	7150.55
16.8	7161.64
16.81	7172.77
16.82	7183.93
16.83	7195.14
16.84	7206.38
16.85	7217.66
16.86	7228.98
16.87	7240.35
16.88	7251.75
16.89	7263.19
16.9	7274.68
16.91	7286.2
16.92	7297.77
16.93	7309.38
16.94	7321.02
16.95	7332.72
16.96	7344.45
16.97	7356.23
16.98	7368.05
16.99	7379.91
17	7391.82
17.01	7403.77
17.02	7415.76
17.03	7427.8
17.04	7439.88
17.05	7452.01
17.06	7464.18
17.07	7476.4
17.08	7488.66
17.09	7500.97
17.1	7513.33
17.11	7525.73
17.12	7538.18
17.13	7550.67
17.14	7563.21
17.15	7575.46
17.16	7587.13
17.17	7598.3
17.18	7609.04
17.19	7619.41
17.2	7629.46
17.21	7639.26
17.22	7648.84
17.23	7658.25
17.24	7667.55
17.25	7676.79
17.26	7686.02
17.27	7695.31
17.28	7704.74
17.29	7714.38
17.3	7724.34
17.31	7734.71
17.32	7745.62
17.33	7757.22
17.34	7769.18
17.35	7781.1
17.36	7792.97
17.37	7804.79
17.38	7816.56
17.39	7828.29
17.4	7839.97
17.41	7851.6
17.42	7863.19
17.43	7874.73
17.44	7886.22
17.45	7897.67
17.46	7909.07
17.47	7920.43
17.48	7931.74
17.49	7943.02
17.5	7954.24
17.51	7965.42
17.52	7976.56
17.53	7987.66
17.54	7998.71
17.55	8009.72
17.56	8020.69
17.57	8031.62
17.58	8042.51
17.59	8053.35
17.6	8064.16
17.61	8074.92
17.62	8085.64
17.63	8096.33
17.64	8106.97
17.65	8117.58
17.66	8128.14
17.67	8138.67
17.68	8149.16
17.69	8159.61
17.7	8170.02
17.71	8180.4
17.72	8190.74
17.73	8201.04
17.74	8211.31
17.75	8221.54
17.76	8231.73
17.77	8241.89
17.78	8252.01
17.79	8262.1
17.8	8272.16
17.81	8282.18
17.82	8292.16
17.83	8302.11
17.84	8312.03
17.85	8321.92
17.86	8331.77
17.87	8341.59
17.88	8351.38
17.89	8361.14
17.9	8370.86
17.91	8380.56
17.92	8390.22
17.93	8399.86
17.94	8409.46
17.95	8419.03
17.96	8428.58
17.97	8438.09
17.98	8447.58
17.99	8457.03
18	8466.46
18.01	8475.86
18.02	8485.24
18.03	8494.58
18.04	8503.9
18.05	8513.19
18.06	8522.46
18.07	8531.7
18.08	8540.91
18.09	8550.1
18.1	8559.26
18.11	8568.4
18.12	8577.51
18.13	8586.6
18.14	8595.67
18.15	8604.71
18.16	8613.73
18.17	8622.72
18.18	8631.7
18.19	8640.65
18.2	8649.57
18.21	8658.48
18.22	8667.36
18.23	8676.23
18.24	8685.07
18.25	8693.9
18.26	8702.7
18.27	8711.48
18.28	8720.24
18.29	8728.99
18.3	8737.71
18.31	8746.42
18.32	8755.1
18.33	8763.77
18.34	8772.43
18.35	8781.06
18.36	8789.68
18.37	8798.28
18.38	8806.86
18.39	8815.43
18.4	8823.98
18.41	8832.52
18.42	8841.04
18.43	8849.55
18.44	8858.04
18.45	8866.52
18.46	8874.98
18.47	8883.43
18.48	8891.87
18.49	8900.3
18.5	8908.71
18.51	8917.1
18.52	8925.49
18.53	8933.87
18.54	8942.23
18.55	8950.58
18.56	8958.92
18.57	8967.25
18.58	8975.58
18.59	8983.89
18.6	8992.19
18.61	9000.48
18.62	9008.76
18.63	9017.04
18.64	9025.3
18.65	9033.56
18.66	9041.81
18.67	9050.06
18.68	9058.29
18.69	9066.52
18.7	9074.74
18.71	9082.96
18.72	9091.17
18.73	9099.38
18.74	9107.58
18.75	9115.77
18.76	9123.96
18.77	9132.15
18.78	9140.33
18.79	9148.51
18.8	9156.68
18.81	9164.85
18.82	9173.02
18.83	9181.19
18.84	9189.36
18.85	9197.52
18.86	9205.68
18.87	9213.84
18.88	9222
18.89	9230.16
18.9	9238.32
18.91	9246.48
18.92	9254.64
18.93	9262.8
18.94	9270.96
18.95	9279.12
18.96	9287.28
18.97	9295.45
18.98	9303.62
18.99	9311.79
19	9319.96
19.01	9328.14
19.02	9336.32
19.03	9344.5
19.04	9352.69
19.05	9360.89
19.06	9369.08
19.07	9377.29
19.08	9385.49
19.09	9393.71
19.1	9401.93
19.11	9410.15
19.12	9418.39
19.13	9426.63
19.14	9434.87
19.15	9443.13
19.16	9451.39
19.17	9459.66
19.18	9467.94
19.19	9477.27
19.2	9488.32
19.21	9500.56
19.22	9513.53
19.23	9526.79
19.24	9539.97
19.25	9552.71
19.26	9564.76
19.27	9575.86
19.28	9585.85
19.29	9594.58
19.3	9601.99
19.31	9608.05
19.32	9612.78
19.33	9616.29
19.34	9618.7
19.35	9620.23
19.36	9621.12
19.37	9621.71
19.38	9622.23
19.39	9622.73
19.4	9623.19
19.41	9623.61
19.42	9624.01
19.43	9624.37
19.44	9624.7
19.45	9624.99
19.46	9625.26
19.47	9625.49
19.48	9625.69
19.49	9625.85
19.5	9625.99
19.51	9626.1
19.52	9626.17
19.53	9626.22
19.54	9626.23
19.55	9626.22
19.56	9626.18
19.57	9626.1
19.58	9626
19.59	9625.87
19.6	9625.71
19.61	9625.52
19.62	9625.31
19.63	9625.07
19.64	9624.8
19.65	9624.5
19.66	9624.18
19.67	9623.83
19.68	9623.45
19.69	9623.05
19.7	9622.62
19.71	9622.17
19.72	9621.69
19.73	9621.19
19.74	9620.66
19.75	9620.11
19.76	9619.53
19.77	9618.93
19.78	9618.31
19.79	9617.66
19.8	9617
19.81	9616.3
19.82	9615.59
19.83	9614.85
19.84	9614.09
19.85	9613.32
19.86	9612.51
19.87	9611.69
19.88	9610.85
19.89	9609.99
19.9	9609.1
19.91	9608.2
19.92	9607.28
19.93	9606.34
19.94	9605.38
19.95	9604.4
19.96	9603.4
19.97	9602.38
19.98	9601.35
19.99	9600.29
20	9599.22
20.01	9598.14
20.02	9597.03
20.03	9595.91
20.04	9594.77
20.05	9593.62
20.06	9592.45
20.07	9591.27
20.08	9590.07
20.09	9588.85
20.1	9587.62
20.11	9586.38
20.12	9585.12
20.13	9583.85
20.14	9582.56
20.15	9581.27
20.16	9579.95
20.17	9578.63
20.18	9577.29
20.19	9575.94
20.2	9574.58
20.21	9573.21
20.22	9571.82
20.23	9570.43
20.24	9569.02
20.25	9567.6
20.26	9566.17
20.27	9564.74
20.28	9563.29
20.29	9561.83
20.3	9560.36
20.31	9558.89
20.32	9557.41
20.33	9555.91
20.34	9554.41
20.35	9552.9
20.36	9551.39
20.37	9549.86
20.38	9548.33
20.39	9546.8
20.4	9545.25
20.41	9543.7
20.42	9542.15
20.43	9540.58
20.44	9539.01
20.45	9537.44
20.46	9535.86
20.47	9534.28
20.48	9532.7
20.49	9531.1
20.5	9529.51
20.51	9527.91
20.52	9526.31
20.53	9524.71
20.54	9523.1
20.55	9521.49
20.56	9519.88
20.57	9518.27
20.58	9516.65
20.59	9515.04
20.6	9513.42
20.61	9511.8
20.62	9510.18
20.63	9508.56
20.64	9506.94
20.65	9505.33
20.66	9503.71
20.67	9502.09
20.68	9500.48
20.69	9498.86
20.7	9497.25
20.71	9495.64
20.72	9494.03
20.73	9492.42
20.74	9490.82
20.75	9489.22
20.76	9487.62
20.77	9486.03
20.78	9484.44
20.79	9482.85
20.8	9481.27
20.81	9479.69
20.82	9478.12
20.83	9476.56
20.84	9474.99
20.85	9473.44
20.86	9471.89
20.87	9470.35
20.88	9468.81
20.89	9467.28
20.9	9465.76
20.91	9464.24
20.92	9462.74
20.93	9461.24
20.94	9459.75
20.95	9458.26
20.96	9456.79
20.97	9455.32
20.98	9453.87
20.99	9452.42
21	9450.99
21.01	9449.56
21.02	9448.15
21.03	9446.74
21.04	9445.35
21.05	9443.96
21.06	9442.59
21.07	9441.23
21.08	9439.89
21.09	9438.55
21.1	9437.23
21.11	9435.92
21.12	9434.62
21.13	9433.34
21.14	9432.07
21.15	9430.81
21.16	9429.57
21.17	9428.34
21.18	9427.13
21.19	9425.94
21.2	9424.75
21.21	9423.59
21.22	9422.44
21.23	9421.82
21.24	9421.97
21.25	9422.54
21.26	9423.19
21.27	9423.66
21.28	9423.7
21.29	9423.12
21.3	9421.78
21.31	9419.58
21.32	9416.44
21.33	9412.35
21.34	9407.33
21.35	9401.45
21.36	9394.83
21.37	9387.6
21.38	9379.97
21.39	9372.17
21.4	9364.48
21.41	9357.23
21.42	9350.32
21.43	9343.44
21.44	9336.58
21.45	9329.74
21.46	9322.92
21.47	9316.13
21.48	9309.35
21.49	9302.6
21.5	9295.87
21.51	9289.15
21.52	9282.46
21.53	9275.79
21.54	9269.15
21.55	9262.52
21.56	9255.91
21.57	9249.32
21.58	9242.76
21.59	9236.21
21.6	9229.69
21.61	9223.18
21.62	9216.7
21.63	9210.23
21.64	9203.79
21.65	9197.37
21.66	9190.96
21.67	9184.58
21.68	9178.22
21.69	9171.87
21.7	9165.55
21.71	9159.25
21.72	9152.96
21.73	9146.7
21.74	9140.45
21.75	9134.23
21.76	9128.02
21.77	9121.84
21.78	9115.67
21.79	9109.52
21.8	9103.4
21.81	9097.29
21.82	9091.2
21.83	9085.13
21.84	9079.08
21.85	9073.04
21.86	9067.03
21.87	9061.03
21.88	9055.06
21.89	9049.1
21.9	9043.16
21.91	9037.24
21.92	9031.34
21.93	9025.46
21.94	9019.59
21.95	9013.75
21.96	9007.92
21.97	9002.11
21.98	8996.32
21.99	8990.55
22	8984.79
22.01	8979.05
22.02	8973.33
22.03	8967.63
22.04	8961.95
22.05	8956.28
22.06	8950.63
22.07	8945
22.08	8939.39
22.09	8933.79
22.1	8928.21
22.11	8922.65
22.12	8917.11
22.13	8911.58
22.14	8906.07
22.15	8900.58
22.16	8895.1
22.17	8889.65
22.18	8884.21
22.19	8878.78
22.2	8873.37
22.21	8867.98
22.22	8862.61
22.23	8857.25
22.24	8851.91
22.25	8846.59
22.26	8841.28
22.27	8835.99
22.28	8830.71
22.29	8825.45
22.3	8820.21
22.31	8814.98
22.32	8809.77
22.33	8804.58
22.34	8799.4
22.35	8794.24
22.36	8789.09
22.37	8783.96
22.38	8778.84
22.39	8773.74
22.4	8768.66
22.41	8763.59
22.42	8758.53
22.43	8753.5
22.44	8748.47
22.45	8743.47
22.46	8738.47
22.47	8733.5
22.48	8728.53
22.49	8723.59
22.5	8718.66
22.51	8713.74
22.52	8708.84
22.53	8703.95
22.54	8699.08
22.55	8694.22
22.56	8689.37
22.57	8684.55
22.58	8679.73
22.59	8674.93
22.6	8670.15
22.61	8665.37
22.62	8660.61
22.63	8655.87
22.64	8651.14
22.65	8646.43
22.66	8641.73
22.67	8637.04
22.68	8632.37
22.69	8627.71
22.7	8623.06
22.71	8618.43
22.72	8613.81
22.73	8609.2
22.74	8604.61
22.75	8600.03
22.76	8595.47
22.77	8590.92
22.78	8586.38
22.79	8581.85
22.8	8577.34
22.81	8572.84
22.82	8568.36
22.83	8563.89
22.84	8559.43
22.85	8554.98
22.86	8550.54
22.87	8546.12
22.88	8541.71
22.89	8537.32
22.9	8532.93
22.91	8528.56
22.92	8524.2
22.93	8519.85
22.94	8515.52
22.95	8511.19
22.96	8506.89
22.97	8502.59
22.98	8498.3
22.99	8494.02
23	8489.76
23.01	8485.51
23.02	8481.27
23.03	8477.05
23.04	8472.83
23.05	8468.62
23.06	8464.43
23.07	8460.25
23.08	8456.08
23.09	8451.92
23.1	8447.77
23.11	8443.64
23.12	8439.51
23.13	8435.4
23.14	8431.3
23.15	8427.2
23.16	8423.12
23.17	8419.05
23.18	8414.99
23.19	8410.94
23.2	8406.91
23.21	8402.88
23.22	8398.86
23.23	8394.86
23.24	8390.86
23.25	8386.87
23.26	8382.9
23.27	8378.93
23.28	8374.97
23.29	8371.01
23.3	8367.03
23.31	8363.02
23.32	8358.95
23.33	8354.81
23.34	8350.58
23.35	8346.23
23.36	8341.75
23.37	8337.13
23.38	8332.37
23.39	8327.46
23.4	8322.41
23.41	8317.25
23.42	8311.99
23.43	8306.69
23.44	8301.4
23.45	8296.19
23.46	8291.01
23.47	8285.77
23.48	8280.47
23.49	8275.12
23.5	8269.71
23.51	8264.25
23.52	8258.73
23.53	8253.16
23.54	8247.53
23.55	8241.85
23.56	8236.12
23.57	8230.34
23.58	8224.5
23.59	8218.62
23.6	8212.68
23.61	8206.7
23.62	8200.67
23.63	8194.59
23.64	8188.46
23.65	8182.29
23.66	8176.07
23.67	8169.8
23.68	8163.49
23.69	8157.14
23.7	8150.74
23.71	8144.3
23.72	8137.82
23.73	8131.3
23.74	8124.73
23.75	8118.13
23.76	8111.48
23.77	8104.8
23.78	8098.08
23.79	8091.32
23.8	8084.52
23.81	8077.69
23.82	8070.82
23.83	8063.92
23.84	8056.98
23.85	8050.01
23.86	8043.01
23.87	8035.97
23.88	8028.9
23.89	8021.8
23.9	8014.67
23.91	8007.51
23.92	8000.31
23.93	7993.1
23.94	7985.85
23.95	7978.57
23.96	7971.27
23.97	7963.94
23.98	7956.59
23.99	7949.21
24	7941.81
24.01	7934.38
24.02	7926.93
24.03	7919.46
24.04	7911.97
24.05	7904.45
24.06	7896.92
24.07	7889.36
24.08	7881.79
24.09	7874.19
24.1	7866.58
24.11	7858.96
24.12	7851.31
24.13	7843.65
24.14	7835.98
24.15	7828.28
24.16	7820.58
24.17	7812.86
24.18	7805.13
24.19	7797.39
24.2	7789.63
24.21	7781.86
24.22	7774.09
24.23	7766.3
24.24	7758.51
24.25	7750.7
24.26	7742.89
24.27	7735.08
24.28	7727.25
24.29	7719.42
24.3	7711.58
24.31	7703.74
24.32	7695.9
24.33	7688.05
24.34	7680.2
24.35	7672.35
24.36	7664.5
24.37	7656.64
24.38	7648.79
24.39	7640.93
24.4	7633.08
24.41	7625.23
24.42	7617.38
24.43	7609.54
24.44	7601.69
24.45	7593.86
24.46	7586.02
24.47	7578.2
24.48	7570.38
24.49	7562.56
24.5	7554.76
24.51	7546.96
24.52	7539.17
24.53	7531.39
24.54	7523.62
24.55	7515.86
24.56	7508.11
24.57	7500.38
24.58	7492.66
24.59	7484.95
24.6	7477.25
24.61	7469.57
24.62	7461.9
24.63	7454.25
24.64	7446.62
24.65	7439
24.66	7431.4
24.67	7423.82
24.68	7416.26
24.69	7408.72
24.7	7401.2
24.71	7393.7
24.72	7386.22
24.73	7378.76
24.74	7371.32
24.75	7363.91
24.76	7356.53
24.77	7349.16
24.78	7341.83
24.79	7334.52
24.8	7327.23
24.81	7319.98
24.82	7312.74
24.83	7305.54
24.84	7298.37
24.85	7291.23
24.86	7284.12
24.87	7277.04
24.88	7269.99
24.89	7262.98
24.9	7255.99
24.91	7249.04
24.92	7242.13
24.93	7235.25
24.94	7228.4
24.95	7221.59
24.96	7214.82
24.97	7208.09
[truncated: 2,503 more rows]

## Sheet: CaEC
Sampel CA
2θ - °	Intensity - cps
5	4437.44
5.01	4428.27
5.02	4419.31
5.03	4410.56
5.04	4402.02
5.05	4393.7
5.06	4385.58
5.07	4377.67
5.08	4369.96
5.09	4362.45
5.1	4355.15
5.11	4348.05
5.12	4341.14
5.13	4334.44
5.14	4327.92
5.15	4321.6
5.16	4315.47
5.17	4309.53
5.18	4303.79
5.19	4298.22
5.2	4292.85
5.21	4287.65
5.22	4282.64
5.23	4277.81
5.24	4273.15
5.25	4268.68
5.26	4264.38
5.27	4260.25
5.28	4256.3
5.29	4252.52
5.3	4248.9
5.31	4245.45
5.32	4242.17
5.33	4239.05
5.34	4236.1
5.35	4233.31
5.36	4230.67
5.37	4228.19
5.38	4225.87
5.39	4223.71
5.4	4221.69
5.41	4219.83
5.42	4218.11
5.43	4216.55
5.44	4215.13
5.45	4213.86
5.46	4212.73
5.47	4211.73
5.48	4210.88
5.49	4210.17
5.5	4209.6
5.51	4209.15
5.52	4208.85
5.53	4208.67
5.54	4208.62
5.55	4208.71
5.56	4208.92
5.57	4209.25
5.58	4209.71
5.59	4210.29
5.6	4210.99
5.61	4211.81
5.62	4212.74
5.63	4213.79
5.64	4214.96
5.65	4216.23
5.66	4217.62
5.67	4219.12
5.68	4220.72
5.69	4222.43
5.7	4224.24
5.71	4226.16
5.72	4228.17
5.73	4230.29
5.74	4232.5
5.75	4234.81
5.76	4237.21
5.77	4239.71
5.78	4242.29
5.79	4244.97
5.8	4247.73
5.81	4250.58
5.82	4253.52
5.83	4256.53
5.84	4259.63
5.85	4262.81
5.86	4266.07
5.87	4269.4
5.88	4272.81
5.89	4276.29
5.9	4279.84
5.91	4283.46
5.92	4287.15
5.93	4290.91
5.94	4294.73
5.95	4298.62
5.96	4302.56
5.97	4306.57
5.98	4310.64
5.99	4314.76
6	4318.94
6.01	4323.17
6.02	4327.45
6.03	4331.78
6.04	4336.17
6.05	4340.6
6.06	4345.07
6.07	4349.59
6.08	4354.15
6.09	4358.75
6.1	4363.4
6.11	4368.07
6.12	4372.79
6.13	4377.54
6.14	4382.32
6.15	4387.13
6.16	4391.97
6.17	4396.84
6.18	4401.73
6.19	4406.65
6.2	4411.6
6.21	4416.56
6.22	4421.54
6.23	4426.54
6.24	4431.56
6.25	4436.59
6.26	4441.64
6.27	4446.69
6.28	4451.76
6.29	4456.83
6.3	4461.91
6.31	4467
6.32	4472.09
6.33	4477.18
6.34	4482.27
6.35	4487.35
6.36	4492.44
6.37	4497.52
6.38	4502.6
6.39	4507.66
6.4	4512.72
6.41	4517.76
6.42	4522.8
6.43	4527.81
6.44	4532.81
6.45	4537.8
6.46	4542.76
6.47	4547.7
6.48	4552.62
6.49	4557.52
6.5	4562.39
6.51	4567.23
6.52	4572.05
6.53	4576.83
6.54	4581.58
6.55	4586.29
6.56	4590.97
6.57	4595.62
6.58	4600.22
6.59	4604.78
6.6	4609.3
6.61	4613.78
6.62	4618.21
6.63	4622.6
6.64	4626.93
6.65	4631.22
6.66	4635.45
6.67	4639.63
6.68	4643.76
6.69	4647.83
6.7	4651.84
6.71	4655.78
6.72	4659.67
6.73	4663.5
6.74	4667.26
6.75	4670.95
6.76	4674.57
6.77	4678.13
6.78	4681.61
6.79	4685.02
6.8	4688.36
6.81	4691.62
6.82	4694.8
6.83	4697.9
6.84	4700.92
6.85	4703.86
6.86	4706.71
6.87	4709.48
6.88	4712.16
6.89	4714.75
6.9	4717.25
6.91	4719.66
6.92	4721.97
6.93	4724.19
6.94	4726.31
6.95	4728.29
6.96	4730.1
6.97	4731.75
6.98	4733.24
6.99	4734.58
7	4735.78
7.01	4736.85
7.02	4737.79
7.03	4738.62
7.04	4739.33
7.05	4739.95
7.06	4740.49
7.07	4740.95
7.08	4741.35
7.09	4741.69
7.1	4741.99
7.11	4742.25
7.12	4742.47
7.13	4742.66
7.14	4742.78
7.15	4742.81
7.16	4742.74
7.17	4742.59
7.18	4742.34
7.19	4742
7.2	4741.58
7.21	4741.07
7.22	4740.47
7.23	4739.78
7.24	4739.01
7.25	4738.16
7.26	4737.22
7.27	4736.2
7.28	4735.1
7.29	4733.92
7.3	4732.66
7.31	4731.32
7.32	4729.9
7.33	4728.4
7.34	4726.83
7.35	4725.19
7.36	4723.47
7.37	4721.67
7.38	4719.8
7.39	4717.86
7.4	4715.85
7.41	4713.77
7.42	4711.62
7.43	4709.4
7.44	4707.12
7.45	4704.77
7.46	4702.35
7.47	4699.87
7.48	4697.32
7.49	4694.72
7.5	4692.05
7.51	4689.31
7.52	4686.52
7.53	4683.67
7.54	4680.76
7.55	4677.79
7.56	4674.77
7.57	4671.69
7.58	4668.55
7.59	4665.36
7.6	4662.12
7.61	4658.83
7.62	4655.48
7.63	4652.08
7.64	4648.64
7.65	4645.14
7.66	4641.6
7.67	4638.01
7.68	4634.37
7.69	4630.69
7.7	4626.97
7.71	4623.2
7.72	4619.39
7.73	4615.53
7.74	4611.64
7.75	4607.7
7.76	4603.73
7.77	4599.72
7.78	4595.67
7.79	4591.59
7.8	4587.47
7.81	4583.31
7.82	4579.12
7.83	4574.9
7.84	4570.65
7.85	4566.36
7.86	4562.05
7.87	4557.7
7.88	4553.33
7.89	4548.93
7.9	4544.5
7.91	4540.05
7.92	4535.57
7.93	4531.07
7.94	4526.55
7.95	4522
7.96	4517.43
7.97	4512.84
7.98	4508.23
7.99	4503.61
8	4498.96
8.01	4494.3
8.02	4489.62
8.03	4484.93
8.04	4480.22
8.05	4475.5
8.06	4470.77
8.07	4466.02
8.08	4461.27
8.09	4456.5
8.1	4451.73
8.11	4446.95
8.12	4442.16
8.13	4437.36
8.14	4432.56
8.15	4427.75
8.16	4422.94
8.17	4418.13
8.18	4413.32
8.19	4408.5
8.2	4403.69
8.21	4398.88
8.22	4394.06
8.23	4389.25
8.24	4384.44
8.25	4379.64
8.26	4374.85
8.27	4370.06
8.28	4365.27
8.29	4360.49
8.3	4355.73
8.31	4350.97
8.32	4346.22
8.33	4341.48
8.34	4336.76
8.35	4332.05
8.36	4327.35
8.37	4322.67
8.38	4318.01
8.39	4313.36
8.4	4308.73
8.41	4304.11
8.42	4299.52
8.43	4294.95
8.44	4290.4
8.45	4285.86
8.46	4281.36
8.47	4276.87
8.48	4272.41
8.49	4267.98
8.5	4263.57
8.51	4259.19
8.52	4254.84
8.53	4250.52
8.54	4246.23
8.55	4241.97
8.56	4237.74
8.57	4233.54
8.58	4229.38
8.59	4225.25
8.6	4221.15
8.61	4217.1
8.62	4213.07
8.63	4209.09
8.64	4205.15
8.65	4201.24
8.66	4197.38
8.67	4193.56
8.68	4189.78
8.69	4186.04
8.7	4182.35
8.71	4178.7
8.72	4175.1
8.73	4171.55
8.74	4168.04
8.75	4164.58
8.76	4161.17
8.77	4157.81
8.78	4154.5
8.79	4151.25
8.8	4148.05
8.81	4144.9
8.82	4141.8
8.83	4138.77
8.84	4135.78
8.85	4132.86
8.86	4129.99
8.87	4127.19
8.88	4124.44
8.89	4121.75
8.9	4119.13
8.91	4116.57
8.92	4114.07
8.93	4111.64
8.94	4109.27
8.95	4106.97
8.96	4104.73
8.97	4102.57
8.98	4100.47
8.99	4098.46
9	4096.43
9.01	4094.23
9.02	4091.73
9.03	4088.83
9.04	4085.45
9.05	4081.53
9.06	4077.02
9.07	4071.93
9.08	4066.27
9.09	4060.08
9.1	4053.44
9.11	4046.44
9.12	4039.21
9.13	4031.91
9.14	4024.72
9.15	4017.86
9.16	4011.58
9.17	4006.17
9.18	4001.31
9.19	3996.48
9.2	3991.7
9.21	3986.95
9.22	3982.23
9.23	3977.55
9.24	3972.9
9.25	3968.29
9.26	3963.72
9.27	3959.17
9.28	3954.67
9.29	3950.19
9.3	3945.76
9.31	3941.35
9.32	3936.98
9.33	3932.64
9.34	3928.34
9.35	3924.06
9.36	3919.82
9.37	3915.62
9.38	3911.44
9.39	3907.3
9.4	3903.19
9.41	3899.11
9.42	3895.06
9.43	3891.04
9.44	3887.05
9.45	3883.1
9.46	3879.18
9.47	3875.28
9.48	3871.42
9.49	3867.58
9.5	3863.78
9.51	3860
9.52	3856.26
9.53	3852.54
9.54	3848.85
9.55	3845.19
9.56	3841.56
9.57	3837.95
9.58	3834.38
9.59	3830.83
9.6	3827.31
9.61	3823.82
9.62	3820.36
9.63	3816.92
9.64	3813.51
9.65	3810.12
9.66	3806.76
9.67	3803.43
9.68	3800.12
9.69	3796.84
9.7	3793.59
9.71	3790.36
9.72	3787.15
9.73	3783.97
9.74	3780.81
9.75	3777.68
9.76	3774.57
9.77	3771.49
9.78	3768.43
9.79	3765.39
9.8	3762.38
9.81	3759.39
9.82	3756.42
9.83	3753.48
9.84	3750.56
9.85	3747.66
9.86	3744.78
9.87	3741.92
9.88	3739.09
9.89	3736.28
9.9	3733.49
9.91	3730.72
9.92	3727.97
9.93	3725.24
9.94	3722.53
9.95	3719.84
9.96	3717.17
9.97	3714.52
9.98	3711.89
9.99	3709.28
10	3706.69
10.01	3704.12
10.02	3701.56
10.03	3699.03
10.04	3696.51
10.05	3694.01
10.06	3691.53
10.07	3689.07
10.08	3686.62
10.09	3684.19
10.1	3681.78
10.11	3679.39
10.12	3677.01
10.13	3674.64
10.14	3672.3
10.15	3669.97
10.16	3667.65
10.17	3665.35
10.18	3663.07
10.19	3660.8
10.2	3658.55
10.21	3656.31
10.22	3654.08
10.23	3651.87
10.24	3649.67
10.25	3647.49
10.26	3645.32
10.27	3643.16
10.28	3641.02
10.29	3638.89
10.3	3636.77
10.31	3634.67
10.32	3632.58
10.33	3630.5
10.34	3628.43
10.35	3626.37
10.36	3624.32
10.37	3622.29
10.38	3620.27
10.39	3618.25
10.4	3616.25
10.41	3614.26
10.42	3612.28
10.43	3610.31
10.44	3608.34
10.45	3606.39
10.46	3604.45
10.47	3602.52
10.48	3600.59
10.49	3598.68
10.5	3596.77
10.51	3594.87
10.52	3592.98
10.53	3591.09
10.54	3589.22
10.55	3587.35
10.56	3585.49
10.57	3583.63
10.58	3581.78
10.59	3579.94
10.6	3578.11
10.61	3576.28
10.62	3574.46
10.63	3572.64
10.64	3570.83
10.65	3569.02
10.66	3567.22
10.67	3565.43
10.68	3563.63
10.69	3561.85
10.7	3560.06
10.71	3558.28
10.72	3556.51
10.73	3554.74
10.74	3552.97
10.75	3551.21
10.76	3549.44
10.77	3547.68
10.78	3545.93
10.79	3544.17
10.8	3542.42
10.81	3540.67
10.82	3538.92
10.83	3537.18
10.84	3535.43
10.85	3533.68
10.86	3531.94
10.87	3530.2
10.88	3528.45
10.89	3526.71
10.9	3524.97
10.91	3523.22
10.92	3521.48
10.93	3519.74
10.94	3517.99
10.95	3516.25
10.96	3514.5
10.97	3512.75
10.98	3511
10.99	3509.25
11	3507.49
11.01	3505.73
11.02	3503.97
11.03	3502.71
11.04	3502.26
11.05	3502.37
11.06	3502.8
11.07	3503.34
11.08	3503.8
11.09	3504.02
11.1	3503.89
11.11	3503.3
11.12	3502.19
11.13	3500.52
11.14	3498.28
11.15	3495.5
11.16	3492.23
11.17	3488.53
11.18	3484.5
11.19	3480.25
11.2	3475.89
11.21	3471.55
11.22	3467.38
11.23	3463.4
11.24	3459.64
11.25	3456.12
11.26	3452.84
11.27	3449.82
11.28	3447.09
11.29	3444.65
11.3	3442.51
11.31	3440.7
11.32	3439.22
11.33	3438.1
11.34	3437.34
11.35	3436.97
11.36	3436.99
11.37	3437.43
11.38	3438.3
11.39	3439.6
11.4	3441.37
11.41	3443.6
11.42	3446.32
11.43	3449.55
11.44	3453.28
11.45	3457.47
11.46	3462.07
11.47	3467.02
11.48	3472.27
11.49	3477.75
11.5	3483.43
11.51	3489.23
11.52	3495.11
11.53	3501.01
11.54	3506.88
11.55	3512.66
11.56	3518.29
11.57	3523.72
11.58	3528.89
11.59	3533.76
11.6	3538.26
11.61	3542.34
11.62	3545.94
11.63	3549.02
11.64	3551.5
11.65	3553.35
11.66	3554.5
11.67	3554.89
11.68	3554.49
11.69	3553.21
11.7	3551.03
11.71	3547.89
11.72	3543.93
11.73	3539.24
11.74	3533.99
11.75	3528.28
11.76	3522.26
11.77	3516.06
11.78	3509.8
11.79	3503.62
11.8	3497.65
11.81	3492.02
11.82	3486.87
11.83	3482.32
11.84	3478.5
11.85	3475.55
11.86	3473.6
11.87	3472.78
11.88	3473.22
11.89	3475.05
11.9	3478.4
11.91	3483.41
11.92	3490.21
11.93	3498.92
11.94	3509.68
11.95	3522.62
11.96	3537.87
11.97	3555.57
11.98	3575.77
11.99	3598.26
12	3622.76
12.01	3648.98
12.02	3676.65
12.03	3705.47
12.04	3735.18
12.05	3765.47
12.06	3796.07
12.07	3826.7
12.08	3857.08
12.09	3886.91
12.1	3915.92
12.11	3943.83
12.12	3970.35
12.13	3995.19
12.14	4018.09
12.15	4038.74
12.16	4056.87
12.17	4072.2
12.18	4084.45
12.19	4093.32
12.2	4098.54
12.21	4099.91
12.22	4097.61
12.23	4091.89
12.24	4083.01
12.25	4071.22
12.26	4056.78
12.27	4039.97
12.28	4021.02
12.29	4000.2
12.3	3977.77
12.31	3953.98
12.32	3929.1
12.33	3903.38
12.34	3877.08
12.35	3850.45
12.36	3823.77
12.37	3797.28
12.38	3771.24
12.39	3745.91
12.4	3721.55
12.41	3698.41
12.42	3676.77
12.43	3656.86
12.44	3638.9
12.45	3622.86
12.46	3608.66
12.47	3596.22
12.48	3585.45
12.49	3576.27
12.5	3568.6
12.51	3562.37
12.52	3557.48
12.53	3553.86
12.54	3551.43
12.55	3550.1
12.56	3549.79
12.57	3550.43
12.58	3551.92
12.59	3554.19
12.6	3557.15
12.61	3560.73
12.62	3564.84
12.63	3569.41
12.64	3574.34
12.65	3579.56
12.66	3584.98
12.67	3590.54
12.68	3596.2
12.69	3601.92
12.7	3607.69
12.71	3613.47
12.72	3619.23
12.73	3624.95
12.74	3630.59
12.75	3636.14
12.76	3641.57
12.77	3646.83
12.78	3651.92
12.79	3656.79
12.8	3661.42
12.81	3665.79
12.82	3669.86
12.83	3673.61
12.84	3677.01
12.85	3680.03
12.86	3682.64
12.87	3684.82
12.88	3686.54
12.89	3687.76
12.9	3688.48
12.91	3688.74
12.92	3688.57
12.93	3688.03
12.94	3687.18
12.95	3686.05
12.96	3684.71
12.97	3683.2
12.98	3681.57
12.99	3679.87
13	3678.15
13.01	3676.46
13.02	3674.85
13.03	3673.37
13.04	3672.08
13.05	3671.01
13.06	3670.22
13.07	3669.57
13.08	3669.13
13.09	3669.2
13.1	3670.01
13.11	3671.69
13.12	3674.3
13.13	3677.83
13.14	3682.21
13.15	3687.31
13.16	3692.96
13.17	3698.97
13.18	3705.14
13.19	3711.26
13.2	3717.16
13.21	3722.71
13.22	3727.84
13.23	3732.59
13.24	3737.1
13.25	3741.65
13.26	3746.33
13.27	3750.95
13.28	3755.51
13.29	3760.01
13.3	3764.46
13.31	3768.84
13.32	3773.18
13.33	3777.45
13.34	3781.67
13.35	3785.84
13.36	3789.96
13.37	3794.03
13.38	3798.05
13.39	3802.02
13.4	3805.94
13.41	3809.82
13.42	3813.65
13.43	3817.44
13.44	3821.18
13.45	3824.89
13.46	3828.55
13.47	3832.18
13.48	3835.76
13.49	3839.31
13.5	3842.82
13.51	3846.3
13.52	3849.75
13.53	3853.16
13.54	3856.54
13.55	3859.89
13.56	3863.21
13.57	3866.5
13.58	3869.76
13.59	3873
13.6	3876.21
13.61	3879.4
13.62	3882.57
13.63	3885.71
13.64	3888.84
13.65	3891.94
13.66	3895.03
13.67	3898.09
13.68	3901.15
13.69	3904.18
13.7	3907.21
13.71	3910.22
13.72	3913.22
13.73	3916.2
13.74	3919.18
13.75	3922.15
13.76	3925.11
13.77	3928.07
13.78	3931.02
13.79	3933.96
13.8	3936.91
13.81	3939.85
13.82	3942.79
13.83	3945.73
13.84	3948.67
13.85	3951.61
13.86	3954.56
13.87	3957.51
13.88	3960.47
13.89	3963.44
13.9	3966.41
13.91	3969.39
13.92	3972.39
13.93	3975.39
13.94	3978.41
13.95	3981.44
13.96	3984.48
13.97	3987.54
13.98	3990.62
13.99	3993.71
14	3996.82
14.01	3999.96
14.02	4003.11
14.03	4006.29
14.04	4009.49
14.05	4012.72
14.06	4015.97
14.07	4019.24
14.08	4022.55
14.09	4025.88
14.1	4029.24
14.11	4032.64
14.12	4036.07
14.13	4039.53
14.14	4043.02
14.15	4046.55
14.16	4050.12
14.17	4053.72
14.18	4057.37
14.19	4061.05
14.2	4064.77
14.21	4068.54
14.22	4072.35
14.23	4076.2
14.24	4080.1
14.25	4084.05
14.26	4088.04
14.27	4092.08
14.28	4096.18
14.29	4100.32
14.3	4104.51
14.31	4108.76
14.32	4113.06
14.33	4117.42
14.34	4121.83
14.35	4126.31
14.36	4130.84
14.37	4135.42
14.38	4140.07
14.39	4144.79
14.4	4149.56
14.41	4154.4
14.42	4159.31
14.43	4164.28
14.44	4169.31
14.45	4174.42
14.46	4179.6
14.47	4184.85
14.48	4190.16
14.49	4195.56
14.5	4201.02
14.51	4206.56
14.52	4212.18
14.53	4217.88
14.54	4223.65
14.55	4229.5
14.56	4235.43
14.57	4241.45
14.58	4247.55
14.59	4253.73
14.6	4259.99
14.61	4266.35
14.62	4272.79
14.63	4279.32
14.64	4285.93
14.65	4292.64
14.66	4299.44
14.67	4306.34
14.68	4313.32
14.69	4320.4
14.7	4327.58
14.71	4334.85
14.72	4342.23
14.73	4349.7
14.74	4357.27
14.75	4364.95
14.76	4372.72
14.77	4380.6
14.78	4388.59
14.79	4396.68
14.8	4404.88
14.81	4413.19
14.82	4421.6
14.83	4430.13
14.84	4438.77
14.85	4447.52
14.86	4456.38
14.87	4465.36
14.88	4474.45
14.89	4483.66
14.9	4492.99
14.91	4502.44
14.92	4512.01
14.93	4521.7
14.94	4531.51
14.95	4541.45
14.96	4551.51
14.97	4561.7
14.98	4572.01
14.99	4582.45
15	4593.02
15.01	4603.72
15.02	4614.55
15.03	4625.52
15.04	4636.62
15.05	4647.85
15.06	4659.22
15.07	4670.72
15.08	4682.36
15.09	4694.15
15.1	4706.07
15.11	4719.32
15.12	4734.55
15.13	4751.01
15.14	4768.02
15.15	4784.99
15.16	4801.4
15.17	4816.83
15.18	4830.93
15.19	4843.42
15.2	4854.13
15.21	4862.97
15.22	4869.92
15.23	4875.07
15.24	4878.58
15.25	4880.73
15.26	4881.86
15.27	4882.43
15.28	4882.97
15.29	4884.13
15.3	4885.87
15.31	4887.7
15.32	4889.6
15.33	4891.57
15.34	4893.63
15.35	4895.75
15.36	4897.96
15.37	4900.24
15.38	4902.59
15.39	4905.02
15.4	4907.52
15.41	4910.09
15.42	4912.74
15.43	4915.46
15.44	4918.25
15.45	4921.11
15.46	4924.04
15.47	4927.05
15.48	4930.12
15.49	4933.26
15.5	4936.48
15.51	4939.76
15.52	4943.11
15.53	4946.52
15.54	4950.01
15.55	4953.56
15.56	4957.18
15.57	4960.87
15.58	4964.62
15.59	4968.44
15.6	4972.32
15.61	4976.26
15.62	4980.27
15.63	4984.35
15.64	4988.48
15.65	4992.68
15.66	4996.95
15.67	5001.27
15.68	5005.66
15.69	5010.1
15.7	5014.61
15.71	5019.18
15.72	5023.81
15.73	5028.49
15.74	5033.24
15.75	5038.05
15.76	5042.91
15.77	5047.83
15.78	5052.81
15.79	5057.84
15.8	5062.93
15.81	5068.08
15.82	5073.28
15.83	5078.54
15.84	5083.85
15.85	5089.22
15.86	5094.63
15.87	5100.11
15.88	5105.63
15.89	5111.21
15.9	5116.84
15.91	5122.52
15.92	5128.26
15.93	5134.04
15.94	5139.88
15.95	5145.76
15.96	5151.7
15.97	5157.68
15.98	5163.71
15.99	5169.79
16	5175.92
16.01	5182.09
16.02	5188.31
16.03	5194.58
16.04	5200.9
16.05	5207.26
16.06	5213.66
16.07	5220.11
16.08	5226.61
16.09	5233.15
16.1	5239.73
16.11	5246.35
16.12	5253.02
16.13	5259.73
16.14	5266.48
16.15	5273.27
16.16	5280.1
16.17	5286.98
16.18	5293.89
16.19	5300.85
16.2	5307.84
16.21	5314.87
16.22	5321.94
16.23	5329.05
16.24	5336.19
16.25	5343.37
16.26	5350.59
16.27	5357.85
16.28	5365.14
16.29	5372.46
16.3	5379.82
16.31	5387.22
16.32	5394.65
16.33	5402.11
16.34	5409.6
16.35	5417.13
16.36	5424.69
16.37	5432.28
16.38	5439.91
16.39	5447.56
16.4	5455.25
16.41	5462.96
16.42	5470.71
16.43	5478.48
16.44	5486.28
16.45	5494.12
16.46	5501.98
16.47	5509.86
16.48	5517.78
16.49	5525.72
16.5	5533.69
16.51	5541.68
16.52	5549.7
16.53	5557.74
16.54	5565.81
16.55	5573.9
16.56	5582.01
16.57	5590.15
16.58	5598.31
16.59	5606.5
16.6	5614.7
16.61	5622.93
16.62	5631.18
16.63	5639.45
16.64	5647.74
16.65	5656.05
16.66	5664.38
16.67	5672.72
16.68	5681.09
16.69	5689.47
16.7	5697.88
16.71	5706.29
16.72	5714.73
16.73	5723.18
16.74	5731.65
16.75	5740.13
16.76	5748.63
16.77	5757.15
16.78	5765.67
16.79	5774.21
16.8	5782.77
16.81	5791.34
16.82	5799.92
16.83	5808.51
16.84	5817.11
16.85	5825.73
16.86	5834.35
16.87	5842.99
16.88	5851.63
16.89	5860.29
16.9	5868.95
16.91	5877.62
16.92	5886.31
16.93	5894.99
16.94	5903.69
16.95	5912.39
16.96	5921.1
16.97	5929.82
16.98	5938.54
16.99	5947.27
17	5956
17.01	5964.73
17.02	5973.47
17.03	5982.21
17.04	5990.96
17.05	5999.71
17.06	6008.46
17.07	6017.21
17.08	6025.96
17.09	6034.72
17.1	6043.47
17.11	6052.23
17.12	6060.98
17.13	6069.73
17.14	6078.49
17.15	6087.28
17.16	6096.18
17.17	6105.2
17.18	6114.36
17.19	6123.65
17.2	6133.09
17.21	6142.67
17.22	6152.36
17.23	6162.17
17.24	6172.06
17.25	6182.02
17.26	6192.02
17.27	6202.03
17.28	6212.01
17.29	6221.92
17.3	6231.72
17.31	6241.38
17.32	6250.85
17.33	6260.07
17.34	6269.15
17.35	6278.2
17.36	6287.23
17.37	6296.24
17.38	6305.23
17.39	6314.2
17.4	6323.15
17.41	6332.07
17.42	6340.98
17.43	6349.86
17.44	6358.73
17.45	6367.57
17.46	6376.4
17.47	6385.2
17.48	6393.98
17.49	6402.74
17.5	6411.49
17.51	6420.21
17.52	6428.92
17.53	6437.6
17.54	6446.27
17.55	6454.92
17.56	6463.55
17.57	6472.16
17.58	6480.75
17.59	6489.32
17.6	6497.88
17.61	6506.42
17.62	6514.94
17.63	6523.44
17.64	6531.92
17.65	6540.39
17.66	6548.84
17.67	6557.27
17.68	6565.68
17.69	6574.08
17.7	6582.46
17.71	6590.82
17.72	6599.17
17.73	6607.5
17.74	6615.82
17.75	6624.12
17.76	6632.4
17.77	6640.67
17.78	6648.92
17.79	6657.16
17.8	6665.38
17.81	6673.59
17.82	6681.78
17.83	6689.95
17.84	6698.11
17.85	6706.26
17.86	6714.39
17.87	6722.51
17.88	6730.61
17.89	6738.7
17.9	6746.78
17.91	6754.84
17.92	6762.89
17.93	6770.93
17.94	6778.95
17.95	6786.96
17.96	6794.95
17.97	6802.94
17.98	6810.9
17.99	6818.86
18	6826.81
18.01	6834.74
18.02	6842.66
18.03	6850.57
18.04	6858.47
18.05	6866.35
18.06	6874.23
18.07	6882.09
18.08	6889.94
18.09	6897.78
18.1	6905.61
18.11	6913.42
18.12	6921.23
18.13	6929.03
18.14	6936.81
18.15	6944.59
18.16	6952.35
18.17	6960.11
18.18	6967.86
18.19	6975.59
18.2	6983.32
18.21	6991.04
18.22	6998.75
18.23	7006.44
18.24	7014.14
18.25	7021.82
18.26	7029.49
18.27	7037.15
18.28	7044.81
18.29	7052.46
18.3	7060.1
18.31	7067.73
18.32	7075.35
18.33	7082.97
18.34	7090.57
18.35	7098.18
18.36	7105.77
18.37	7113.36
18.38	7120.94
18.39	7128.51
18.4	7136.08
18.41	7143.64
18.42	7151.19
18.43	7158.74
18.44	7166.28
18.45	7173.81
18.46	7181.34
18.47	7188.87
18.48	7196.39
18.49	7203.9
18.5	7211.41
18.51	7218.91
18.52	7226.41
18.53	7233.9
18.54	7241.39
18.55	7248.88
18.56	7256.35
18.57	7263.83
18.58	7271.3
18.59	7278.77
18.6	7286.23
18.61	7293.69
18.62	7301.15
18.63	7308.6
18.64	7316.06
18.65	7323.5
18.66	7330.95
18.67	7338.39
18.68	7345.83
18.69	7353.27
18.7	7360.7
18.71	7368.13
18.72	7375.56
18.73	7382.99
18.74	7390.42
18.75	7397.84
18.76	7405.27
18.77	7412.69
18.78	7420.11
18.79	7427.53
18.8	7434.95
18.81	7442.37
18.82	7449.79
18.83	7457.21
18.84	7464.62
18.85	7472.04
18.86	7479.46
18.87	7486.88
18.88	7494.29
18.89	7501.71
18.9	7509.13
18.91	7516.55
18.92	7523.97
18.93	7531.39
18.94	7538.82
18.95	7546.24
18.96	7553.67
18.97	7561.09
18.98	7568.52
18.99	7575.95
19	7583.39
19.01	7590.82
19.02	7598.26
19.03	7605.7
19.04	7613.14
19.05	7620.59
19.06	7628.03
19.07	7635.49
19.08	7642.94
19.09	7650.4
19.1	7657.86
19.11	7665.32
19.12	7672.79
19.13	7680.27
19.14	7687.74
19.15	7695.22
19.16	7702.71
19.17	7710.2
19.18	7717.69
19.19	7724.66
19.2	7730.55
19.21	7735.39
19.22	7739.18
19.23	7741.95
19.24	7743.76
19.25	7744.66
19.26	7744.74
19.27	7744.09
19.28	7742.82
19.29	7741.09
19.3	7739.06
19.31	7736.91
19.32	7734.86
19.33	7733.15
19.34	7732.06
19.35	7731.89
19.36	7732.97
19.37	7735.67
19.38	7739.27
19.39	7742.81
19.4	7746.28
19.41	7749.69
19.42	7753.03
19.43	7756.3
19.44	7759.52
19.45	7762.66
19.46	7765.75
19.47	7768.77
19.48	7771.73
19.49	7774.64
19.5	7777.48
19.51	7780.26
19.52	7782.99
19.53	7785.66
19.54	7788.27
19.55	7790.82
19.56	7793.32
19.57	7795.77
19.58	7798.16
19.59	7800.5
19.6	7802.79
19.61	7805.02
19.62	7807.21
19.63	7809.34
19.64	7811.43
19.65	7813.46
19.66	7815.45
19.67	7817.39
19.68	7819.29
19.69	7821.14
19.7	7822.94
19.71	7824.7
19.72	7826.42
19.73	7828.1
19.74	7829.73
19.75	7831.32
19.76	7832.87
19.77	7834.38
19.78	7835.85
19.79	7837.29
19.8	7838.68
19.81	7840.04
19.82	7841.36
19.83	7842.65
19.84	7843.9
19.85	7845.12
19.86	7846.31
19.87	7847.46
19.88	7848.58
19.89	7849.68
19.9	7850.74
19.91	7851.77
19.92	7852.77
19.93	7853.74
19.94	7854.69
19.95	7855.61
19.96	7856.5
19.97	7857.37
19.98	7858.22
19.99	7859.04
20	7859.84
20.01	7860.61
20.02	7861.37
20.03	7862.1
20.04	7862.82
20.05	7863.51
20.06	7864.19
20.07	7864.85
20.08	7865.49
20.09	7866.11
20.1	7866.72
20.11	7867.32
20.12	7867.9
20.13	7868.47
20.14	7869.02
20.15	7869.56
20.16	7870.1
20.17	7870.62
20.18	7871.13
20.19	7871.63
20.2	7872.13
20.21	7872.61
20.22	7873.09
20.23	7873.57
20.24	7874.04
20.25	7874.5
20.26	7874.96
20.27	7875.42
20.28	7875.87
20.29	7876.33
20.3	7876.78
20.31	7877.23
20.32	7877.68
20.33	7878.14
20.34	7878.59
20.35	7879.05
20.36	7879.52
20.37	7879.98
20.38	7880.45
20.39	7880.93
20.4	7881.41
20.41	7881.91
20.42	7882.4
20.43	7882.91
20.44	7883.43
20.45	7883.96
20.46	7884.49
20.47	7885.04
20.48	7885.6
20.49	7886.18
20.5	7886.77
20.51	7887.37
20.52	7887.99
20.53	7888.62
20.54	7889.27
20.55	7889.94
20.56	7890.63
20.57	7891.34
20.58	7892.06
20.59	7892.81
20.6	7893.57
20.61	7894.36
20.62	7895.17
20.63	7896.01
20.64	7896.87
20.65	7897.75
20.66	7898.66
20.67	7899.59
20.68	7900.56
20.69	7901.55
20.7	7902.56
20.71	7903.61
20.72	7904.69
20.73	7905.8
20.74	7906.94
20.75	7908.11
20.76	7909.31
20.77	7910.55
20.78	7911.82
20.79	7913.13
20.8	7914.47
20.81	7915.85
20.82	7917.27
20.83	7918.72
20.84	7920.22
20.85	7921.75
20.86	7923.32
20.87	7924.94
20.88	7926.59
20.89	7928.29
20.9	7930.03
20.91	7931.82
20.92	7933.65
20.93	7935.52
20.94	7937.44
20.95	7939.41
20.96	7941.43
20.97	7943.49
20.98	7945.6
20.99	7947.77
21	7949.98
21.01	7952.24
21.02	7954.56
21.03	7956.93
21.04	7959.35
21.05	7961.82
21.06	7964.36
21.07	7966.94
21.08	7969.59
21.09	7972.29
21.1	7975.04
21.11	7977.86
21.12	7980.74
21.13	7983.67
21.14	7986.67
21.15	7989.73
21.16	7992.85
21.17	7996.03
21.18	7999.28
21.19	8002.59
21.2	8005.96
21.21	8009.4
21.22	8012.91
21.23	8017.11
21.24	8022.24
21.25	8027.81
21.26	8033.4
21.27	8038.63
21.28	8043.19
21.29	8046.82
21.3	8049.36
21.31	8050.67
21.32	8050.69
21.33	8049.41
21.34	8046.89
21.35	8043.25
21.36	8038.68
21.37	8033.4
21.38	8027.72
21.39	8022.01
21.4	8016.69
21.41	8012.23
21.42	8008.43
21.43	8004.7
21.44	8001.04
21.45	7997.44
21.46	7993.91
21.47	7990.45
21.48	7987.06
21.49	7983.73
21.5	7980.46
21.51	7977.26
21.52	7974.13
21.53	7971.05
21.54	7968.04
21.55	7965.09
21.56	7962.19
21.57	7959.36
21.58	7956.59
21.59	7953.87
21.6	7951.21
21.61	7948.61
21.62	7946.07
21.63	7943.58
21.64	7941.14
21.65	7938.76
21.66	7936.43
21.67	7934.15
21.68	7931.93
21.69	7929.75
21.7	7927.63
21.71	7925.56
21.72	7923.53
21.73	7921.55
21.74	7919.62
21.75	7917.73
21.76	7915.9
21.77	7914.1
21.78	7912.35
21.79	7910.65
21.8	7908.99
21.81	7907.37
21.82	7905.79
21.83	7904.25
21.84	7902.75
21.85	7901.29
21.86	7899.87
21.87	7898.49
21.88	7897.14
21.89	7895.83
21.9	7894.56
21.91	7893.32
21.92	7892.11
21.93	7890.94
21.94	7889.8
21.95	7888.7
21.96	7887.62
21.97	7886.58
21.98	7885.56
21.99	7884.57
22	7883.62
22.01	7882.69
22.02	7881.78
22.03	7880.91
22.04	7880.06
22.05	7879.23
22.06	7878.43
22.07	7877.65
22.08	7876.89
22.09	7876.15
22.1	7875.44
22.11	7874.75
22.12	7874.07
22.13	7873.42
22.14	7872.78
22.15	7872.16
22.16	7871.56
22.17	7870.97
22.18	7870.4
22.19	7869.84
22.2	7869.3
22.21	7868.77
22.22	7868.25
22.23	7867.75
22.24	7867.25
22.25	7866.77
22.26	7866.29
22.27	7865.82
22.28	7865.37
22.29	7864.91
22.3	7864.47
22.31	7864.03
22.32	7863.6
22.33	7863.17
22.34	7862.74
22.35	7862.32
22.36	7861.9
22.37	7861.48
22.38	7861.06
22.39	7860.64
22.4	7860.22
22.41	7859.8
22.42	7859.38
22.43	7858.96
22.44	7858.53
22.45	7858.09
22.46	7857.65
22.47	7857.21
22.48	7856.76
22.49	7856.3
22.5	7855.84
22.51	7855.36
22.52	7854.88
22.53	7854.39
22.54	7853.88
22.55	7853.36
22.56	7852.84
22.57	7852.29
22.58	7851.74
22.59	7851.17
22.6	7850.58
22.61	7849.98
22.62	7849.36
22.63	7848.73
22.64	7848.07
22.65	7847.4
22.66	7846.71
22.67	7846
22.68	7845.27
22.69	7844.51
22.7	7843.73
22.71	7842.93
22.72	7842.11
22.73	7841.26
22.74	7840.39
22.75	7839.48
22.76	7838.56
22.77	7837.6
22.78	7836.62
22.79	7835.61
22.8	7834.57
22.81	7833.49
22.82	7832.39
22.83	7831.26
22.84	7830.09
22.85	7828.89
22.86	7827.65
22.87	7826.38
22.88	7825.07
22.89	7823.73
22.9	7822.35
22.91	7820.94
22.92	7819.48
22.93	7817.99
22.94	7816.45
22.95	7814.88
22.96	7813.26
22.97	7811.6
22.98	7809.9
22.99	7808.16
23	7806.37
23.01	7804.53
23.02	7802.65
23.03	7800.73
23.04	7798.75
23.05	7796.73
23.06	7794.66
23.07	7792.54
23.08	7790.38
23.09	7788.15
23.1	7785.88
23.11	7783.56
23.12	7781.18
23.13	7778.75
23.14	7776.27
23.15	7773.73
23.16	7771.13
23.17	7768.48
23.18	7765.77
23.19	7763
23.2	7760.18
23.21	7757.29
23.22	7754.34
23.23	7751.34
23.24	7748.27
23.25	7745.14
23.26	7741.94
23.27	7738.2
23.28	7733.49
23.29	7727.94
23.3	7721.69
23.31	7714.86
23.32	7707.59
23.33	7700.02
23.34	7692.28
23.35	7684.52
23.36	7676.84
23.37	7669.38
23.38	7662.23
23.39	7655.52
23.4	7649.32
23.41	7643.72
23.42	7638.76
23.43	7634.5
23.44	7630.95
23.45	7628.12
23.46	7625.65
23.47	7623.21
23.48	7620.79
23.49	7618.4
23.5	7616.04
23.51	7613.7
23.52	7611.38
23.53	7609.09
23.54	7606.82
23.55	7604.57
23.56	7602.35
23.57	7600.15
23.58	7597.96
23.59	7595.8
23.6	7593.66
23.61	7591.53
23.62	7589.43
23.63	7587.34
23.64	7585.27
23.65	7583.22
23.66	7581.18
23.67	7579.16
23.68	7577.15
23.69	7575.16
23.7	7573.18
23.71	7571.22
23.72	7569.27
23.73	7567.33
23.74	7565.4
23.75	7563.48
23.76	7561.58
23.77	7559.69
23.78	7557.8
23.79	7555.92
23.8	7554.06
23.81	7552.2
23.82	7550.35
23.83	7548.5
23.84	7546.66
23.85	7544.83
23.86	7543
23.87	7541.18
23.88	7539.36
23.89	7537.54
23.9	7535.73
23.91	7533.92
23.92	7532.11
23.93	7530.3
23.94	7528.49
23.95	7526.69
23.96	7524.88
23.97	7523.07
23.98	7521.26
23.99	7519.45
24	7517.64
24.01	7515.82
24.02	7514
24.03	7512.18
24.04	7510.35
24.05	7508.51
24.06	7506.67
24.07	7504.82
24.08	7502.97
24.09	7501.11
24.1	7499.24
24.11	7497.36
24.12	7495.47
24.13	7493.57
24.14	7491.67
24.15	7489.75
24.16	7487.82
24.17	7485.87
24.18	7483.92
24.19	7481.95
24.2	7479.97
24.21	7477.97
24.22	7475.96
24.23	7473.94
24.24	7471.9
24.25	7469.84
24.26	7467.76
24.27	7465.67
24.28	7463.56
24.29	7461.43
24.3	7459.28
24.31	7457.11
24.32	7454.92
24.33	7452.71
24.34	7450.48
24.35	7448.23
24.36	7445.95
24.37	7443.65
24.38	7441.33
24.39	7438.98
24.4	7436.61
24.41	7434.22
24.42	7431.79
24.43	7429.34
24.44	7426.87
24.45	7424.36
24.46	7421.83
24.47	7419.27
24.48	7416.68
24.49	7414.06
24.5	7411.41
24.51	7408.73
24.52	7406.02
24.53	7403.28
24.54	7400.5
24.55	7397.69
24.56	7394.85
24.57	7391.97
24.58	7389.06
24.59	7386.11
24.6	7383.13
24.61	7380.11
24.62	7377.06
24.63	7373.96
24.64	7370.83
24.65	7367.66
24.66	7364.45
24.67	7361.2
24.68	7357.91
24.69	7354.58
24.7	7351.21
24.71	7347.79
24.72	7344.34
24.73	7340.84
24.74	7337.3
24.75	7333.71
24.76	7330.08
24.77	7326.4
24.78	7322.68
24.79	7318.91
24.8	7315.09
24.81	7311.23
24.82	7307.31
24.83	7303.35
24.84	7299.34
24.85	7295.28
24.86	7291.18
24.87	7287.02
24.88	7282.8
24.89	7278.54
24.9	7274.22
24.91	7269.85
24.92	7265.43
24.93	7260.95
24.94	7256.42
24.95	7251.84
24.96	7247.19
24.97	7242.49
[truncated: 2,503 more rows]

## Sheet: CoFC
CoFC
2θ - °	Intensity - counts
3	5980.03
3.01	5909.44
3.02	5839.63
3.03	5770.59
3.04	5702.32
3.05	5634.82
3.06	5568.07
3.07	5502.08
3.08	5436.84
3.09	5372.35
3.1	5308.6
3.11	5245.59
3.12	5183.31
3.13	5121.77
3.14	5060.94
3.15	5000.84
3.16	4941.46
3.17	4882.78
3.18	4824.82
3.19	4767.56
3.2	4711
3.21	4655.13
3.22	4599.96
3.23	4545.47
3.24	4491.66
3.25	4438.53
3.26	4386.08
3.27	4334.29
3.28	4283.17
3.29	4232.72
3.3	4182.91
3.31	4133.76
3.32	4085.26
3.33	4037.4
3.34	3990.18
3.35	3943.6
3.36	3897.64
3.37	3852.31
3.38	3807.61
3.39	3763.52
3.4	3720.05
3.41	3677.18
3.42	3634.92
3.43	3593.28
3.44	3552.28
3.45	3511.91
3.46	3472.21
3.47	3433.17
3.48	3394.82
3.49	3357.17
3.5	3320.23
3.51	3284.01
3.52	3248.53
3.53	3213.8
3.54	3179.84
3.55	3146.65
3.56	3114.25
3.57	3082.66
3.58	3051.88
3.59	3021.94
3.6	2992.83
3.61	2964.59
3.62	2937.21
3.63	2910.72
3.64	2885.12
3.65	2860.42
3.66	2836.53
3.67	2813.37
3.68	2790.84
3.69	2768.86
3.7	2747.33
3.71	2726.16
3.72	2705.26
3.73	2684.54
3.74	2663.9
3.75	2643.25
3.76	2622.51
3.77	2601.58
3.78	2580.36
3.79	2558.78
3.8	2536.73
3.81	2514.12
3.82	2490.86
3.83	2466.87
3.84	2442.05
3.85	2416.3
3.86	2389.54
3.87	2361.67
3.88	2332.65
3.89	2302.6
3.9	2271.68
3.91	2240.07
3.92	2207.93
3.93	2175.43
3.94	2142.74
3.95	2110.01
3.96	2077.43
3.97	2045.15
3.98	2013.35
3.99	1982.19
4	1951.84
4.01	1922.46
4.02	1894.22
4.03	1867.29
4.04	1841.84
4.05	1818.03
4.06	1796.03
4.07	1775.95
4.08	1757.6
4.09	1740.77
4.1	1725.22
4.11	1710.72
4.12	1697.03
4.13	1683.92
4.14	1671.16
4.15	1658.52
4.16	1645.76
4.17	1632.65
4.18	1618.95
4.19	1604.44
4.2	1588.89
4.21	1572.13
4.22	1554.34
4.23	1535.77
4.24	1516.66
4.25	1497.26
4.26	1477.83
4.27	1458.6
4.28	1439.83
4.29	1421.76
4.3	1404.64
4.31	1388.73
4.32	1374.27
4.33	1361.5
4.34	1350.68
4.35	1341.98
4.36	1335.29
4.37	1330.4
4.38	1327.14
4.39	1325.31
4.4	1324.72
4.41	1325.18
4.42	1326.5
4.43	1328.49
4.44	1330.96
4.45	1333.72
4.46	1336.58
4.47	1339.34
4.48	1341.82
4.49	1343.86
4.5	1345.46
4.51	1346.66
4.52	1347.47
4.53	1347.95
4.54	1348.11
4.55	1347.99
4.56	1347.63
4.57	1347.06
4.58	1346.31
4.59	1345.41
4.6	1344.4
4.61	1343.31
4.62	1342.16
4.63	1341.01
4.64	1339.86
4.65	1338.77
4.66	1337.76
4.67	1336.82
4.68	1335.96
4.69	1335.18
4.7	1334.47
4.71	1333.83
4.72	1333.26
4.73	1332.75
4.74	1332.3
4.75	1331.92
4.76	1331.6
4.77	1331.33
4.78	1331.11
4.79	1330.94
4.8	1330.83
4.81	1330.76
4.82	1330.73
4.83	1330.74
4.84	1330.79
4.85	1330.88
4.86	1331.01
4.87	1331.16
4.88	1331.35
4.89	1331.56
4.9	1331.79
4.91	1332.05
4.92	1332.33
4.93	1332.62
4.94	1332.93
4.95	1333.17
4.96	1333.31
4.97	1333.36
4.98	1333.36
4.99	1333.33
5	1333.31
5.01	1333.31
5.02	1333.35
5.03	1333.45
5.04	1333.61
5.05	1333.87
5.06	1334.2
5.07	1334.64
5.08	1335.17
5.09	1335.8
5.1	1336.5
5.11	1337.28
5.12	1338.12
5.13	1338.97
5.14	1339.84
5.15	1340.7
5.16	1341.57
5.17	1342.44
5.18	1343.31
5.19	1344.19
5.2	1345.07
5.21	1345.95
5.22	1346.83
5.23	1347.72
5.24	1348.61
5.25	1349.5
5.26	1350.4
5.27	1351.3
5.28	1352.2
5.29	1353.1
5.3	1354.01
5.31	1354.92
5.32	1355.84
5.33	1356.76
5.34	1357.68
5.35	1358.6
5.36	1359.53
5.37	1360.46
5.38	1361.4
5.39	1362.34
5.4	1363.28
5.41	1364.23
5.42	1365.18
5.43	1366.13
5.44	1367.09
5.45	1368.05
5.46	1369.02
5.47	1369.98
5.48	1370.96
5.49	1371.93
5.5	1372.91
5.51	1373.9
5.52	1374.89
5.53	1375.88
5.54	1376.88
5.55	1377.88
5.56	1378.89
5.57	1379.9
5.58	1380.91
5.59	1381.93
5.6	1382.96
5.61	1383.98
5.62	1385.02
5.63	1386.05
5.64	1387.1
5.65	1388.14
5.66	1389.19
5.67	1390.25
5.68	1391.31
5.69	1392.38
5.7	1393.45
5.71	1394.52
5.72	1395.6
5.73	1396.69
5.74	1397.78
5.75	1398.87
5.76	1399.97
5.77	1401.08
5.78	1402.19
5.79	1403.3
5.8	1404.42
5.81	1405.55
5.82	1406.68
5.83	1407.82
5.84	1408.96
5.85	1410.11
5.86	1411.26
5.87	1412.42
5.88	1413.59
5.89	1414.76
5.9	1415.93
5.91	1417.12
5.92	1418.3
5.93	1419.5
5.94	1420.69
5.95	1421.9
5.96	1423.11
5.97	1424.33
5.98	1425.55
5.99	1426.78
6	1428.02
6.01	1429.26
6.02	1430.5
6.03	1431.76
6.04	1433.02
6.05	1434.28
6.06	1435.56
6.07	1436.83
6.08	1438.12
6.09	1439.41
6.1	1440.71
6.11	1442.01
6.12	1443.33
6.13	1444.64
6.14	1445.97
6.15	1447.3
6.16	1448.64
6.17	1449.98
6.18	1451.33
6.19	1452.69
6.2	1454.06
6.21	1455.43
6.22	1456.81
6.23	1458.2
6.24	1459.59
6.25	1460.99
6.26	1462.4
6.27	1463.81
6.28	1465.23
6.29	1466.66
6.3	1468.1
6.31	1469.55
6.32	1471
6.33	1472.46
6.34	1473.92
6.35	1475.4
6.36	1476.88
6.37	1478.37
6.38	1479.87
6.39	1481.37
6.4	1482.88
6.41	1484.4
6.42	1485.93
6.43	1487.47
6.44	1489.01
6.45	1490.56
6.46	1492.12
6.47	1493.69
6.48	1495.27
6.49	1496.85
6.5	1498.44
6.51	1500.04
6.52	1501.65
6.53	1503.27
6.54	1504.89
6.55	1506.53
6.56	1508.17
6.57	1509.82
6.58	1511.48
6.59	1513.14
6.6	1514.82
6.61	1516.51
6.62	1518.2
6.63	1519.9
6.64	1521.61
6.65	1523.33
6.66	1525.06
6.67	1526.8
6.68	1528.54
6.69	1530.3
6.7	1532.06
6.71	1533.83
6.72	1535.62
6.73	1537.41
6.74	1539.21
6.75	1541.02
6.76	1542.84
6.77	1544.66
6.78	1546.5
6.79	1548.35
6.8	1550.2
6.81	1552.07
6.82	1553.94
6.83	1555.83
6.84	1557.72
6.85	1559.62
6.86	1561.54
6.87	1563.46
6.88	1565.39
6.89	1567.34
6.9	1569.29
6.91	1571.25
6.92	1573.22
6.93	1575.2
6.94	1577.19
6.95	1579.2
6.96	1581.21
6.97	1583.23
6.98	1585.26
6.99	1587.31
7	1589.36
7.01	1591.38
7.02	1593.35
7.03	1595.24
7.04	1597.05
7.05	1598.76
7.06	1600.36
7.07	1601.87
7.08	1603.27
7.09	1604.58
7.1	1605.82
7.11	1607
7.12	1608.15
7.13	1609.29
7.14	1610.45
7.15	1611.67
7.16	1613
7.17	1614.48
7.18	1616.05
7.19	1617.63
7.2	1619.22
7.21	1620.82
7.22	1622.43
7.23	1624.05
7.24	1625.68
7.25	1627.32
7.26	1628.97
7.27	1630.63
7.28	1632.29
7.29	1633.97
7.3	1635.65
7.31	1637.35
7.32	1639.05
7.33	1640.76
7.34	1642.47
7.35	1644.2
7.36	1645.93
7.37	1647.67
7.38	1649.42
7.39	1651.17
7.4	1652.94
7.41	1654.71
7.42	1656.48
7.43	1658.27
7.44	1660.06
7.45	1661.86
7.46	1663.66
7.47	1665.47
7.48	1667.29
7.49	1669.11
7.5	1670.94
7.51	1672.78
7.52	1674.62
7.53	1676.46
7.54	1678.32
7.55	1680.17
7.56	1682.04
7.57	1683.9
7.58	1685.78
7.59	1687.66
7.6	1689.54
7.61	1691.43
7.62	1693.32
7.63	1695.21
7.64	1697.11
7.65	1699.02
7.66	1700.93
7.67	1702.84
7.68	1704.75
7.69	1706.67
7.7	1708.6
7.71	1710.52
7.72	1712.45
7.73	1714.38
7.74	1716.32
7.75	1718.26
7.76	1720.2
7.77	1722.14
7.78	1724.09
7.79	1726.03
7.8	1727.98
7.81	1729.93
7.82	1731.89
7.83	1733.84
7.84	1735.8
7.85	1737.76
7.86	1739.72
7.87	1741.68
7.88	1743.64
7.89	1745.61
7.9	1747.57
7.91	1749.54
7.92	1751.5
7.93	1753.47
7.94	1755.43
7.95	1757.4
7.96	1759.37
7.97	1761.33
7.98	1763.3
7.99	1765.26
8	1767.23
8.01	1769.19
8.02	1771.16
8.03	1773.12
8.04	1775.08
8.05	1777.04
8.06	1779
8.07	1780.96
8.08	1782.92
8.09	1784.87
8.1	1786.83
8.11	1788.78
8.12	1790.73
8.13	1792.67
8.14	1794.62
8.15	1796.56
8.16	1798.5
8.17	1800.44
8.18	1802.37
8.19	1804.3
8.2	1806.23
8.21	1808.16
8.22	1810.08
8.23	1812
8.24	1813.91
8.25	1815.82
8.26	1817.73
8.27	1819.63
8.28	1821.53
8.29	1823.43
8.3	1825.32
8.31	1827.2
8.32	1829.08
8.33	1830.96
8.34	1832.83
8.35	1834.7
8.36	1836.56
8.37	1838.42
8.38	1840.27
8.39	1842.11
8.4	1843.95
8.41	1845.79
8.42	1847.61
8.43	1849.43
8.44	1851.25
8.45	1853.06
8.46	1854.86
8.47	1856.66
8.48	1858.45
8.49	1860.23
8.5	1862
8.51	1863.77
8.52	1865.53
8.53	1867.29
8.54	1869.03
8.55	1870.77
8.56	1872.5
8.57	1874.22
8.58	1875.94
8.59	1877.65
8.6	1879.34
8.61	1881.03
8.62	1882.71
8.63	1884.39
8.64	1886.05
8.65	1887.71
8.66	1889.35
8.67	1890.99
8.68	1892.62
8.69	1894.23
8.7	1895.84
8.71	1897.44
8.72	1899.03
8.73	1900.61
8.74	1902.18
8.75	1903.73
8.76	1905.28
8.77	1906.82
8.78	1908.35
8.79	1909.86
8.8	1911.37
8.81	1912.86
8.82	1914.35
8.83	1915.82
8.84	1917.28
8.85	1918.73
8.86	1920.16
8.87	1921.59
8.88	1923
8.89	1924.4
8.9	1925.79
8.91	1927.17
8.92	1928.53
8.93	1929.88
8.94	1931.22
8.95	1932.55
8.96	1933.86
8.97	1935.16
8.98	1936.45
8.99	1937.72
9	1938.98
9.01	1940.23
9.02	1941.46
9.03	1942.75
9.04	1944.18
9.05	1945.74
9.06	1947.43
9.07	1949.25
9.08	1951.18
9.09	1953.23
9.1	1955.38
9.11	1957.62
9.12	1959.93
9.13	1962.29
9.14	1964.69
9.15	1967.09
9.16	1969.47
9.17	1971.8
9.18	1974.03
9.19	1976.12
9.2	1978.04
9.21	1979.71
9.22	1981.25
9.23	1982.79
9.24	1984.33
9.25	1985.87
9.26	1987.4
9.27	1988.94
9.28	1990.47
9.29	1992.01
9.3	1993.55
9.31	1995.08
9.32	1996.61
9.33	1998.15
9.34	1999.68
9.35	2001.21
9.36	2002.75
9.37	2004.28
9.38	2005.81
9.39	2007.34
9.4	2008.87
9.41	2010.4
9.42	2011.93
9.43	2013.45
9.44	2014.98
9.45	2016.51
9.46	2018.04
9.47	2019.56
9.48	2021.09
9.49	2022.61
9.5	2024.13
9.51	2025.66
9.52	2027.18
9.53	2028.7
9.54	2030.22
9.55	2031.74
9.56	2033.26
9.57	2034.78
9.58	2036.3
9.59	2037.82
9.6	2039.34
9.61	2040.85
9.62	2042.37
9.63	2043.88
9.64	2045.4
9.65	2046.91
9.66	2048.42
9.67	2049.93
9.68	2051.44
9.69	2052.95
9.7	2054.46
9.71	2055.97
9.72	2057.48
9.73	2058.99
9.74	2060.49
9.75	2062
9.76	2063.5
9.77	2065.01
9.78	2066.51
9.79	2068.01
9.8	2069.51
9.81	2071.01
9.82	2072.51
9.83	2074.01
9.84	2075.51
9.85	2077.01
9.86	2078.5
9.87	2080
9.88	2081.49
9.89	2082.98
9.9	2084.48
9.91	2085.97
9.92	2087.46
9.93	2088.95
9.94	2090.44
9.95	2091.92
9.96	2093.41
9.97	2094.89
9.98	2096.38
9.99	2097.86
10	2099.35
10.01	2100.83
10.02	2102.31
10.03	2103.79
10.04	2105.27
10.05	2106.74
10.06	2108.22
10.07	2109.7
10.08	2111.17
10.09	2112.64
10.1	2114.11
10.11	2115.59
10.12	2117.05
10.13	2118.52
10.14	2119.99
10.15	2121.46
10.16	2122.92
10.17	2124.39
10.18	2125.85
10.19	2127.31
10.2	2128.77
10.21	2130.23
10.22	2131.69
10.23	2133.15
10.24	2134.61
10.25	2136.06
10.26	2137.51
10.27	2138.97
10.28	2140.42
10.29	2141.87
10.3	2143.32
10.31	2144.77
10.32	2146.21
10.33	2147.66
10.34	2149.1
10.35	2150.54
10.36	2151.99
10.37	2153.43
10.38	2154.86
10.39	2156.3
10.4	2157.74
10.41	2159.17
10.42	2160.61
10.43	2162.04
10.44	2163.47
10.45	2164.9
10.46	2166.33
10.47	2167.76
10.48	2169.18
10.49	2170.61
10.5	2172.03
10.51	2173.45
10.52	2174.87
10.53	2176.29
10.54	2177.71
10.55	2179.12
10.56	2180.54
10.57	2181.95
10.58	2183.36
10.59	2184.78
10.6	2186.18
10.61	2187.59
10.62	2189
10.63	2190.4
10.64	2191.8
10.65	2193.21
10.66	2194.61
10.67	2196.01
10.68	2197.4
10.69	2198.8
10.7	2200.19
10.71	2201.59
10.72	2202.98
10.73	2204.37
10.74	2205.75
10.75	2207.14
10.76	2208.53
10.77	2209.91
10.78	2211.29
10.79	2212.67
10.8	2214.05
10.81	2215.43
10.82	2216.8
10.83	2218.18
10.84	2219.55
10.85	2220.92
10.86	2222.29
10.87	2223.66
10.88	2225.02
10.89	2226.39
10.9	2227.75
10.91	2229.11
10.92	2230.47
10.93	2231.82
10.94	2233.18
10.95	2234.53
10.96	2235.89
10.97	2237.24
10.98	2238.59
10.99	2239.93
11	2241.28
11.01	2242.62
11.02	2243.96
11.03	2245.3
11.04	2246.64
11.05	2247.98
11.06	2249.31
11.07	2250.69
11.08	2252.18
11.09	2253.77
11.1	2255.49
11.11	2257.34
11.12	2259.31
11.13	2261.41
11.14	2263.62
11.15	2265.94
11.16	2268.34
11.17	2270.82
11.18	2273.35
11.19	2275.9
11.2	2278.44
11.21	2280.95
11.22	2283.38
11.23	2285.69
11.24	2287.84
11.25	2289.78
11.26	2291.6
11.27	2293.42
11.28	2295.23
11.29	2297.04
11.3	2298.85
11.31	2300.66
11.32	2302.47
11.33	2304.27
11.34	2306.07
11.35	2307.87
11.36	2309.66
11.37	2311.45
11.38	2313.25
11.39	2315.03
11.4	2316.82
11.41	2318.61
11.42	2320.39
11.43	2322.17
11.44	2323.95
11.45	2325.72
11.46	2327.49
11.47	2329.27
11.48	2331.03
11.49	2332.8
11.5	2334.57
11.51	2336.33
11.52	2338.09
11.53	2339.85
11.54	2341.61
11.55	2343.37
11.56	2345.12
11.57	2346.88
11.58	2348.63
11.59	2350.38
11.6	2352.12
11.61	2353.87
11.62	2355.61
11.63	2357.36
11.64	2359.1
11.65	2360.84
11.66	2362.58
11.67	2364.31
11.68	2366.05
11.69	2367.78
11.7	2369.51
11.71	2371.24
11.72	2372.97
11.73	2374.7
11.74	2376.43
11.75	2378.16
11.76	2379.88
11.77	2381.6
11.78	2383.32
11.79	2385.05
11.8	2386.76
11.81	2388.48
11.82	2390.2
11.83	2391.92
11.84	2393.63
11.85	2395.35
11.86	2397.06
11.87	2398.77
11.88	2400.48
11.89	2402.2
11.9	2403.9
11.91	2405.61
11.92	2407.32
11.93	2409.03
11.94	2410.74
11.95	2412.44
11.96	2414.15
11.97	2415.85
11.98	2417.55
11.99	2419.26
12	2420.96
12.01	2422.66
12.02	2424.36
12.03	2426.06
12.04	2427.76
12.05	2429.46
12.06	2431.16
12.07	2432.86
12.08	2434.56
12.09	2436.26
12.1	2437.95
12.11	2439.65
12.12	2441.35
12.13	2443.05
12.14	2444.74
12.15	2446.44
12.16	2448.14
12.17	2449.83
12.18	2451.53
12.19	2453.22
12.2	2454.92
12.21	2456.62
12.22	2458.31
12.23	2460.01
12.24	2461.7
12.25	2463.4
12.26	2465.1
12.27	2466.79
12.28	2468.49
12.29	2470.19
12.3	2471.88
12.31	2473.58
12.32	2475.28
12.33	2476.97
12.34	2478.67
12.35	2480.37
12.36	2482.07
12.37	2483.77
12.38	2485.47
12.39	2487.17
12.4	2488.87
12.41	2490.57
12.42	2492.27
12.43	2493.97
12.44	2495.67
12.45	2497.38
12.46	2499.08
12.47	2500.78
12.48	2502.49
12.49	2504.2
12.5	2505.9
12.51	2507.61
12.52	2509.32
12.53	2511.03
12.54	2512.74
12.55	2514.45
12.56	2516.16
12.57	2517.87
12.58	2519.58
12.59	2521.3
12.6	2523.01
12.61	2524.73
12.62	2526.45
12.63	2528.16
12.64	2529.88
12.65	2531.6
12.66	2533.33
12.67	2535.05
12.68	2536.77
12.69	2538.5
12.7	2540.23
12.71	2541.95
12.72	2543.68
12.73	2545.41
12.74	2547.15
12.75	2548.88
12.76	2550.62
12.77	2552.35
12.78	2554.09
12.79	2555.83
12.8	2557.57
12.81	2559.31
12.82	2561.06
12.83	2562.8
12.84	2564.55
12.85	2566.3
12.86	2568.05
12.87	2569.8
12.88	2571.56
12.89	2573.32
12.9	2575.07
12.91	2576.83
12.92	2578.6
12.93	2580.36
12.94	2582.12
12.95	2583.89
12.96	2585.66
12.97	2587.43
12.98	2589.21
12.99	2590.98
13	2592.76
13.01	2594.54
13.02	2596.32
13.03	2598.11
13.04	2599.89
13.05	2601.68
13.06	2603.47
13.07	2605.27
13.08	2607.06
13.09	2608.86
13.1	2610.66
13.11	2612.54
13.12	2614.57
13.13	2616.73
13.14	2619
13.15	2621.37
13.16	2623.81
13.17	2626.3
13.18	2628.82
13.19	2631.37
13.2	2633.91
13.21	2636.43
13.22	2638.91
13.23	2641.33
13.24	2643.68
13.25	2645.95
13.26	2648.11
13.27	2650.17
13.28	2652.09
13.29	2653.88
13.3	2655.59
13.31	2657.31
13.32	2659.01
13.33	2660.72
13.34	2662.42
13.35	2664.12
13.36	2665.82
13.37	2667.51
13.38	2669.21
13.39	2670.9
13.4	2672.58
13.41	2674.27
13.42	2675.95
13.43	2677.63
13.44	2679.31
13.45	2680.99
13.46	2682.66
13.47	2684.34
13.48	2686.01
13.49	2687.68
13.5	2689.35
13.51	2691.01
13.52	2692.68
13.53	2694.35
13.54	2696.01
13.55	2697.68
13.56	2699.34
13.57	2701
13.58	2702.67
13.59	2704.33
13.6	2705.99
13.61	2707.65
13.62	2709.32
13.63	2710.98
13.64	2712.64
13.65	2714.3
13.66	2715.97
13.67	2717.63
13.68	2719.29
13.69	2720.96
13.7	2722.62
13.71	2724.29
13.72	2725.96
13.73	2727.63
13.74	2729.3
13.75	2730.97
13.76	2732.64
13.77	2734.32
13.78	2735.99
13.79	2737.67
13.8	2739.35
13.81	2741.03
13.82	2742.72
13.83	2744.41
13.84	2746.09
13.85	2747.78
13.86	2749.48
13.87	2751.18
13.88	2752.88
13.89	2754.58
13.9	2756.28
13.91	2757.99
13.92	2759.7
13.93	2761.42
13.94	2763.14
13.95	2764.86
13.96	2766.58
13.97	2768.31
13.98	2770.05
13.99	2771.78
14	2773.52
14.01	2775.27
14.02	2777.02
14.03	2778.77
14.04	2780.53
14.05	2782.29
14.06	2784.06
14.07	2785.83
14.08	2787.61
14.09	2789.39
14.1	2791.18
14.11	2792.97
14.12	2794.77
14.13	2796.57
14.14	2798.39
14.15	2800.2
14.16	2802.02
14.17	2803.85
14.18	2805.68
14.19	2807.52
14.2	2809.36
14.21	2811.21
14.22	2813.07
14.23	2814.93
14.24	2816.8
14.25	2818.68
14.26	2820.57
14.27	2822.46
14.28	2824.36
14.29	2826.26
14.3	2828.18
14.31	2830.09
14.32	2832.02
14.33	2833.96
14.34	2835.9
14.35	2837.85
14.36	2839.81
14.37	2841.78
14.38	2843.75
14.39	2845.73
14.4	2847.73
14.41	2849.73
14.42	2851.73
14.43	2853.75
14.44	2855.78
14.45	2857.81
14.46	2859.86
14.47	2861.91
14.48	2863.97
14.49	2866.04
14.5	2868.12
14.51	2870.21
14.52	2872.31
14.53	2874.42
14.54	2876.54
14.55	2878.67
14.56	2880.81
14.57	2882.96
14.58	2885.12
14.59	2887.29
14.6	2889.47
14.61	2891.66
14.62	2893.86
14.63	2896.08
14.64	2898.3
14.65	2900.54
14.66	2902.78
14.67	2905.04
14.68	2907.31
14.69	2909.59
14.7	2911.88
14.71	2914.18
14.72	2916.5
14.73	2918.82
14.74	2921.16
14.75	2923.51
14.76	2925.88
14.77	2928.25
14.78	2930.64
14.79	2933.04
14.8	2935.45
14.81	2937.88
14.82	2940.32
14.83	2942.77
14.84	2945.24
14.85	2947.71
14.86	2950.2
14.87	2952.71
14.88	2955.23
14.89	2957.76
14.9	2960.3
14.91	2962.86
14.92	2965.44
14.93	2968.02
14.94	2970.62
14.95	2973.24
14.96	2975.87
14.97	2978.51
14.98	2981.17
14.99	2983.85
15	2986.54
15.01	2989.24
15.02	2991.96
15.03	2994.69
15.04	2997.44
15.05	3000.2
15.06	3002.98
15.07	3005.78
15.08	3008.59
15.09	3011.41
15.1	3014.26
15.11	3017.11
15.12	3019.99
15.13	3022.88
15.14	3025.78
15.15	3028.8
15.16	3031.97
15.17	3035.24
15.18	3038.55
15.19	3041.86
15.2	3045.12
15.21	3048.3
15.22	3051.39
15.23	3054.35
15.24	3057.19
15.25	3059.89
15.26	3062.45
15.27	3064.89
15.28	3067.23
15.29	3069.47
15.3	3071.66
15.31	3073.83
15.32	3076.01
15.33	3078.26
15.34	3080.57
15.35	3082.9
15.36	3085.25
15.37	3087.62
15.38	3090.01
15.39	3092.42
15.4	3094.85
15.41	3097.29
15.42	3099.76
15.43	3102.25
15.44	3104.75
15.45	3107.28
15.46	3109.82
15.47	3112.38
15.48	3114.95
15.49	3117.55
15.5	3120.17
15.51	3122.8
15.52	3125.45
15.53	3128.11
15.54	3130.8
15.55	3133.5
15.56	3136.22
15.57	3138.95
15.58	3141.71
15.59	3144.47
15.6	3147.26
15.61	3150.06
15.62	3152.88
15.63	3155.71
15.64	3158.56
15.65	3161.43
15.66	3164.3
15.67	3167.2
15.68	3170.11
15.69	3173.04
15.7	3175.98
15.71	3178.93
15.72	3181.9
15.73	3184.89
15.74	3187.88
15.75	3190.9
15.76	3193.92
15.77	3196.96
15.78	3200.02
15.79	3203.08
15.8	3206.16
15.81	3209.26
15.82	3212.36
15.83	3215.48
15.84	3218.62
15.85	3221.76
15.86	3224.92
15.87	3228.09
15.88	3231.27
15.89	3234.46
15.9	3237.67
15.91	3240.89
15.92	3244.11
15.93	3247.36
15.94	3250.61
15.95	3253.87
15.96	3257.14
15.97	3260.43
15.98	3263.72
15.99	3267.03
16	3270.34
16.01	3273.67
16.02	3277
16.03	3280.35
16.04	3283.7
16.05	3287.07
16.06	3290.44
16.07	3293.82
16.08	3297.22
16.09	3300.62
16.1	3304.03
16.11	3307.45
16.12	3310.87
16.13	3314.31
16.14	3317.75
16.15	3321.2
16.16	3324.66
16.17	3328.13
16.18	3331.61
16.19	3335.09
16.2	3338.58
16.21	3342.07
16.22	3345.58
16.23	3349.09
16.24	3352.61
16.25	3356.13
16.26	3359.66
16.27	3363.2
16.28	3366.74
16.29	3370.29
16.3	3373.84
16.31	3377.4
16.32	3380.96
16.33	3384.53
16.34	3388.11
16.35	3391.69
16.36	3395.28
16.37	3398.86
16.38	3402.46
16.39	3406.06
16.4	3409.66
16.41	3413.27
16.42	3416.88
16.43	3420.49
16.44	3424.11
16.45	3427.73
16.46	3431.36
16.47	3434.99
16.48	3438.62
16.49	3442.25
16.5	3445.89
16.51	3449.53
16.52	3453.17
16.53	3456.81
16.54	3460.46
16.55	3464.11
16.56	3467.76
16.57	3471.41
16.58	3475.06
16.59	3478.72
16.6	3482.37
16.61	3486.03
16.62	3489.69
16.63	3493.34
16.64	3497
16.65	3500.66
16.66	3504.32
16.67	3507.98
16.68	3511.64
16.69	3515.3
16.7	3518.96
16.71	3522.62
16.72	3526.28
16.73	3529.93
16.74	3533.59
16.75	3537.25
16.76	3540.9
16.77	3544.55
16.78	3548.2
16.79	3551.85
16.8	3555.5
16.81	3559.15
16.82	3562.79
16.83	3566.43
16.84	3570.07
16.85	3573.7
16.86	3577.34
16.87	3580.97
16.88	3584.6
16.89	3588.22
16.9	3591.84
16.91	3595.46
16.92	3599.07
16.93	3602.68
16.94	3606.29
16.95	3609.89
16.96	3613.49
16.97	3617.08
16.98	3620.67
16.99	3624.25
17	3627.83
17.01	3631.4
17.02	3634.97
17.03	3638.53
17.04	3642.09
17.05	3645.64
17.06	3649.19
17.07	3652.73
17.08	3656.26
17.09	3659.79
17.1	3663.31
17.11	3666.83
17.12	3670.34
17.13	3673.84
17.14	3677.33
17.15	3680.82
17.16	3684.3
17.17	3687.77
17.18	3691.24
17.19	3694.58
17.2	3697.72
17.21	3700.76
17.22	3703.74
17.23	3706.74
17.24	3709.79
17.25	3712.94
17.26	3716.22
17.27	3719.66
17.28	3723.27
17.29	3727.06
17.3	3731.03
17.31	3735.16
17.32	3739.45
17.33	3743.87
17.34	3748.38
17.35	3752.94
17.36	3757.51
17.37	3762.02
17.38	3766.47
17.39	3770.92
17.4	3775.35
17.41	3779.78
17.42	3784.19
17.43	3788.59
17.44	3792.99
17.45	3797.37
17.46	3801.74
17.47	3806.1
17.48	3810.45
17.49	3814.79
17.5	3819.12
17.51	3823.43
17.52	3827.74
17.53	3832.04
17.54	3836.33
17.55	3840.61
17.56	3844.88
17.57	3849.13
17.58	3853.38
17.59	3857.62
17.6	3861.85
17.61	3866.07
17.62	3870.27
17.63	3874.47
17.64	3878.66
17.65	3882.84
17.66	3887.01
17.67	3891.17
17.68	3895.32
17.69	3899.46
17.7	3903.59
17.71	3907.71
17.72	3911.82
17.73	3915.92
17.74	3920.01
17.75	3924.1
17.76	3928.17
17.77	3932.24
17.78	3936.29
17.79	3940.34
17.8	3944.38
17.81	3948.4
17.82	3952.42
17.83	3956.43
17.84	3960.43
17.85	3964.43
17.86	3968.41
17.87	3972.38
17.88	3976.35
17.89	3980.3
17.9	3984.25
17.91	3988.19
17.92	3992.12
17.93	3996.04
17.94	3999.95
17.95	4003.86
17.96	4007.76
17.97	4011.64
17.98	4015.52
17.99	4019.39
18	4023.25
18.01	4027.11
18.02	4030.95
18.03	4034.79
18.04	4038.62
18.05	4042.44
18.06	4046.25
18.07	4050.06
18.08	4053.85
18.09	4057.64
18.1	4061.42
18.11	4065.2
18.12	4068.96
18.13	4072.72
18.14	4076.47
18.15	4080.21
18.16	4083.94
18.17	4087.67
18.18	4091.39
18.19	4095.09
18.2	4098.8
18.21	4102.49
18.22	4106.18
18.23	4109.86
18.24	4113.53
18.25	4117.2
18.26	4120.86
18.27	4124.51
18.28	4128.15
18.29	4131.79
18.3	4135.42
18.31	4139.04
18.32	4142.66
18.33	4146.26
18.34	4149.86
18.35	4153.46
18.36	4157.05
18.37	4160.62
18.38	4164.2
18.39	4167.76
18.4	4171.32
18.41	4174.88
18.42	4178.42
18.43	4181.96
18.44	4185.49
18.45	4189.02
18.46	4192.54
18.47	4196.05
18.48	4199.56
18.49	4203.06
18.5	4206.55
18.51	4210.04
18.52	4213.52
18.53	4217
18.54	4220.46
18.55	4223.93
18.56	4227.38
18.57	4230.83
18.58	4234.28
18.59	4237.71
18.6	4241.15
18.61	4244.57
18.62	4247.99
18.63	4251.41
18.64	4254.81
18.65	4258.22
18.66	4261.61
18.67	4265
18.68	4268.39
18.69	4271.77
18.7	4275.14
18.71	4278.51
18.72	4281.87
18.73	4285.23
18.74	4288.58
18.75	4291.93
18.76	4295.27
18.77	4298.6
18.78	4301.94
18.79	4305.26
18.8	4308.58
18.81	4311.9
18.82	4315.2
18.83	4318.51
18.84	4321.81
18.85	4325.1
18.86	4328.39
18.87	4331.68
18.88	4334.96
18.89	4338.23
18.9	4341.5
18.91	4344.77
18.92	4348.03
18.93	4351.28
18.94	4354.53
18.95	4357.78
18.96	4361.02
18.97	4364.26
18.98	4367.49
18.99	4370.72
19	4373.94
19.01	4377.16
19.02	4380.38
19.03	4383.59
19.04	4386.79
19.05	4390
19.06	4393.19
19.07	4396.39
19.08	4399.58
19.09	4402.76
19.1	4405.94
19.11	4409.12
19.12	4412.3
19.13	4415.47
19.14	4418.63
19.15	4421.79
19.16	4424.95
19.17	4428.11
19.18	4431.26
19.19	4434.4
19.2	4437.55
19.21	4440.69
19.22	4443.82
19.23	4446.97
19.24	4450.09
19.25	4453.15
19.26	4456.11
19.27	4458.94
19.28	4461.63
19.29	4464.15
19.3	4466.49
19.31	4468.66
19.32	4470.65
19.33	4472.48
19.34	4474.17
19.35	4475.73
19.36	4477.22
19.37	4478.66
19.38	4480.11
19.39	4481.62
19.4	4483.26
19.41	4485.1
19.42	4487.07
19.43	4489.02
19.44	4490.96
19.45	4492.89
19.46	4494.81
19.47	4496.71
19.48	4498.61
19.49	4500.49
19.5	4502.36
19.51	4504.21
19.52	4506.06
19.53	4507.89
19.54	4509.71
19.55	4511.52
19.56	4513.31
19.57	4515.09
19.58	4516.86
19.59	4518.61
19.6	4520.35
19.61	4522.08
19.62	4523.79
19.63	4525.49
19.64	4527.18
19.65	4528.85
19.66	4530.51
19.67	4532.15
19.68	4533.78
19.69	4535.4
19.7	4537
19.71	4538.58
19.72	4540.16
19.73	4541.71
19.74	4543.25
19.75	4544.78
19.76	4546.29
19.77	4547.79
19.78	4549.27
19.79	4550.73
19.8	4552.18
19.81	4553.62
19.82	4555.03
19.83	4556.44
19.84	4557.82
19.85	4559.19
19.86	4560.54
19.87	4561.88
19.88	4563.2
19.89	4564.5
19.9	4565.79
19.91	4567.06
19.92	4568.31
19.93	4569.54
19.94	4570.76
19.95	4571.96
19.96	4573.15
19.97	4574.31
19.98	4575.46
19.99	4576.59
20	4577.7
20.01	4578.79
20.02	4579.87
20.03	4580.93
20.04	4581.97
20.05	4582.98
20.06	4583.99
20.07	4584.97
20.08	4585.93
20.09	4586.88
20.1	4587.8
20.11	4588.71
20.12	4589.6
20.13	4590.47
20.14	4591.31
20.15	4592.14
20.16	4592.95
20.17	4593.74
20.18	4594.51
20.19	4595.26
20.2	4595.98
20.21	4596.69
20.22	4597.38
20.23	4598.05
20.24	4598.69
20.25	4599.32
20.26	4599.92
20.27	4600.5
20.28	4601.07
20.29	4601.61
20.3	4602.13
20.31	4602.62
20.32	4603.1
20.33	4603.55
20.34	4603.99
20.35	4604.4
20.36	4604.79
20.37	4605.15
20.38	4605.49
20.39	4605.82
20.4	4606.11
20.41	4606.39
20.42	4606.65
20.43	4606.88
20.44	4607.08
20.45	4607.27
20.46	4607.43
20.47	4607.56
20.48	4607.68
20.49	4607.77
20.5	4607.84
20.51	4607.88
20.52	4607.9
20.53	4607.89
20.54	4607.86
20.55	4607.81
20.56	4607.73
20.57	4607.63
20.58	4607.5
20.59	4607.35
20.6	4607.17
20.61	4606.97
20.62	4606.74
20.63	4606.49
20.64	4606.21
20.65	4605.91
20.66	4605.58
20.67	4605.23
20.68	4604.85
20.69	4604.44
20.7	4604.01
20.71	4603.55
20.72	4603.07
20.73	4602.56
20.74	4602.02
20.75	4601.46
20.76	4600.87
20.77	4600.25
20.78	4599.6
20.79	4598.93
20.8	4598.23
20.81	4597.51
20.82	4596.76
20.83	4595.98
20.84	4595.17
20.85	4594.33
20.86	4593.47
20.87	4592.58
20.88	4591.66
20.89	4590.71
20.9	4589.73
20.91	4588.73
20.92	4587.69
20.93	4586.63
20.94	4585.54
20.95	4584.42
20.96	4583.27
20.97	4582.09
20.98	4580.89
20.99	4579.65
21	4578.38
21.01	4577.09
21.02	4575.76
21.03	4574.41
21.04	4573.02
21.05	4571.61
21.06	4570.16
21.07	4568.69
21.08	4567.18
21.09	4565.64
21.1	4564.08
21.11	4562.48
21.12	4560.85
21.13	4559.19
21.14	4557.5
21.15	4555.78
21.16	4554.02
21.17	4552.24
21.18	4550.42
21.19	4548.58
21.2	4546.7
21.21	4544.78
21.22	4542.84
21.23	4540.87
21.24	4538.86
21.25	4536.82
21.26	4534.75
21.27	4532.63
21.28	4530.5
21.29	4528.38
21.3	4526.3
21.31	4524.3
21.32	4522.4
21.33	4520.61
21.34	4518.96
21.35	4517.44
21.36	4516.07
21.37	4514.84
21.38	4513.73
21.39	4512.73
21.4	4511.81
21.41	4510.93
21.42	4510.04
21.43	4509.09
21.44	4508.01
21.45	4506.73
21.46	4505.3
21.47	4503.87
21.48	4502.44
21.49	4501
21.5	4499.56
21.51	4498.12
21.52	4496.67
21.53	4495.22
21.54	4493.76
21.55	4492.3
21.56	4490.83
21.57	4489.36
21.58	4487.88
21.59	4486.4
21.6	4484.91
21.61	4483.42
21.62	4481.93
21.63	4480.42
21.64	4478.92
21.65	4477.4
21.66	4475.89
21.67	4474.37
21.68	4472.84
21.69	4471.31
21.7	4469.77
21.71	4468.22
21.72	4466.67
21.73	4465.12
21.74	4463.56
21.75	4461.99
21.76	4460.42
21.77	4458.84
21.78	4457.25
21.79	4455.66
21.8	4454.06
21.81	4452.46
21.82	4450.85
21.83	4449.23
21.84	4447.61
21.85	4445.98
21.86	4444.34
21.87	4442.7
21.88	4441.05
21.89	4439.4
21.9	4437.73
21.91	4436.06
21.92	4434.39
21.93	4432.7
21.94	4431.01
21.95	4429.31
21.96	4427.61
21.97	4425.9
21.98	4424.18
21.99	4422.45
22	4420.71
22.01	4418.97
22.02	4417.22
22.03	4415.46
22.04	4413.7
22.05	4411.93
22.06	4410.14
22.07	4408.35
22.08	4406.56
22.09	4404.75
22.1	4402.94
22.11	4401.12
22.12	4399.29
22.13	4397.45
22.14	4395.6
22.15	4393.75
22.16	4391.89
22.17	4390.01
22.18	4388.13
22.19	4386.24
22.2	4384.35
22.21	4382.44
22.22	4380.52
22.23	4378.6
22.24	4376.66
22.25	4374.72
22.26	4372.77
22.27	4370.81
22.28	4368.83
22.29	4366.85
22.3	4364.86
22.31	4362.86
22.32	4360.86
22.33	4358.84
22.34	4356.81
22.35	4354.77
22.36	4352.72
22.37	4350.67
22.38	4348.6
22.39	4346.52
22.4	4344.43
22.41	4342.33
22.42	4340.23
22.43	4338.11
22.44	4335.98
22.45	4333.84
22.46	4331.69
22.47	4329.53
22.48	4327.36
22.49	4325.18
22.5	4322.98
22.51	4320.78
22.52	4318.57
22.53	4316.34
22.54	4314.11
22.55	4311.86
22.56	4309.6
22.57	4307.33
22.58	4305.05
22.59	4302.76
22.6	4300.46
22.61	4298.14
22.62	4295.81
22.63	4293.48
22.64	4291.13
22.65	4288.77
22.66	4286.39
22.67	4284.01
22.68	4281.61
22.69	4279.2
22.7	4276.78
22.71	4274.35
22.72	4271.9
22.73	4269.44
22.74	4266.97
22.75	4264.49
22.76	4262
22.77	4259.49
22.78	4256.97
22.79	4254.44
22.8	4251.89
22.81	4249.33
22.82	4246.76
22.83	4244.18
22.84	4241.58
22.85	4238.97
22.86	4236.35
22.87	4233.71
22.88	4231.06
22.89	4228.4
22.9	4225.73
22.91	4223.03
22.92	4220.33
22.93	4217.62
22.94	4214.89
22.95	4212.14
22.96	4209.39
22.97	4206.61
[truncated: 2,703 more rows]
