# Supplementary material for: Biochemical analysis of collagens from the bone of lizardfish (Saurida tumbil Bloch, 1795) extracted with different acids
Source: PeerJ. 2022 Mar 15;10:e13103. doi: 10.7717/peerj.13103 (PMC8932308; doi:10.7717/peerj.13103)
Supplement: Figure S5 [file peerj-10-13103-s006.xlsx]

## Sheet: AaEC
			NaCl	0	Abs	Conc. (ug/mL)	10	Abs	Conc. (ug/mL)	20	Abs	Conc. (ug/mL)	30	Abs	Conc. (ug/mL)	40	Abs	Conc. (ug/mL)	50	Abs	Conc. (ug/mL)	60	Abs	Conc. (ug/mL)
			Treatment	1	1.534	1219.67	1	1.4213	1125.75	1	1.2221	959.75	1	0.6608	492	1	0.28	174.667	1	0.3051	195.583	1	0.2199	124.583
				2	1.263	993.833	2	1.1929	935.417	2	1.3176	1039.33	2	0.636	471.333	2	0.2808	175.333	2	0.2951	187.25	2	0.2192	124
				3	1.3076	1031	3	1.2299	966.25	3	1.2278	964.5	3	0.6413	475.75	3	0.2767	171.917	3	0.2992	190.667	3	0.2199	124.583
			Mean		1.3682	1081.5		1.28137	1009.14		1.25583	987.861		0.646033	479.694		0.279167	173.972		0.2998	191.167		0.219667	124.389
			SD		0.118644	98.8698		0.100094	83.4118		0.0437376	36.448		0.0106634	8.8862		0.00177451	1.47876		0.00410447	3.42039		0.000329983	0.274986
	y=0.0012x+0.0704
				NaCl (g/L)	Conc.	Relative collagen solubility (%)	SD
	Slope:	0.0012		0	1081.5	100	2.06372
	Intercept:	0.0704		10	1009.14	93.3092	1.53195
				20	987.861	91.3418	8.92295
				30	479.694	44.3545	2.57
				40	173.972	16.0862	1.15835
				50	191.167	17.6761	1.06405
				60	124.389	11.5015	0.847389
								T1	T2	T3
		T	1	0	1219.67	100		100	95.6222	100
				10	1125.75	92.2998		92.2998	90.0016	93.7197
				20	959.75	78.6895		78.6895	100	93.55
				30	492	40.3389		40.3389	45.3496	46.1445
				40	174.667	14.3209		14.3209	16.8698	16.6747
				50	195.583	16.0358		16.0358	18.0164	18.4934
				60	124.583	10.2145		10.2145	11.9307	12.0837
		T	2	0	993.833	95.6222
				10	935.417	90.0016
				20	1039.33	100
				30	471.333	45.3496
				40	175.333	16.8698
				50	187.25	18.0164
				60	124	11.9307
		T	3	0	1031	100
				10	966.25	93.7197
				20	964.5	93.55
				30	475.75	46.1445
				40	171.917	16.6747
				50	190.667	18.4934
				60	124.583	12.0837

## Sheet: LaEC
			NaCl	0	Abs	Conc. (ug/mL)	10	Abs	Conc. (ug/mL)	20	Abs	Conc. (ug/mL)	30	Abs	Conc. (ug/mL)	40	Abs	Conc. (ug/mL)	50	Abs	Conc. (ug/mL)	60	Abs	Conc. (ug/mL)
			Treatment	1	1.7714	1417.5	1	1.4909	1183.75	1	1.3527	1068.58	1	0.5335	385.917	1	0.3368	222	1	0.2292	132.333	1	0.1214	42.5
				2	1.5752	1254	2	1.5225	1210.08	2	1.1395	890.917	2	0.5243	378.25	2	0.3316	217.667	2	0.226	129.667	2	0.1215	42.5833
				3	1.8048	1445.33	3	1.5226	1210.17	3	1.2011	942.25	3	0.5119	367.917	3	0.3296	216	3	0.2257	129.417	3	0.1215	42.5833
			Mean		1.71713	1372.28		1.512	1201.33		1.2311	967.25		0.523233	377.361		0.332667	218.556		0.226967	130.472		0.121467	42.5556
			SD		0.101284	84.4034		0.01492	12.4333		0.0895863			0.00885036			0.00303462			0.00158395			4.71405e-05
	y=0.0012x+0.0704
				NaCl (g/L)	Conc.	Relative collagen solubility (%)	SD
	Slope:	0.0012		0	1372.28	100	0
	Intercept:	0.0704		10	1201.33	87.543	6.0716
				20	967.25	70.485	4.17635
				30	377.361	27.4989	1.94167
				40	218.556	15.9265	1.01186
				50	130.472	9.50771	0.58463
				60	42.5556	3.10109	0.200788
								T1	T2	T3
		T	1	0	1417.5	100		100	100	100
				10	1183.75	83.5097		83.5097	96.4979	83.7292
				20	1068.58	75.3851		75.3851	71.046	65.1926
				30	385.917	27.2252		27.2252	30.1635	25.4555
				40	222	15.6614		15.6614	17.3578	14.9446										1.8048
				50	132.333	9.33568		9.33568	10.3402	8.95411
				60	42.5	2.99824		2.99824	3.3958	2.94626
		T	2	0	1254	100
				10	1210.08	96.4979
				20	890.917	71.046
				30	378.25	30.1635
				40	217.667	17.3578
				50	129.667	10.3402
				60	42.5833	3.3958
		T	3	0	1445.33	100
				10	1210.17	83.7292
				20	942.25	65.1926
				30	367.917	25.4555
				40	216	14.9446
				50	129.417	8.95411
				60	42.5833	2.94626

## Sheet: CaEC
			NaCl	0	Abs	Conc. (ug/mL)	10	Abs	Conc. (ug/mL)	20	Abs	Conc. (ug/mL)	30	Abs	Conc. (ug/mL)	40	Abs	Conc. (ug/mL)	50	Abs	Conc. (ug/mL)	60	Abs	Conc. (ug/mL)
			Treatment	1	1.0593	824.083	1	0.7873	597.417	1	0.7369	555.417	1	0.2685	165.083	1	0.1142	36.5	1	0.0923	18.25	1	0.1422	59.8333
				2	1.0125	785.083	2	0.7873	597.417	2	0.7369	555.417	2	0.2685	165.083	2	0.1142	36.5	2	0.0923	18.25	2	0.1349	53.75
				3	0.9604	741.667	3	0.7873	597.417	3	0.7369	555.417	3	0.2685	165.083	3	0.1142	36.5	3	0.0923	18.25	3	0.1239	44.5833
			Mean		1.01073	783.611		0.7873	597.417		0.7369	555.417		0.2685	165.083		0.1142	36.5		0.0923	18.25		0.133667	52.7222
			SD		0.0403951	33.6626		0	0		0			0			1.38778e-17			0			0.00752167
	y=0.0012x+0.0704
				NaCl (g/L)	Conc.	Relative collagen solubility (%)	SD
	Slope:	0.0012		0	783.611	100	0
	Intercept:	0.0704		10	597.417	76.2389	3.29494
				20	555.417	70.8791	3.0633
				30	165.083	21.067	0.910486
				40	36.5	4.65792	0.201309
				50	18.25	2.32896	0.100654
				60	52.7222	6.72811	0.51961
								T1	T2	T3
		T	1	0	824.083	100		100	100	100
				10	597.417	72.4947		72.4947	76.096	80.5506
				20	555.417	67.3981		67.3981	70.7462	74.8876
				30	165.083	20.0324		20.0324	21.0275	22.2584
				40	36.5	4.42916		4.42916	4.64919	4.92135
				50	18.25	2.21458		2.21458	2.32459	2.46067
				60	59.8333	7.26059		7.26059	6.84641	6.01124
		T	2	0	785.083	100
				10	597.417	76.096
				20	555.417	70.7462
				30	165.083	21.0275
				40	36.5	4.64919
				50	18.25	2.32459
				60	53.75	6.84641
		T	3	0	741.667	100
				10	597.417	80.5506
				20	555.417	74.8876
				30	165.083	22.2584
				40	36.5	4.92135
				50	18.25	2.46067
				60	44.5833	6.01124

## Sheet: CoFC
			NaCl	0	Abs	Conc. (ug/mL)	10	Abs	Conc. (ug/mL)	20	Abs	Conc. (ug/mL)	30	Abs	Conc. (ug/mL)	40	Abs	Conc. (ug/mL)	50	Abs	Conc. (ug/mL)	60	Abs	Conc. (ug/mL)
			Treatment	1	1.2355	970.917	1	1.2121	951.417	1	1.2202	958.167	1	1.1931	935.583	1	1.1616	909.333	1	1.1719	917.917	1	1.1603	908.25
				2	1.2488	982	2	1.2359	971.25	2	1.2061	946.417	2	1.1993	940.75	2	1.1981	939.75	2	1.1847	928.583	2	1.1573	905.75
				3	1.2253	962.417	3	1.2463	979.917	3	1.2221	959.75	3	1.2017	942.75	3	1.2167	955.25	3	1.1922	934.833	3	1.1594	907.5
			Mean		1.23653	971.778		1.23143	967.528		1.21613	954.778		1.19803	939.694		1.19213	934.778		1.18293	927.111		1.159	907.167
			SD		0.00962162	8.01802		0.0143149	11.9291		0.00713691			0.00362338			0.0228867			0.00838106			0.00125698
	y=0.0012x+0.0704
				NaCl (g/L)	Conc.	Relative collagen solubility (%)	SD
	Slope:	0.0012		0	971.778	100	0
	Intercept:	0.0704		10	967.528	99.5627	1.63179
				20	954.778	98.2506	1.39882
				30	939.694	96.6985	0.913769
				40	934.778	96.1925	2.31325
				50	927.111	95.4036	1.21772
				60	907.167	93.3512	0.850818
								T1	T2	T3
		T	1	0	970.917	100		100	100	100
				10	951.417	97.9916		97.9916	98.9053	101.818
				20	958.167	98.6868		98.6868	96.3764	99.7229
				30	935.583	96.3608		96.3608	95.7994	97.9565
				40	909.333	93.6572		93.6572	95.6976	99.2553
				50	917.917	94.5412		94.5412	94.5604	97.134
				60	908.25	93.5456		93.5456	92.2352	94.2939
		T	2	0	982	100
				10	971.25	98.9053
				20	946.417	96.3764
				30	940.75	95.7994
				40	939.75	95.6976
				50	928.583	94.5604
				60	905.75	92.2352
		T	3	0	962.417	100
				10	979.917	101.818
				20	959.75	99.7229
				30	942.75	97.9565
				40	955.25	99.2553
				50	934.833	97.134
				60	907.5	94.2939

## Sheet: Mix graph (NaCl Conc.)
NaCl (g/L)	AaEC	SD	LaEC	SD	CaEC	SD	CoFC	SD
0	100	2.06372	100	0	100	0	100	0
10	93.3092	1.53195	87.543	6.0716	76.2389	3.29494	99.5627	1.63179
20	91.3418	8.92295	70.485	4.17635	70.8791	3.0633	98.2506	1.39882
30	44.3545	2.57	27.4989	1.94167	21.067	0.910486	96.6985	0.913769
40	16.0862	1.15835	15.9265	1.01186	4.65792	0.201309	96.1925	2.31325
50	17.6761	1.06405	9.50771	0.58463	2.32896	0.100654	95.4036	1.21772
60	11.5015	0.847389	3.10109	0.200788	6.72811	0.51961	93.3512	0.850818

## Sheet: pH_Dilute
				Acetic acid-extracted collagen (AaEC)
			pH	1	Abs	Conc. (ug/mL)	3	Abs	Conc. (ug/mL)	5	Abs	Conc. (ug/mL)	7	Abs	Conc. (ug/mL)	9	Abs	Conc. (ug/mL)	11	Abs	Conc. (ug/mL)
			Treatment	1	0.8463	646.583	1	0.7211	542.25	1	0.6857	512.75	1	0.3891	265.583	1	0.448	314.667	1	0.3887	265.25
				2	0.7827	593.583	2	0.7211	542.25	2	0.6946	520.167	2	0.3458	229.5	2	0.4564	321.667	2	0.3964	271.667
				3	0.8145	620.083	3	0.7211	542.25	3	0.6983	523.25	3	0.3353	220.75	3	0.4334	302.5	3	0.3627	243.583
			Mean		0.8145	620.083		0.7211	542.25		0.692867	518.722		0.356733	238.611		0.445933	312.944		0.3826	260.167
			SD		0.0259646	21.6372		0	0		0.00528793			0.0232847			0.00950275			0.0144183
	y=0.0012x+0.0704
				pH	Conc.	Relative solubility (%)	SD
	Slope:	0.0012		1	620.083	100	0
	Intercept:	0.0704		3	542.25	87.4479	3.05792
				5	518.722	83.6536	3.42815
				7	238.611	38.4805	2.24037
				9	312.944	50.4681	2.57702
				11	260.167	41.9567	2.74042
								T1	T2	T3
		T	1	1	646.583	100		100	100	100
				3	542.25	83.8639		83.8639	91.352	87.4479
				5	512.75	79.3015		79.3015	87.6316	84.3838
				7	265.583	41.0749		41.0749	38.6635	35.6001
				9	314.667	48.6661		48.6661	54.1907	48.7838
				11	265.25	41.0233		41.0233	45.7672	39.2824
		T	2	1	593.583	100
				3	542.25	91.352
				5	520.167	87.6316
				7	229.5	38.6635
				9	321.667	54.1907
				11	271.667	45.7672
		T	3	1	620.083	100
				3	542.25	87.4479
				5	523.25	84.3838
				7	220.75	35.6001
				9	302.5	48.7838
				11	243.583	39.2824
				Lactic acid-extracted collagen (LaEC)
			pH	1	Abs	Conc. (ug/mL)	3	Abs	Conc. (ug/mL)	5	Abs	Conc. (ug/mL)	7	Abs	Conc. (ug/mL)	9	Abs	Conc. (ug/mL)	11	Abs	Conc. (ug/mL)
			Treatment	1	0.5832	427.333	1	0.532	384.667	1	0.4552	320.667	1	0.295	187.167	1	0.3799	257.917	1	0.3131	202.25
				2	0.5616	409.333	2	0.5239	377.917	2	0.4351	303.917	2	0.3007	191.917	2	0.3759	254.583	2	0.3079	197.917
				3	0.5656	412.667	3	0.5307	383.583	3	0.4252	295.667	3	0.271	167.167	3	0.3585	240.083	3	0.3093	199.083
			Mean		0.570133	416.444		0.528867	382.056		0.4385	306.75		0.2889	182.083		0.371433	250.861		0.3101	199.75
			SD		0.00938273	7.81894		0.00355184	2.95987		0.0124812			0.0128693			0.0092899			0.00219697
	y=0.0012x+0.0704
				pH	Conc.	Relative collagen solubility (%)
	Slope:	0.0012		1	416.444	100
	Intercept:	0.0704		3	382.056	91.7423
				5	306.75	73.6593
				7	120.222	28.8687
				9	250.861	60.2388
				11	199.75	47.9656
				pH	Conc.	Relative solubility (%)	SD
				1	416.444	100	0
				3	382.056	91.7423	1.26276
				5	306.75	73.6593	1.44845
				7	182.083	43.7233	2.60355
				9	250.861	60.2388	1.64149
				11	199.75	47.9656	0.458749
								T1	T2	T3
		T	1	1	427.333	100		100	100	100
				3	384.667	90.0156		90.0156	92.3249	92.9523
				5	320.667	75.039		75.039	74.2467	71.6478
				7	187.167	43.7988		43.7988	46.8852	40.5089
				9	257.917	60.3549		60.3549	62.1946	58.1785
				11	202.25	47.3284		47.3284	48.351	48.2431
		T	2	1	409.333	100
				3	377.917	92.3249
				5	303.917	74.2467
				7	191.917	46.8852
				9	254.583	62.1946
				11	197.917	48.351
		T	3	1	412.667	100
				3	383.583	92.9523
				5	295.667	71.6478
				7	167.167	40.5089
				9	240.083	58.1785
				11	199.083	48.2431
				Citric acid-extracted collagen (LaEC)
			pH	1	Abs	Conc. (ug/mL)	3	Abs	Conc. (ug/mL)	5	Abs	Conc. (ug/mL)	7	Abs	Conc. (ug/mL)	9	Abs	Conc. (ug/mL)	11	Abs	Conc. (ug/mL)
			Treatment	1	0.6459	479.583	1	0.5363	388.25	1	0.4839	344.583	1	0.3176	206	1	0.2823	176.583	1	0.3181	206.417
				2	0.6537	486.083	2	0.5102	366.5	2	0.4894	349.167	2	0.3251	212.25	2	0.2611	158.917	2	0.3079	197.917
				3	0.6381	473.083	3	0.5062	363.167	3	0.4898	349.5	3	0.2939	186.25	3	0.2349	137.083	3	0.2854	179.167
			Mean		0.6459	479.583		0.517567	372.639		0.4877	347.75		0.3122	201.5		0.259433	157.528		0.3038	194.5
			SD		0.00636867	5.30723		0.0133467	11.1223		0.00269196			0.0132974			0.0193868			0.0136609
	y=0.0012x+0.0704												0.2259	0.295
				pH	Conc.	Relative collagen solubility (%)	SD						0.2182	0.3007
	Slope:	0.0012		1	479.583	100	0						0.1999	0.271
	Intercept:	0.0704		3	372.639	77.7006	2.36421
				5	347.75	72.5109	0.959537
				7	201.5	42.0156	1.88003
				9	157.528	32.8468	3.20359
				11	194.5	40.556	2.11368
								T1	T2	T3
		T	1	1	479.583	100		100	100	100
				3	388.25	80.9557		80.9557	75.3986	76.7659
				5	344.583	71.8506		71.8506	71.8327	73.877
				7	206	42.954		42.954	43.6654	39.3694
				9	176.583	36.8202		36.8202	32.6933	28.9766
				11	206.417	43.0408		43.0408	40.7166	37.8721
		T	2	1	486.083	100
				3	366.5	75.3986
				5	349.167	71.8327
				7	212.25	43.6654
				9	158.917	32.6933
				11	197.917	40.7166
		T	3	1	473.083	100
				3	363.167	76.7659
				5	349.5	73.877
				7	186.25	39.3694
				9	137.083	28.9766
				11	179.167	37.8721
				Commercial Fish Collagen (CoFC)
			pH	1	Abs	Conc. (ug/mL)	3	Abs	Conc. (ug/mL)	5	Abs	Conc. (ug/mL)	7	Abs	Conc. (ug/mL)	9	Abs	Conc. (ug/mL)	11	Abs	Conc. (ug/mL)
			Treatment	1	0.8246	628.5	1	0.7843	594.917	1	0.6975	522.583	1	0.6752	504	1	0.6401	474.75	1	0.6723	501.583
				2	0.8229	627.083	2	0.7869	597.083	2	0.6951	520.583	2	0.673	502.167	2	0.6391	473.917	2	0.6718	501.167
				3	0.8221	626.417	3	0.7862	596.5	3	0.6933	519.083	3	0.6726	501.833	3	0.6379	472.917	3	0.6713	500.75
			Mean		0.8232	627.333		0.7858	596.167		0.6953	520.75		0.6736	502.667		0.639033	473.861		0.6718	501.167
			SD		0.00104243	0.868694		0.00109848	0.915403		0.00172047			0.0011431			0.000899383			0.000408248
	y=0.0012x+0.0704
				pH	Conc.	Relative collagen solubility (%)	SD
	Slope:	0.0012		1	627.333	100	0
	Intercept:	0.0704		3	596.167	95.0319	0.26564
				5	520.75	83.0101	0.115305
				7	502.667	80.1275	0.0467376
				9	473.861	75.5358	0.032348
				11	501.167	79.8884	0.0585299
								T1	T2	T3
		T	1	1	628.5	100		100	100	100
				3	594.917	94.6566		94.6566	95.2159	95.2242
				5	522.583	83.1477		83.1477	83.0166	82.8655
				7	504	80.1909		80.1909	80.0797	80.1117
				9	474.75	75.537		75.537	75.5748	75.4955
				11	501.583	79.8064		79.8064	79.9203	79.9388
		T	2	1	627.083	100
				3	597.083	95.2159
				5	520.583	83.0166
				7	502.167	80.0797
				9	473.917	75.5748
				11	501.167	79.9203
		T	3	1	626.417	100
				3	596.5	95.2242
				5	519.083	82.8655
				7	501.833	80.1117
				9	472.917	75.4955
				11	500.75	79.9388
				pH	AaEC	SD	LaEC	SD	CaEC	SD	CoFC	SD
				1	100	0	100	0	100	0	100	0
				3	87.4479	3.05792	91.7423	1.26276	77.7006	2.36421	95.0319	0.26564
				5	83.6536	3.42815	73.6593	1.44845	72.5109	0.959537	83.0101	0.115305
				7	38.4805	2.24037	43.7233	2.60355	42.0156	1.88003	80.1275	0.0467376
				9	50.4681	2.57702	60.2388	1.64149	32.8468	3.20359	75.5358	0.032348
				11	41.9567	2.74042	47.9656	0.458749	40.556	2.11368	79.8884	0.0585299

## Sheet: Sheet1
	BSA stock solution in 3 mg/mL			: 30 mg/10 mL
	No	Protein std. (mL)	dH2O (mL)	Lowry sol.	Folin sol.	Protein conc. (ug/mL)	Abs 750			Mean	SD
				(mL)	(mL)		R1	R2	R3				concentration	Absorbance
	1	0	1	1	0.5	0	0.0375	0.0315	0.0368	0.0352667	0.00267872		0	0.0352667
	2	0.1	0.9	1	0.5	300	0.4373	0.4544	0.45	0.447233	0.00724998		50	0.1179
	3	0.2	0.8	1	0.5	600	0.6354	0.6353	0.6337	0.6348	0.000778888		100	0.1959
	4	0.3	0.7	1	0.5	900	0.7777	0.7798	0.7884	0.781967	0.00462913		200	0.3105
	5	0.4	0.6	1	0.5	1200	0.8814	0.8882	0.8746	0.8814	0.00555218		300	0.4201
	6	0.5	0.5	1	0.5	1500	1.0236	1.0192	1.0266	1.02313	0.00303901		400	0.5343
	7	0.6	0.4	1	0.5	1800	1.1062	1.0918	1.0911	1.09637	0.00695909		500	0.6348
	8	0.7	0.3	1	0.5	2100	1.1845	1.1815	1.1729	1.17963	0.00491619
	9	0.8	0.2	1	0.5	2400	1.3195	1.309	1.3067	1.31173	0.00557155
	10	0.9	0.1	1	0.5	2700	1.3406	1.3362	1.3359	1.33757	0.00214838
	Solubility on NaCl concentration (6 mg/mL)
	All acids-soluble collagen
	No	NaCl Conc. (%)	Collagen prepared in 10 mL		NaCl added (gram)	Abs 750			Mean	SD
			Collagen sol.	AcOH sol.		R1	R2	R3
	1	0	5	5	0
	2	1	5	5	0.1
	3	2	5	5	0.2
	4	3	5	5	0.3
	5	4	5	5	0.4
	6	5	5	5	0.5
	7	6	5	5	0.6
	Solubility on pH concentration (3 mg/mL)				90 mg/30 mL
	All acids-soluble collagen
	No	pH value	Collagen prepared in 10 mL		Abs 550			Mean	SD
			Collagen sol.	top up to 10 mL	R1	R2	R3
	1	1	8	2
	2	3	8	2
	3	5	8	2
	4	7	8	2
	5	9	8	2
	6	11	8	2
