# Supplementary material for: Biochemical analysis of collagens from the bone of lizardfish (Saurida tumbil Bloch, 1795) extracted with different acids
Source: PeerJ. 2022 Mar 15;10:e13103. doi: 10.7717/peerj.13103 (PMC8932308; doi:10.7717/peerj.13103)
Supplement: Table S1 [file peerj-10-13103-s001.xlsx]

## Sheet: Yield
Table 1. Yield (%) of lizardfish bone collagen
Acid extraction	Treatmen			Total	Mean	SD
	1	2	3
AaEC	1.631	1.7268	1.8225	1.72677	0.575589	0.0781796
LaEC	1.8399	1.877	1.914	1.87697	0.625656	0.0302512
CaEC	2.5921	3.1079	2.0762	2.59207	0.864022	0.51585

## Sheet: Colour test
Table 1 Color attributes (L*, a*, b* and whiteness index) of collagens from lizardfish bones extracted with different acids.
Samples	L*			a*			b*			Mean						WI	SD
	T1	T2	T3	T1	T2	T3	T1	T2	T3	L*	SD	a*	SD	b*	SD
AaEC	87.96	88.9	88.77	0.07	0.23	0.29	8.52	9.47	9.69	88.5433	0.415879	0.196667	0.0928559	9.22667	0.507696	85.2886	0.100602
LaEC	88.32	88.33	87.36	0.56	0.55	0.52	10.14	10.38	10.26	88.0033	0.454924	0.543333	0.0169967	10.26	0.0979796	84.205	0.352095
CaEC	89.76	87.7	87.83	0.65	0.85	0.63	11.52	12.38	12	88.43	0.941948	0.71	0.0993311	11.9667	0.351884	83.3396	0.889939
CoFC	84.43	85.43	84.1	0.58	0.59	0.53	16.94	17.94	17.31	84.6533	0.565469	0.566667	0.0262467	17.3967	0.412822	76.7947	0.212975
Samples	L*	SD	a*	SD	b*	SD	WI	SD
AaEC	88.5433	0.415879	0.196667	0.0928559	9.22667	0.507696	85.2886	0.100602
LaEC	88.0033	0.454924	0.543333	0.0169967	10.26	0.0979796	84.205	0.352095
CaEC	88.43	0.941948	0.71	0.0993311	11.9667	0.351884	83.3396	0.889939
CoFC	84.65	0.57	0.57	0.03	17.4	0.41	76.7947	0.212975
